# Supplementary material for: Effects of haloniums on gold-catalyzed ring expansion of 1-oxiranyl-1-alkynylcyclopropanes
Source: Royal Society of Chemistry journal article supplement (doi:10.1039/c0cc03309j), 2010-11-26

## *Supporting Information*

### **Effects of Haloniums on Gold-catalyzed Ring Expansion of 1-Epoxy-1-alkynylcyclopropanes**

Hsuan-Hung Liao and Rai-Shung Liu\*

#### **Contents:**

|                                                                                   |                 |
|-----------------------------------------------------------------------------------|-----------------|
| (1) <sup>1</sup> H and <sup>13</sup> C NMR Spectra of Compounds <b>1a-7</b> ..... | <b>S 2-S 81</b> |
|-----------------------------------------------------------------------------------|-----------------|

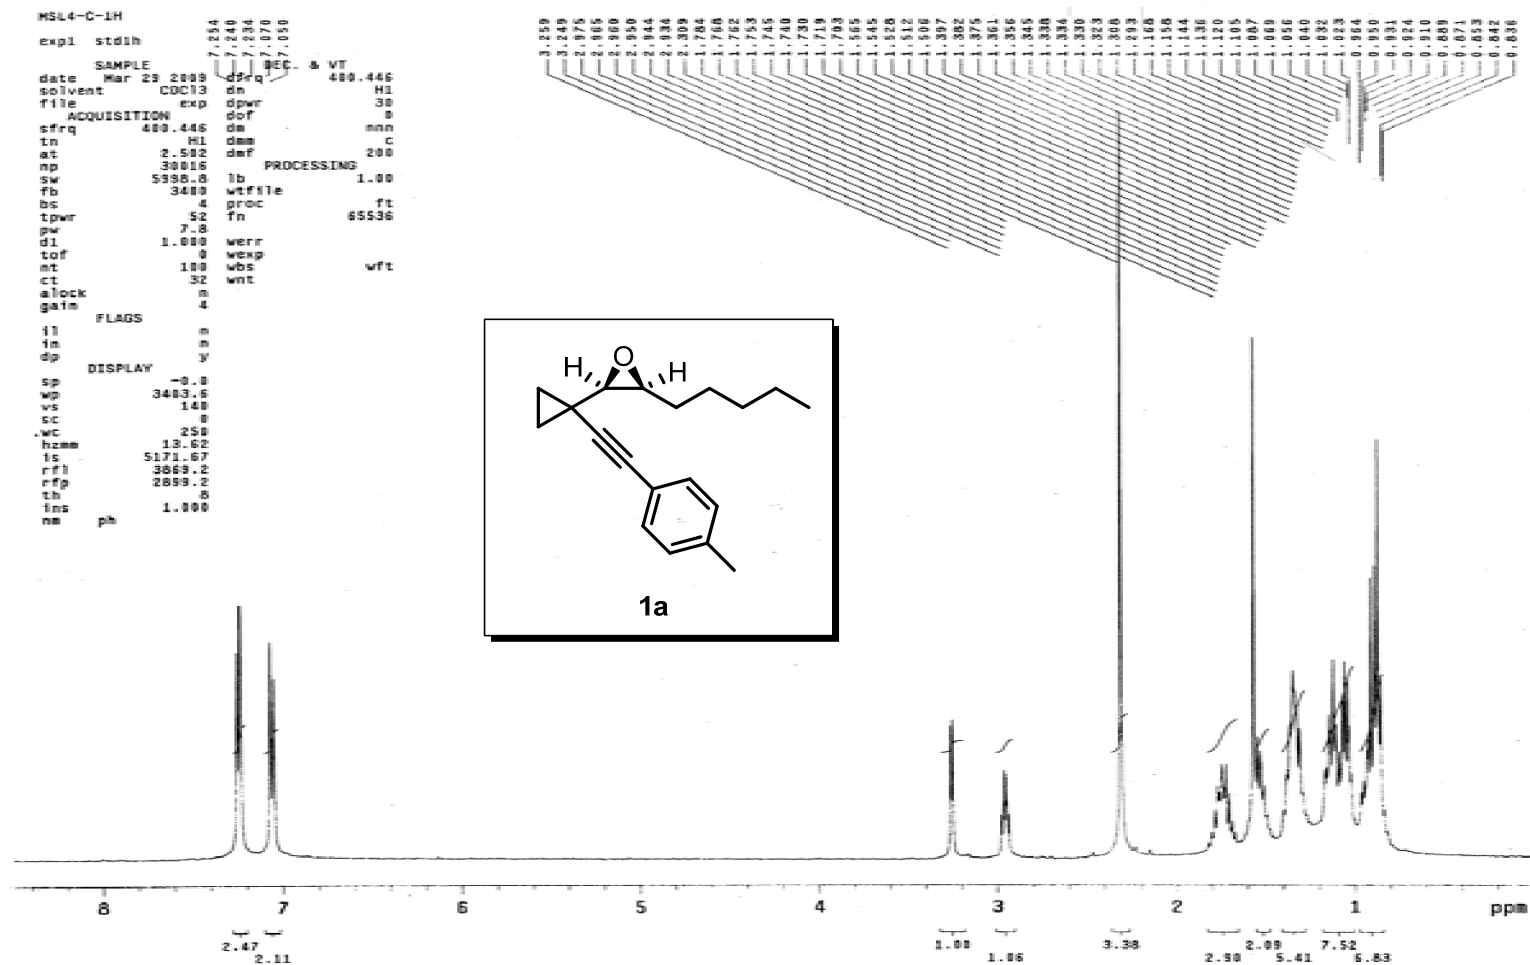

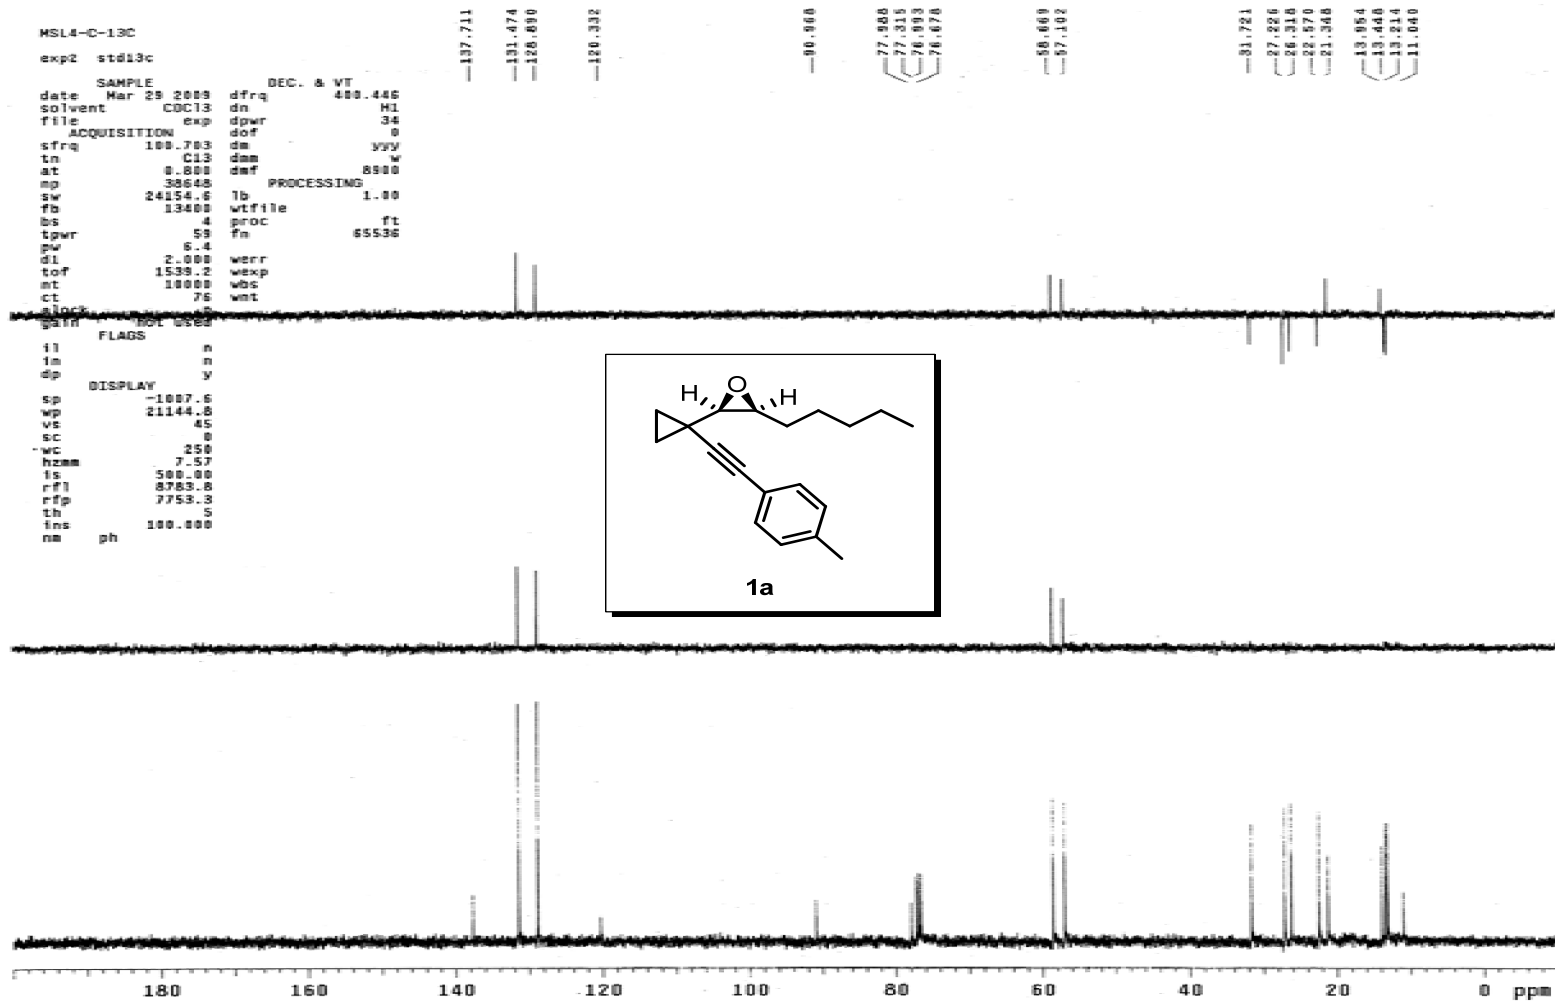

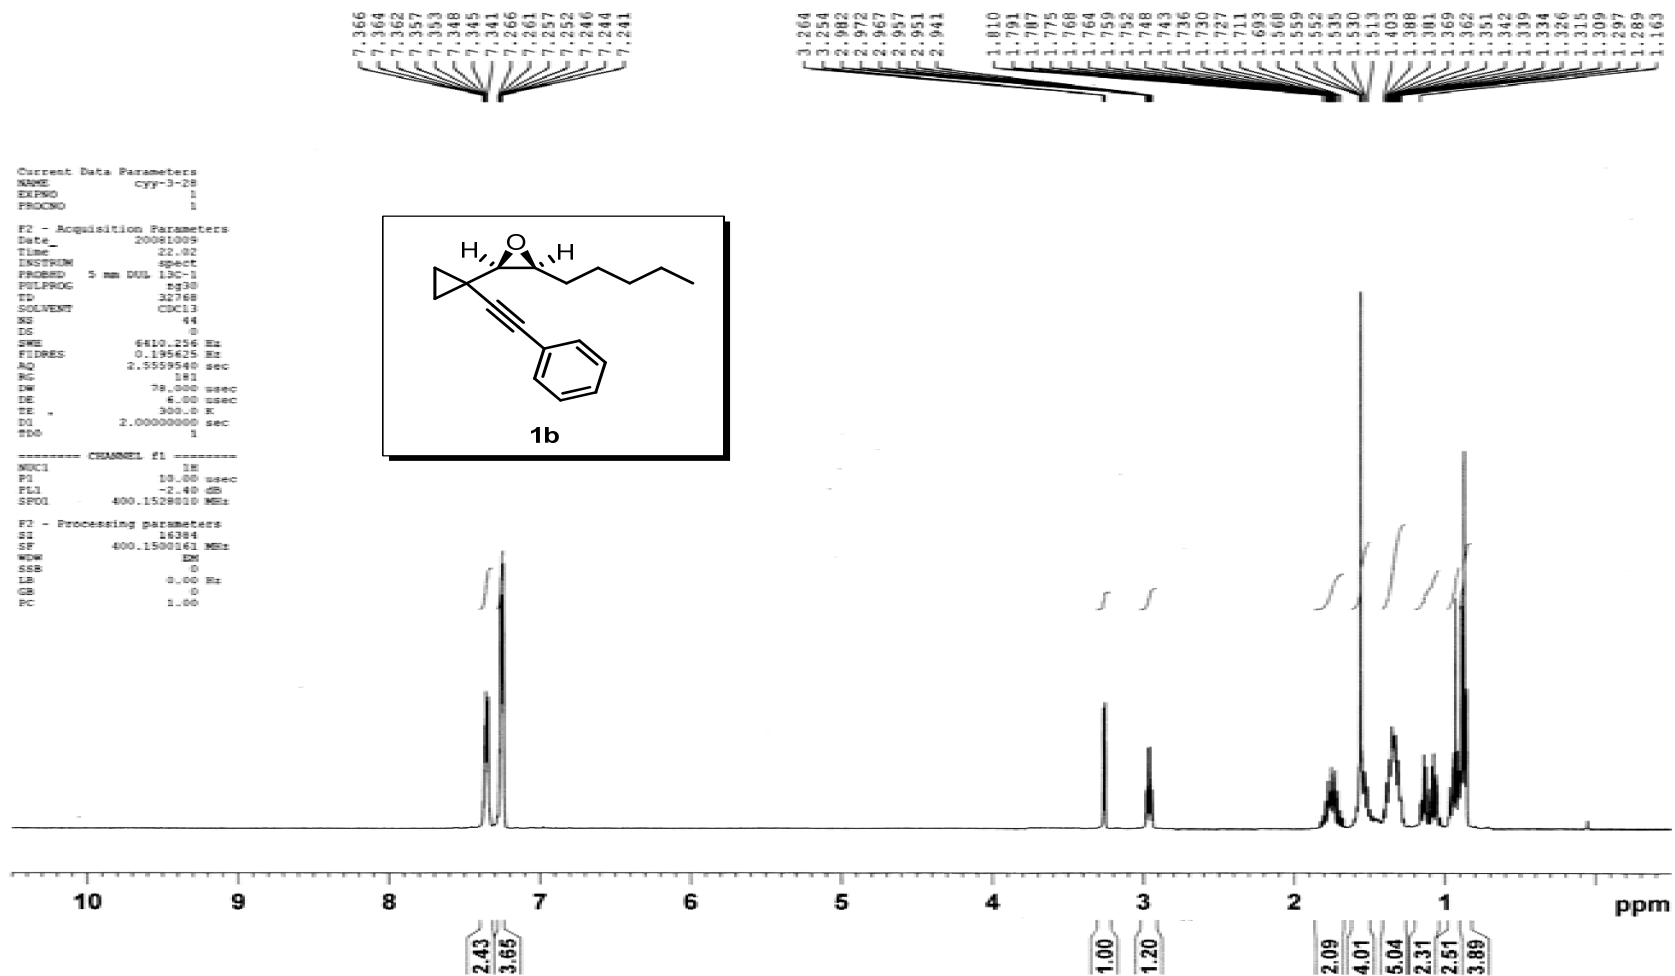

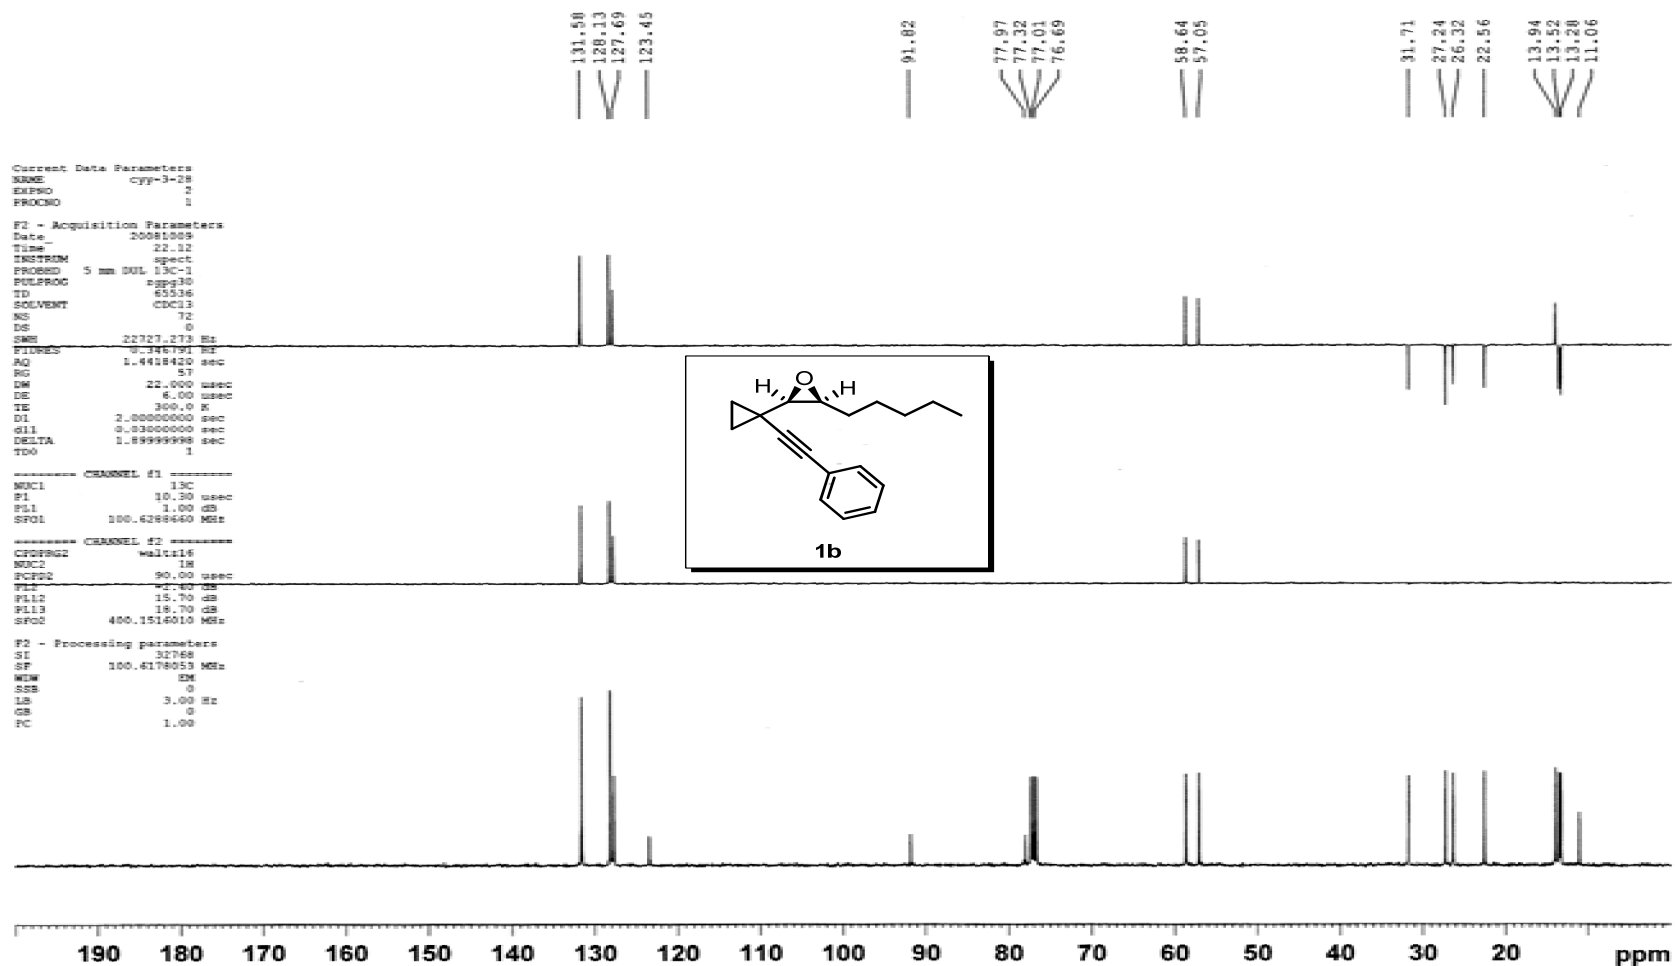

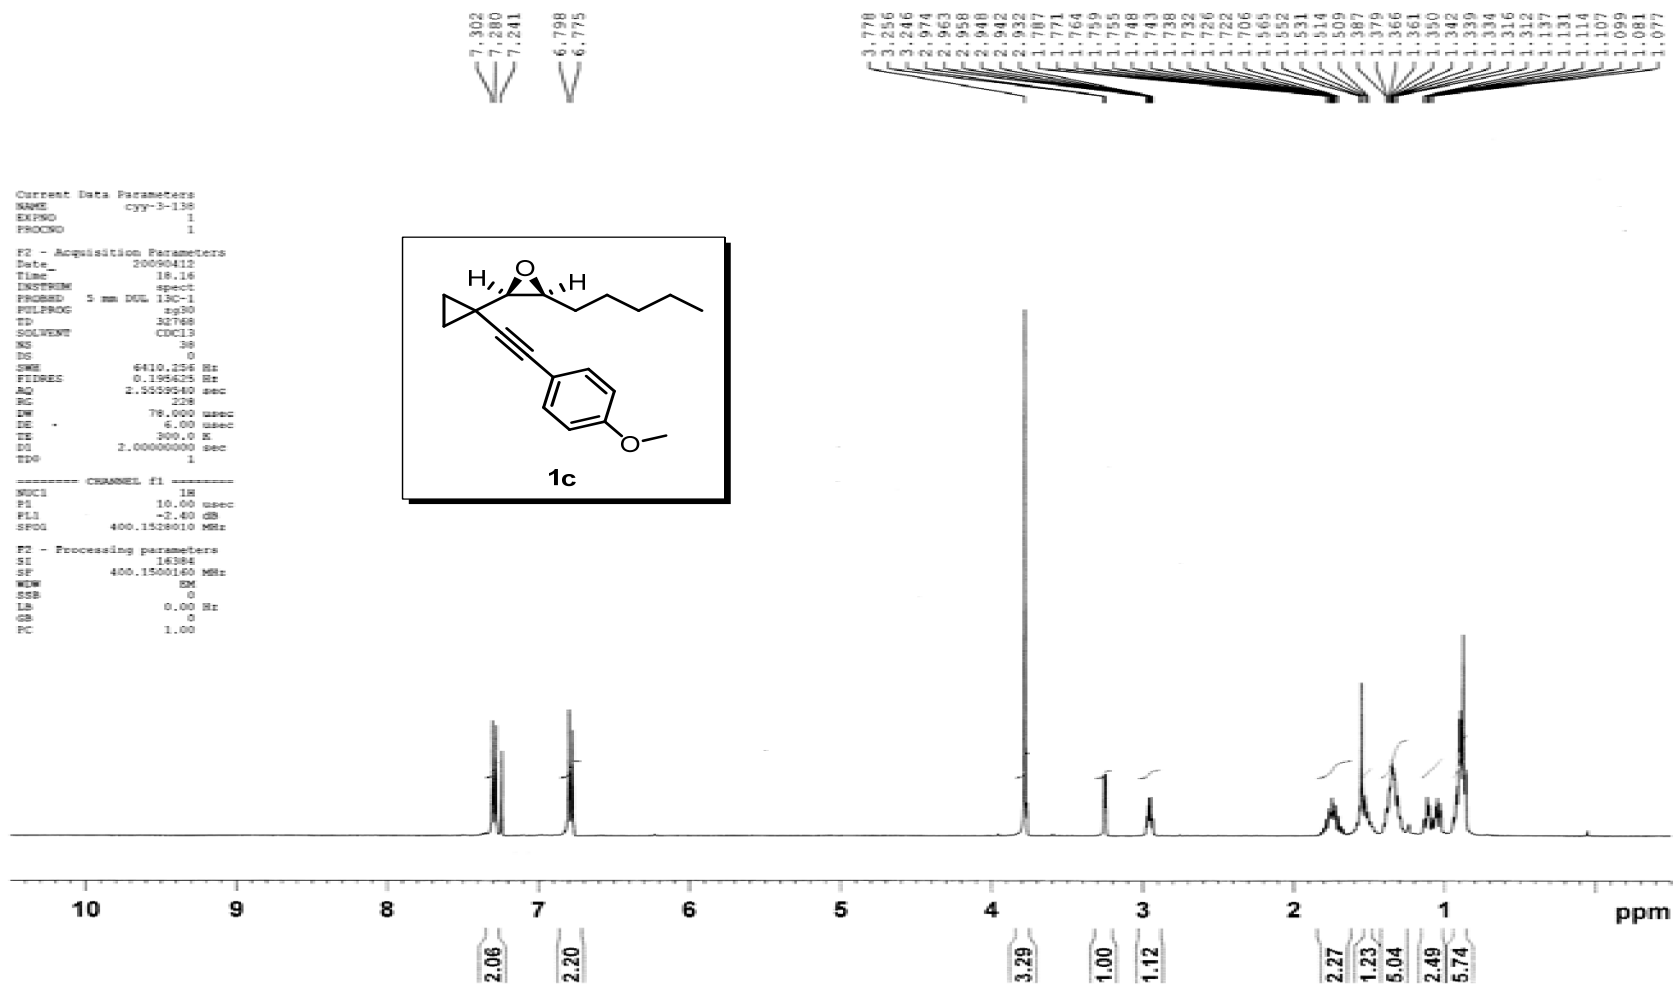

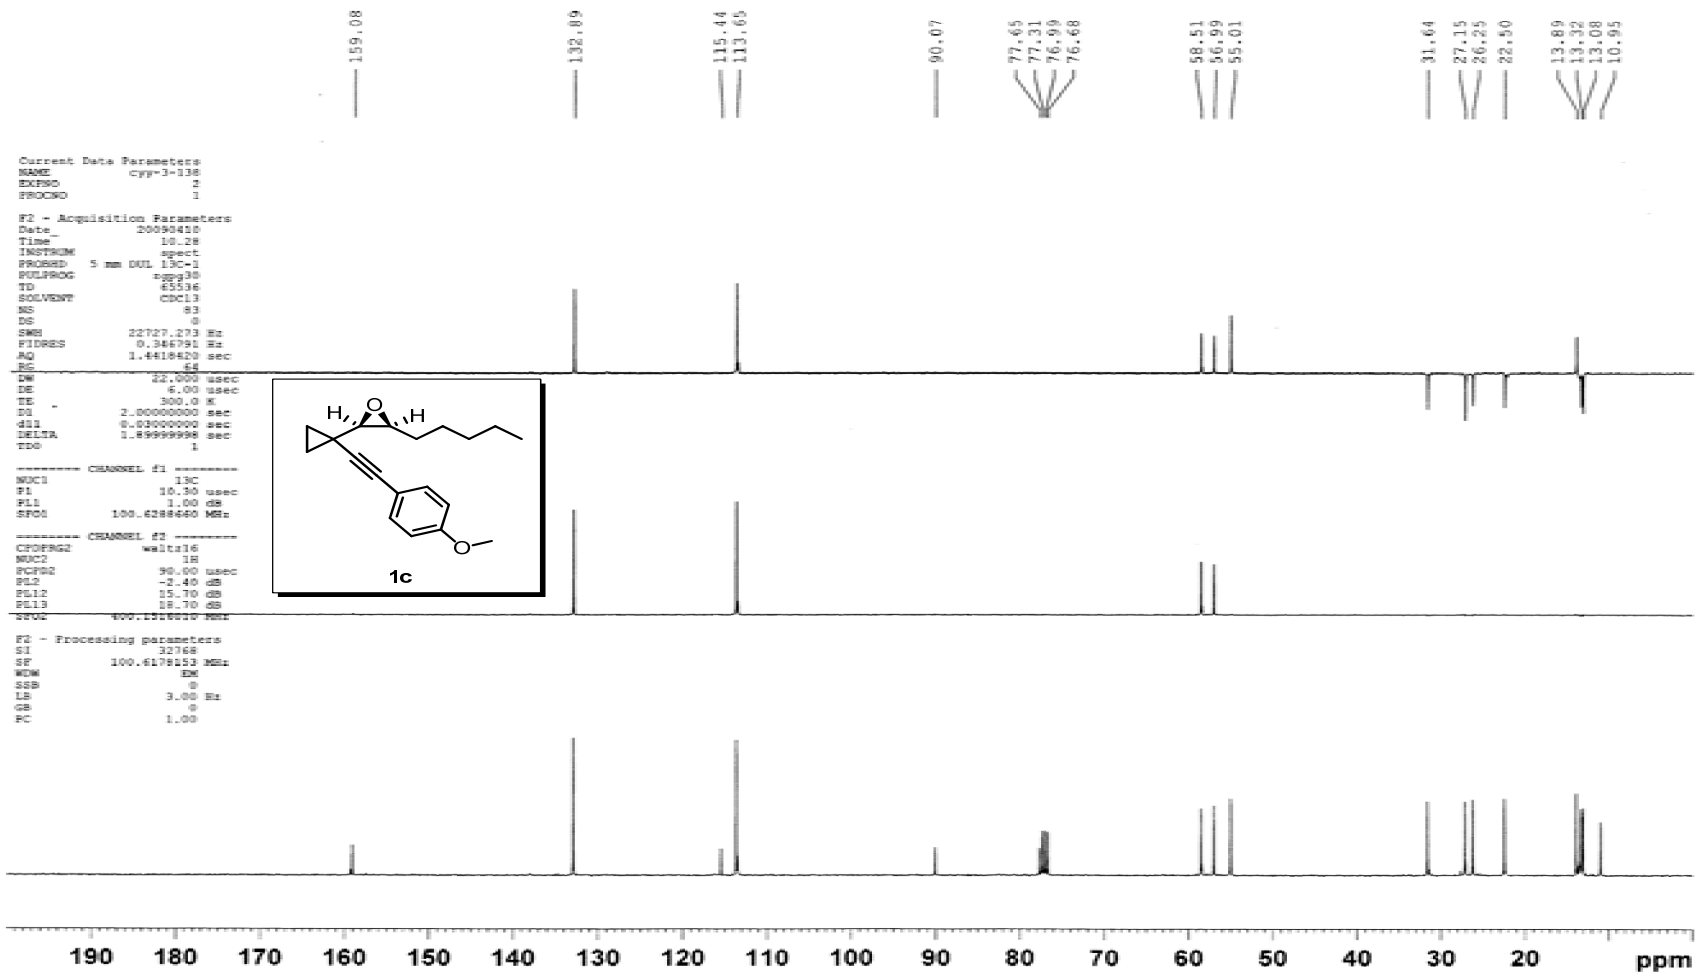

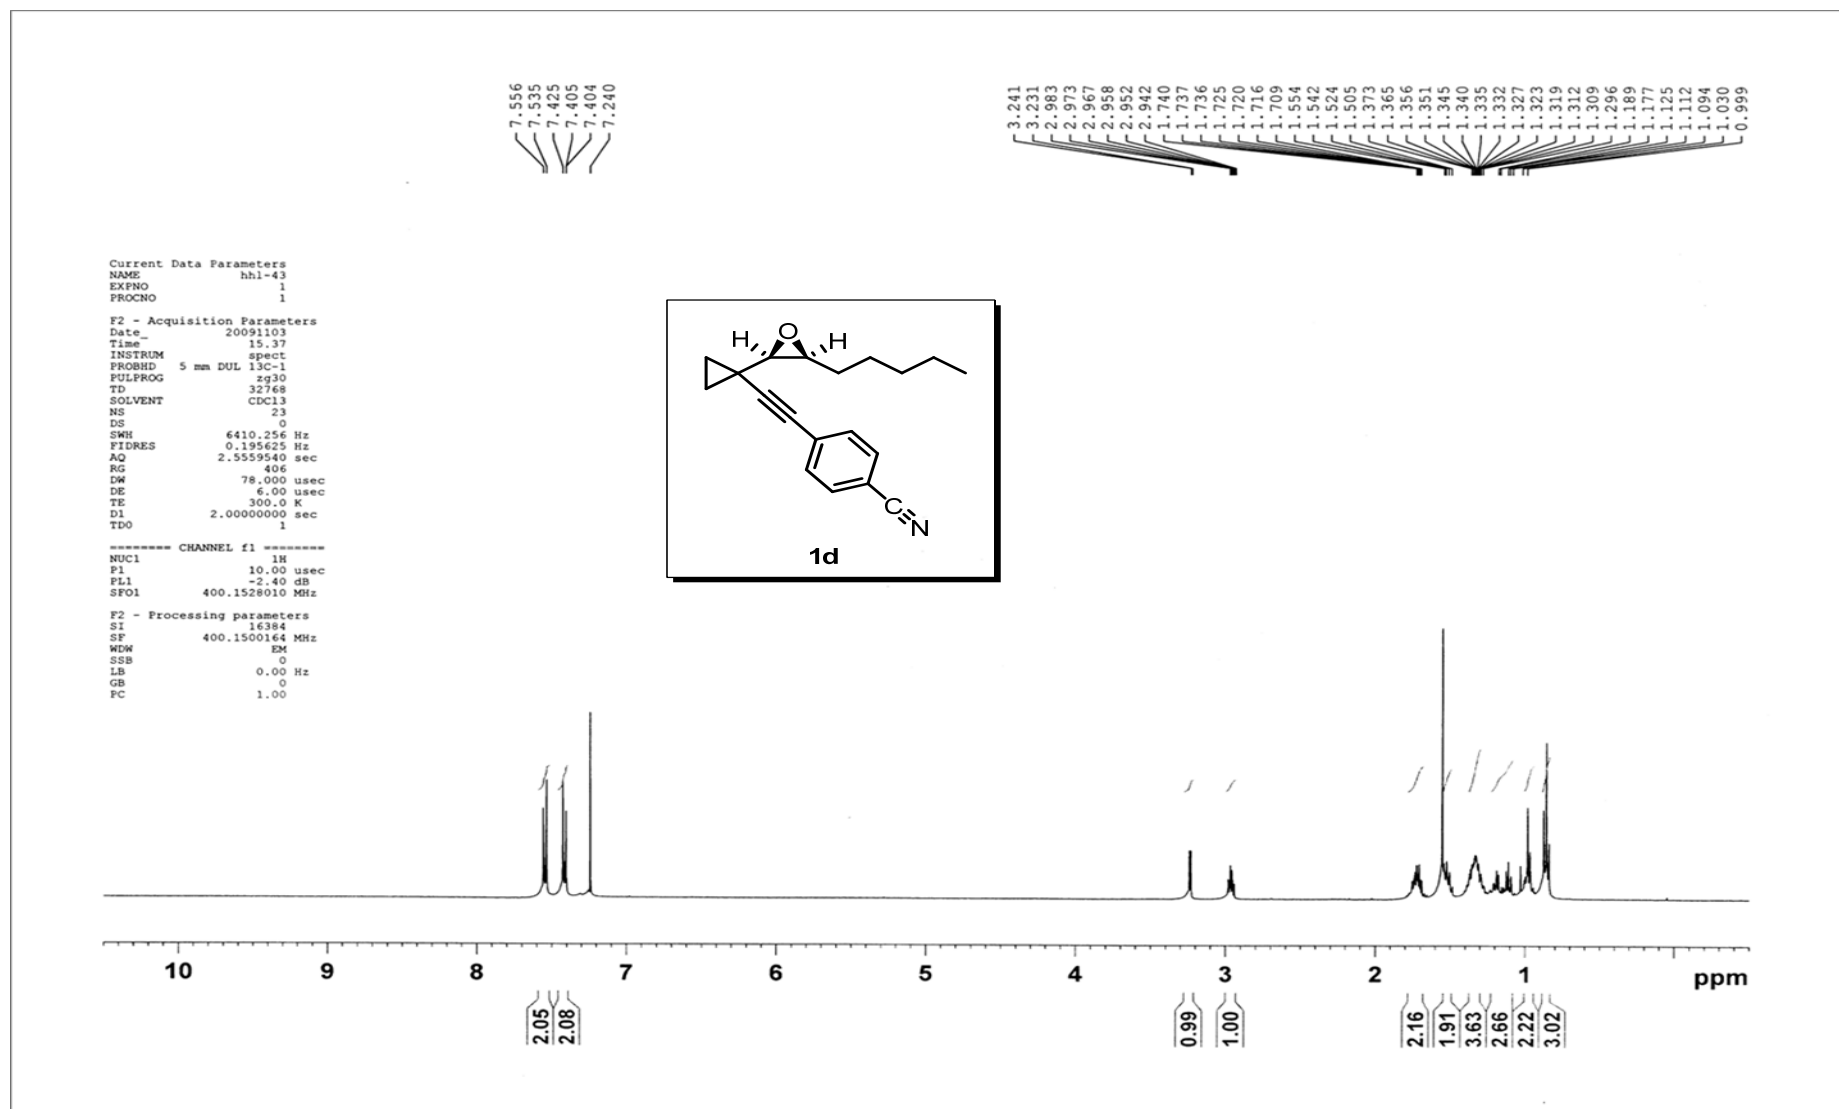



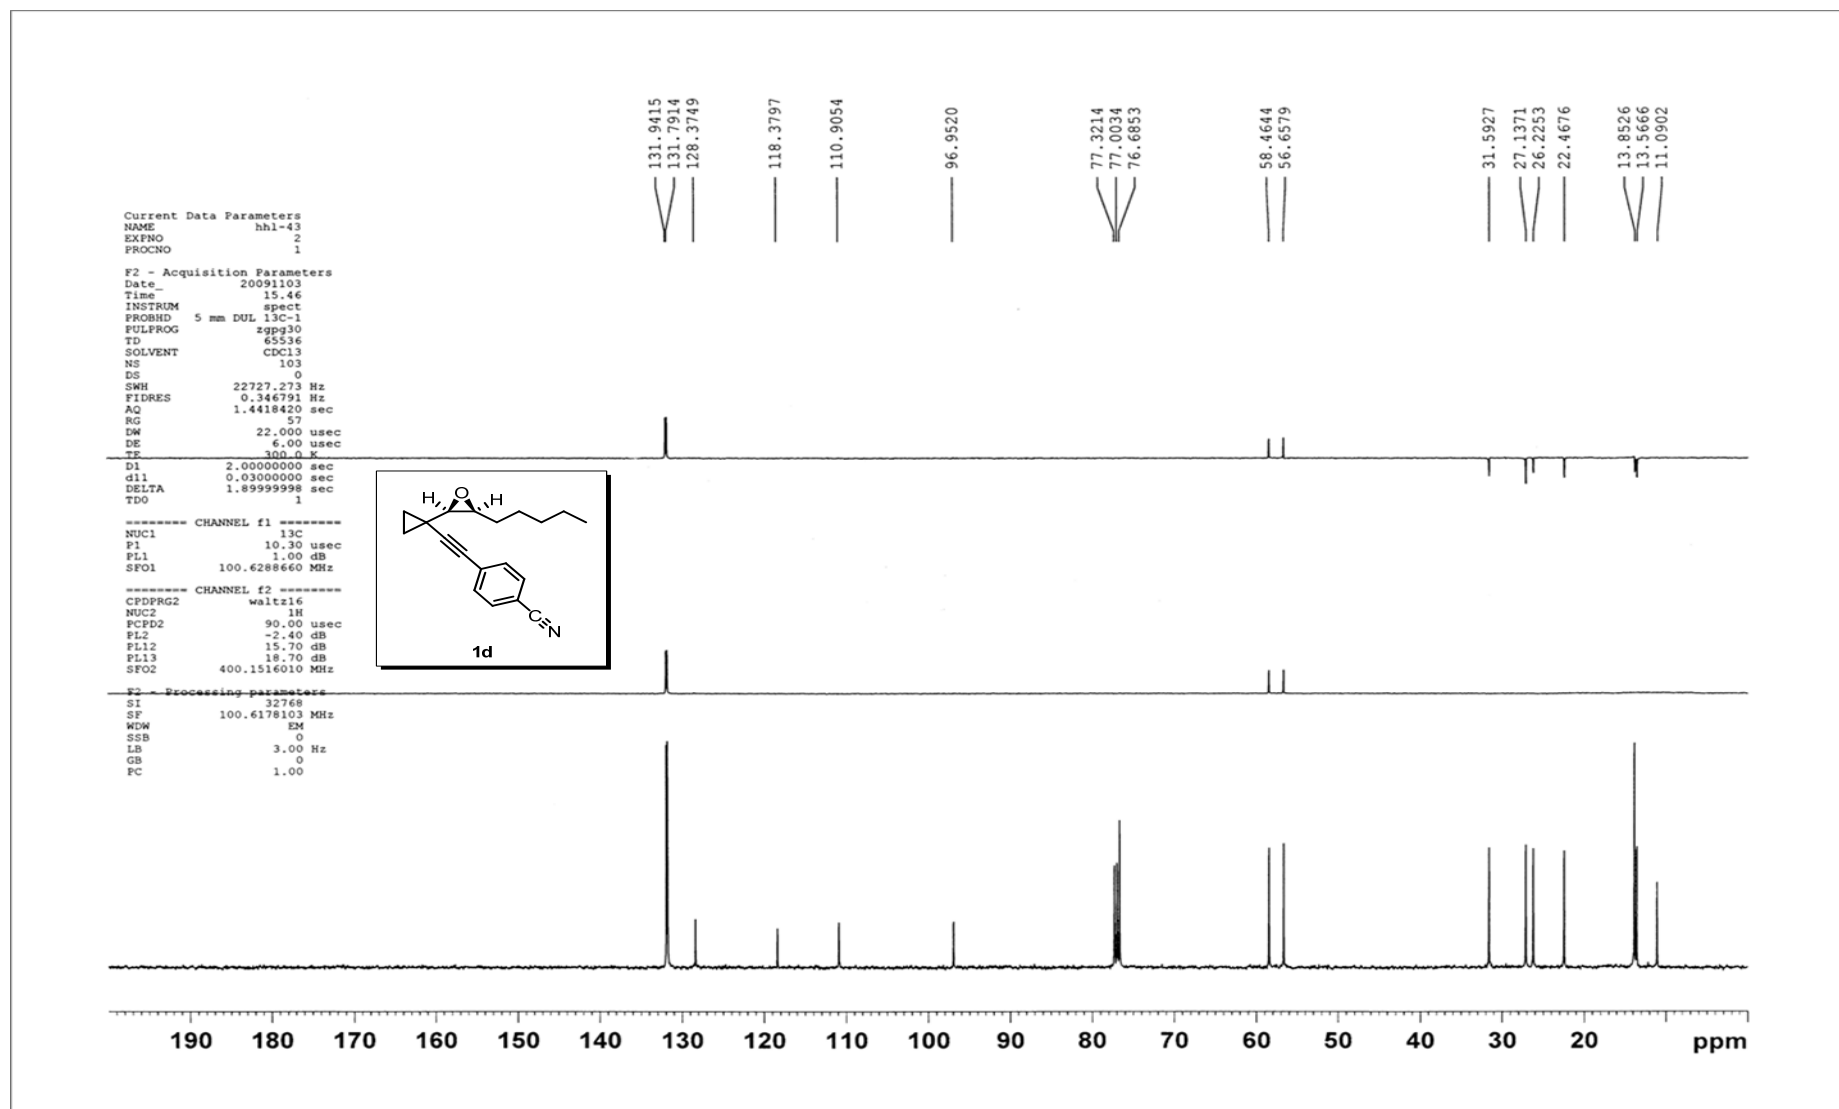

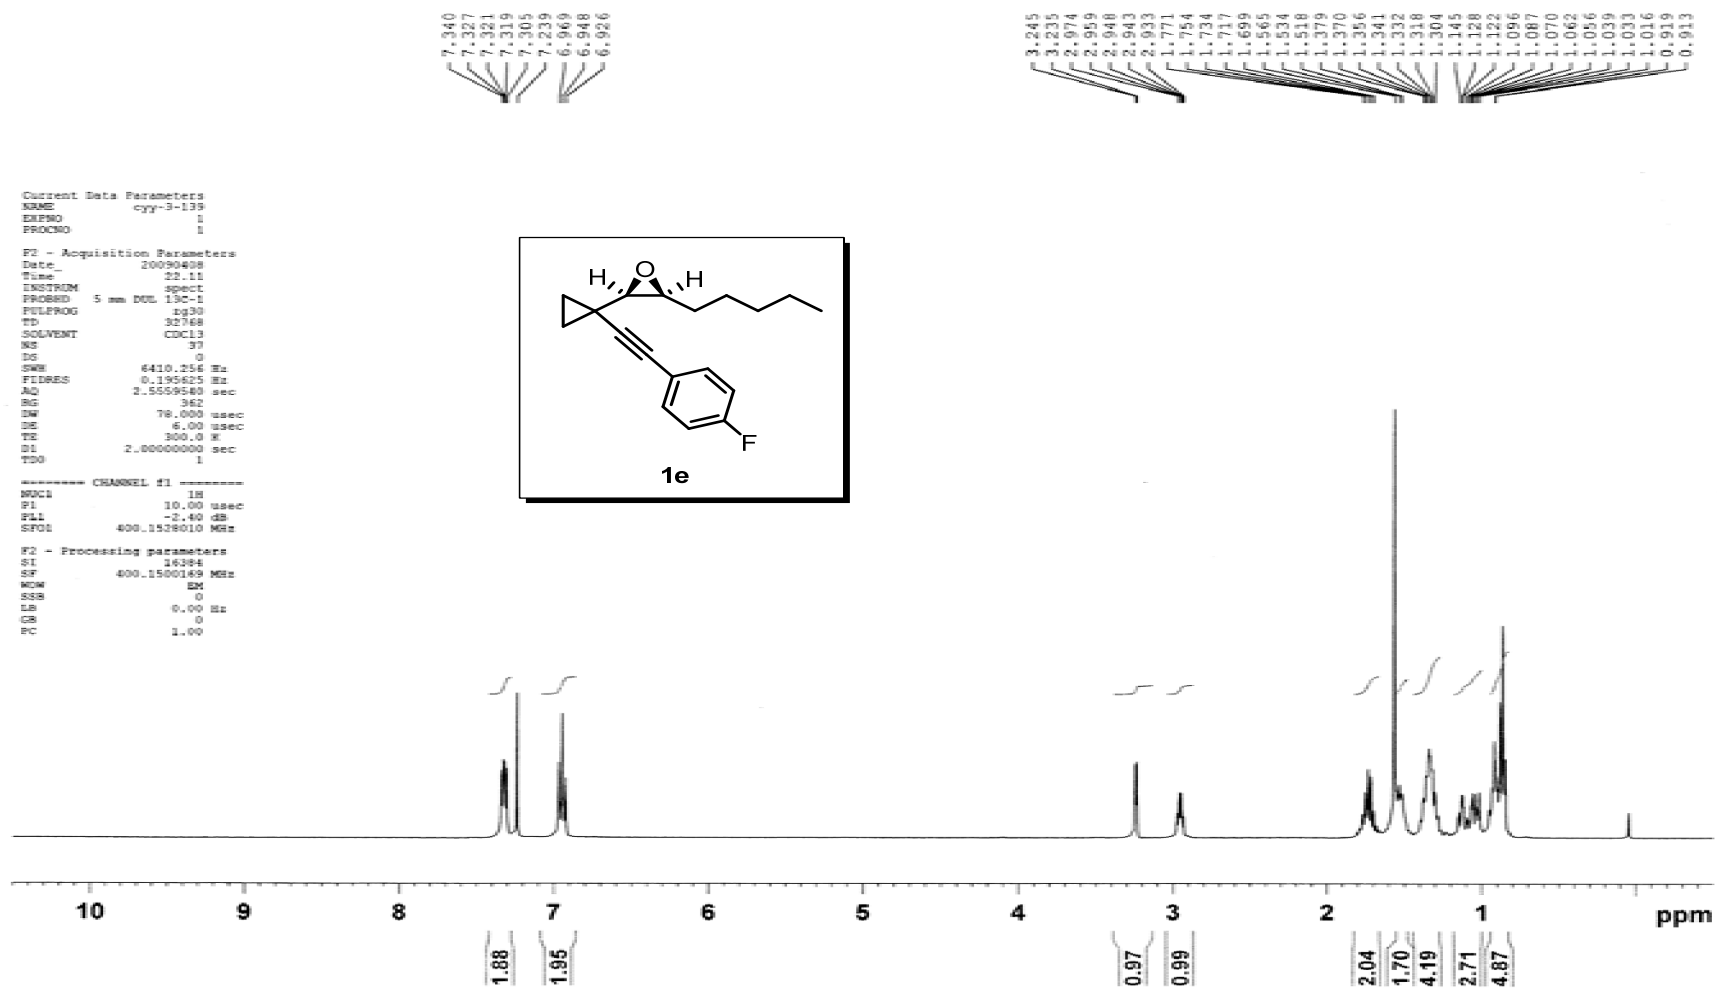

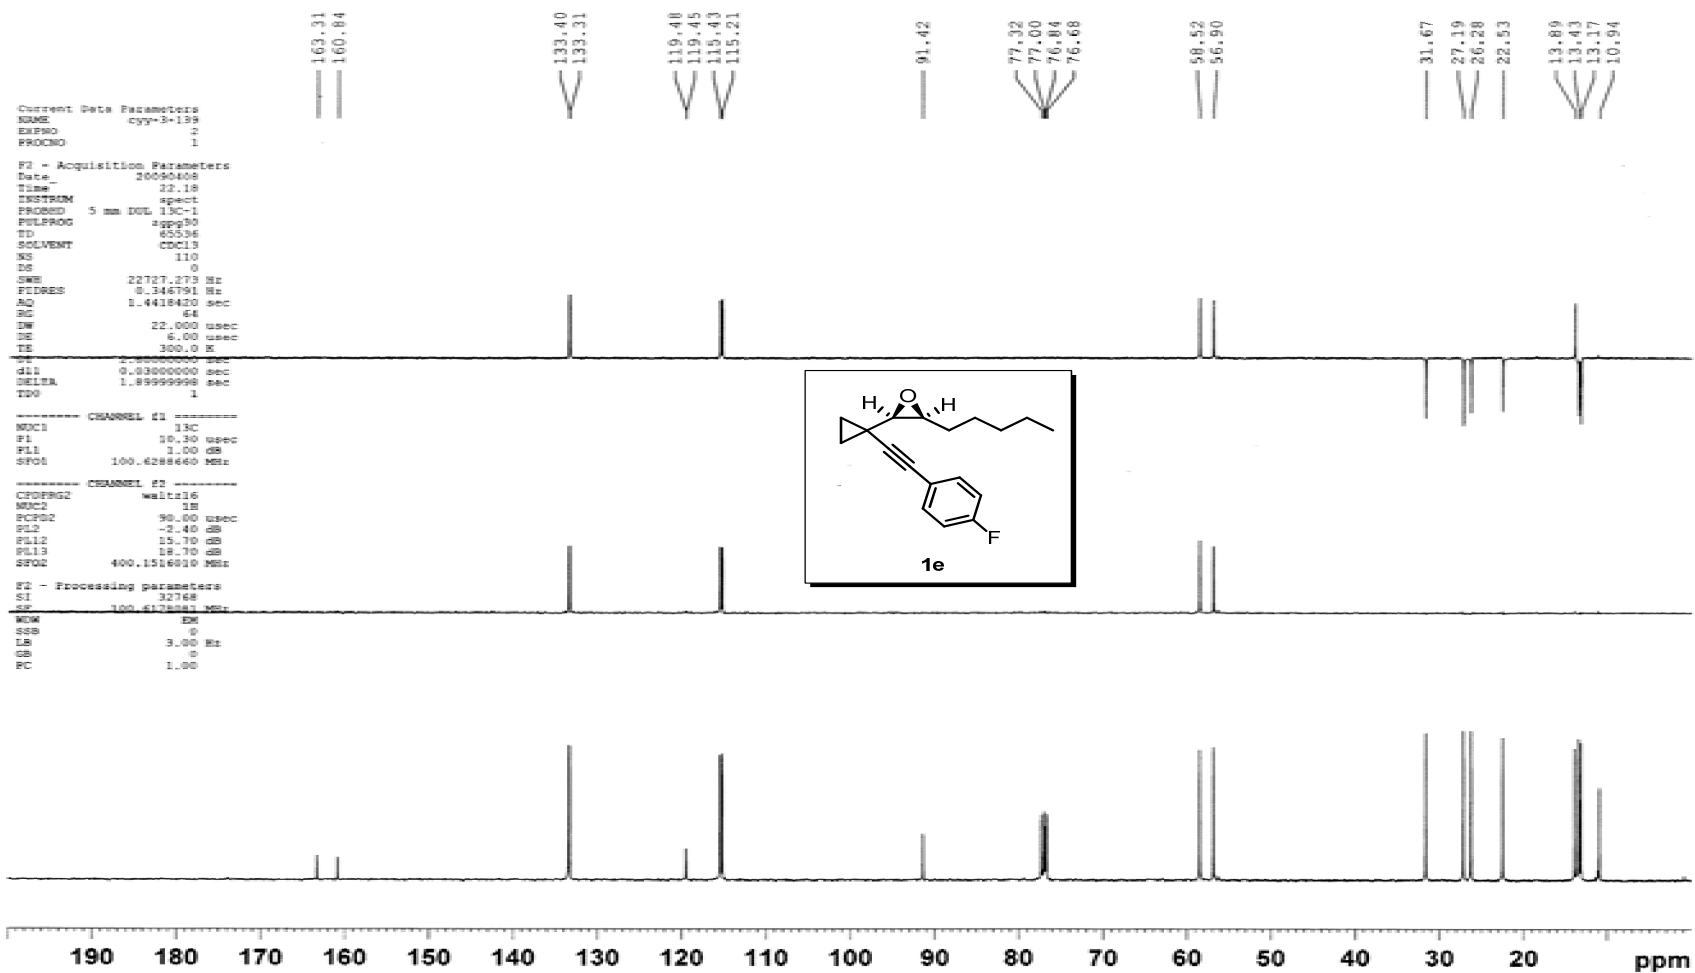

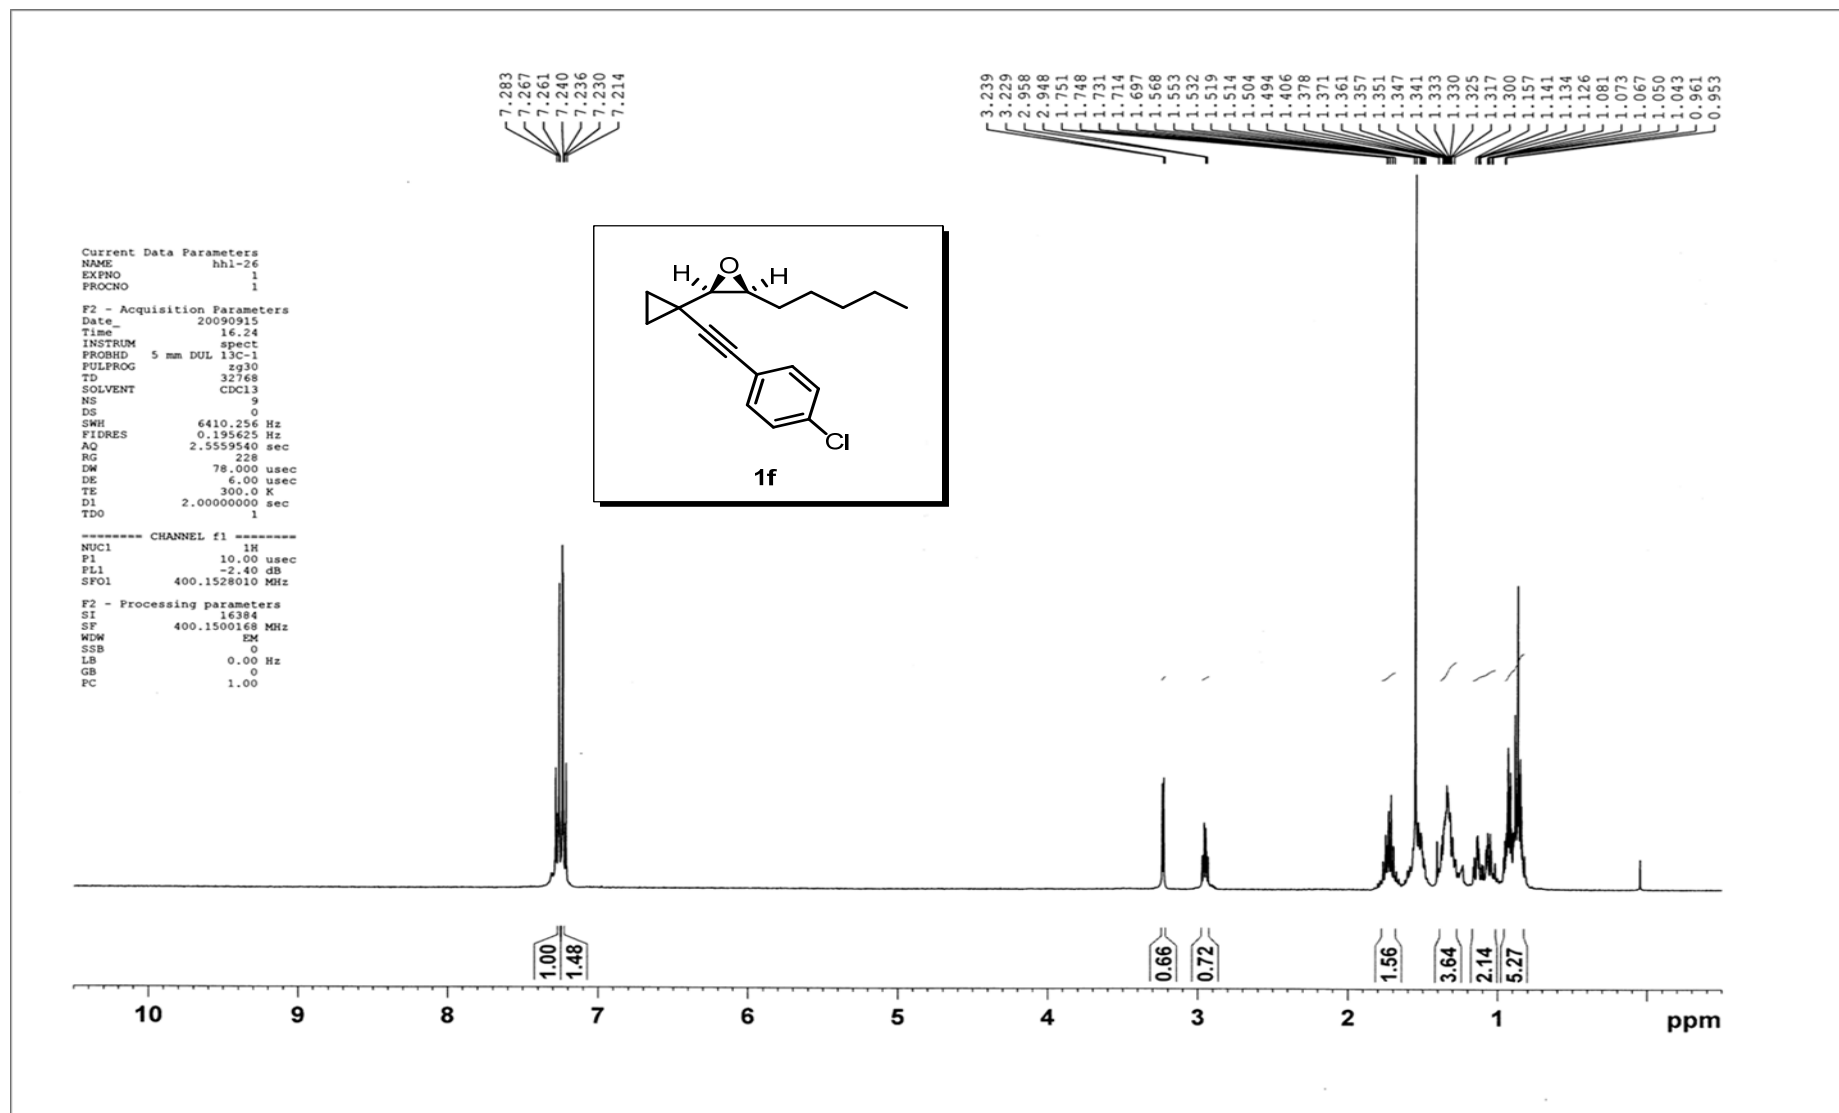

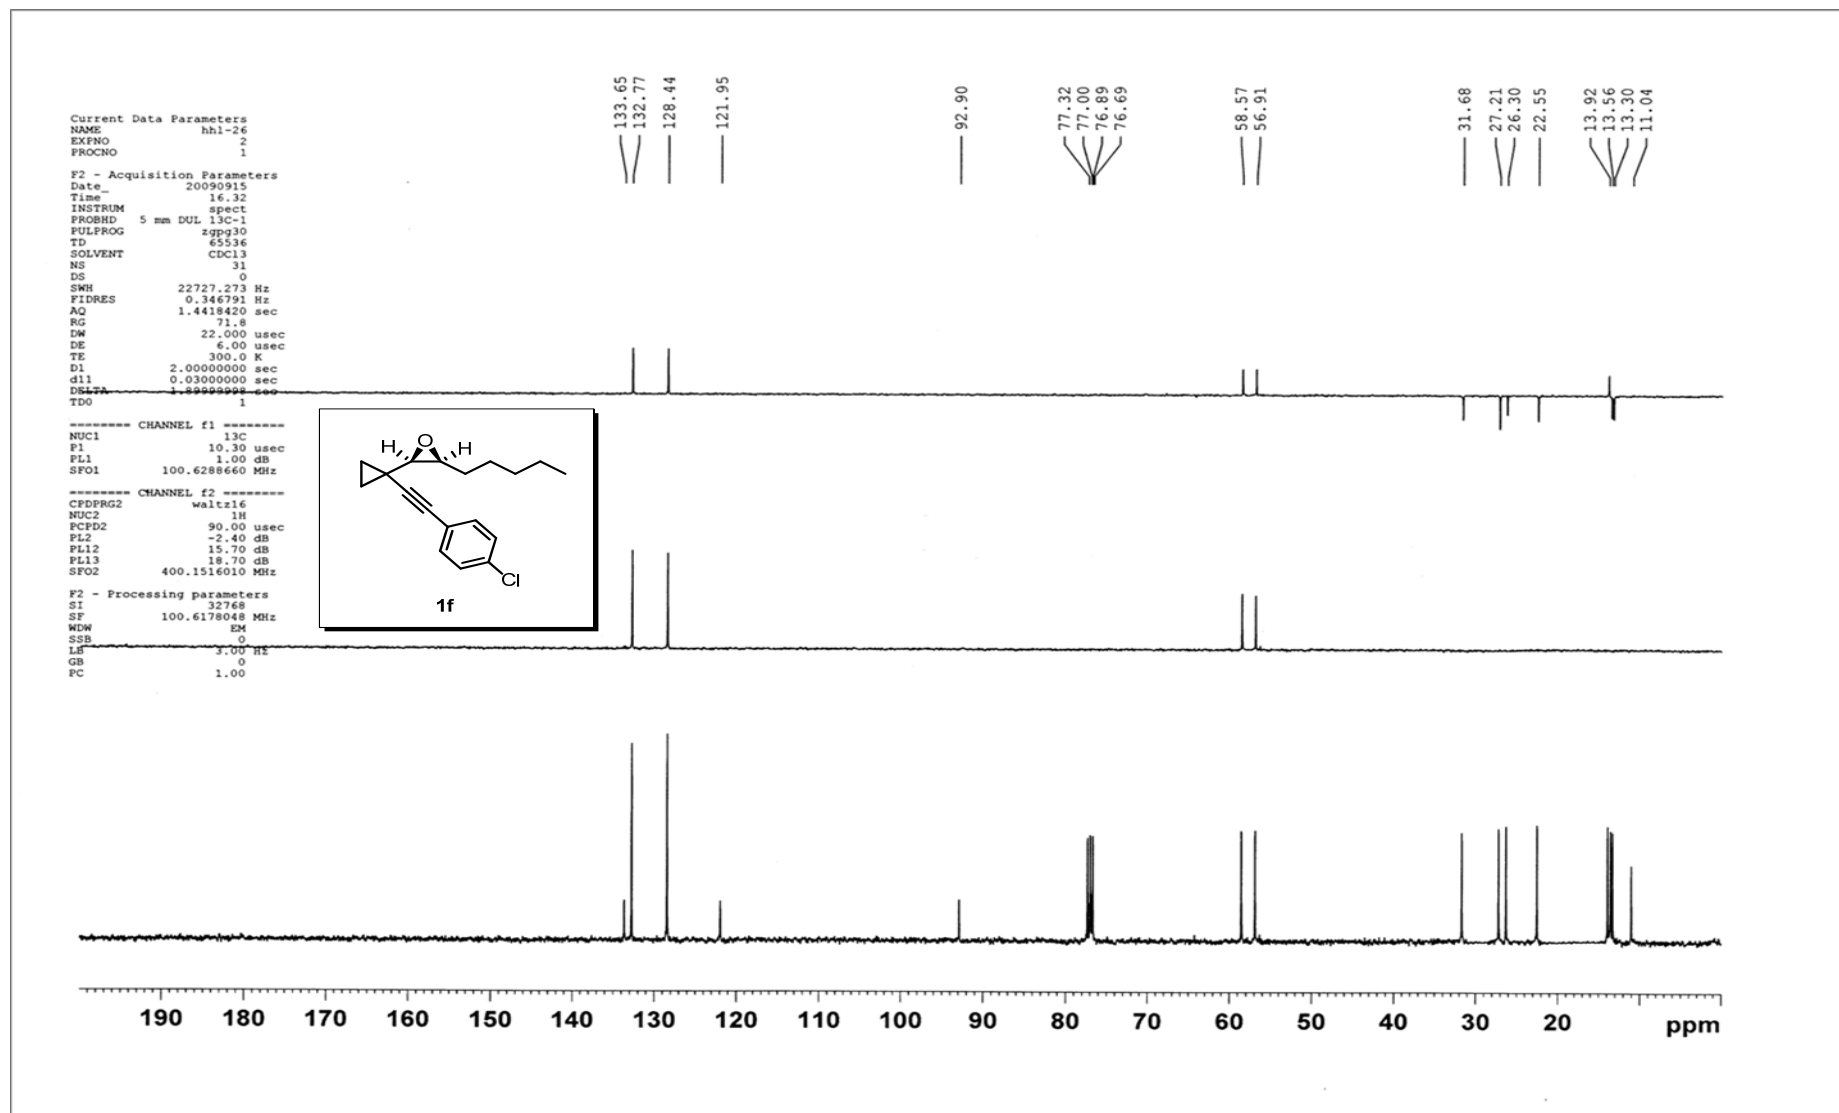

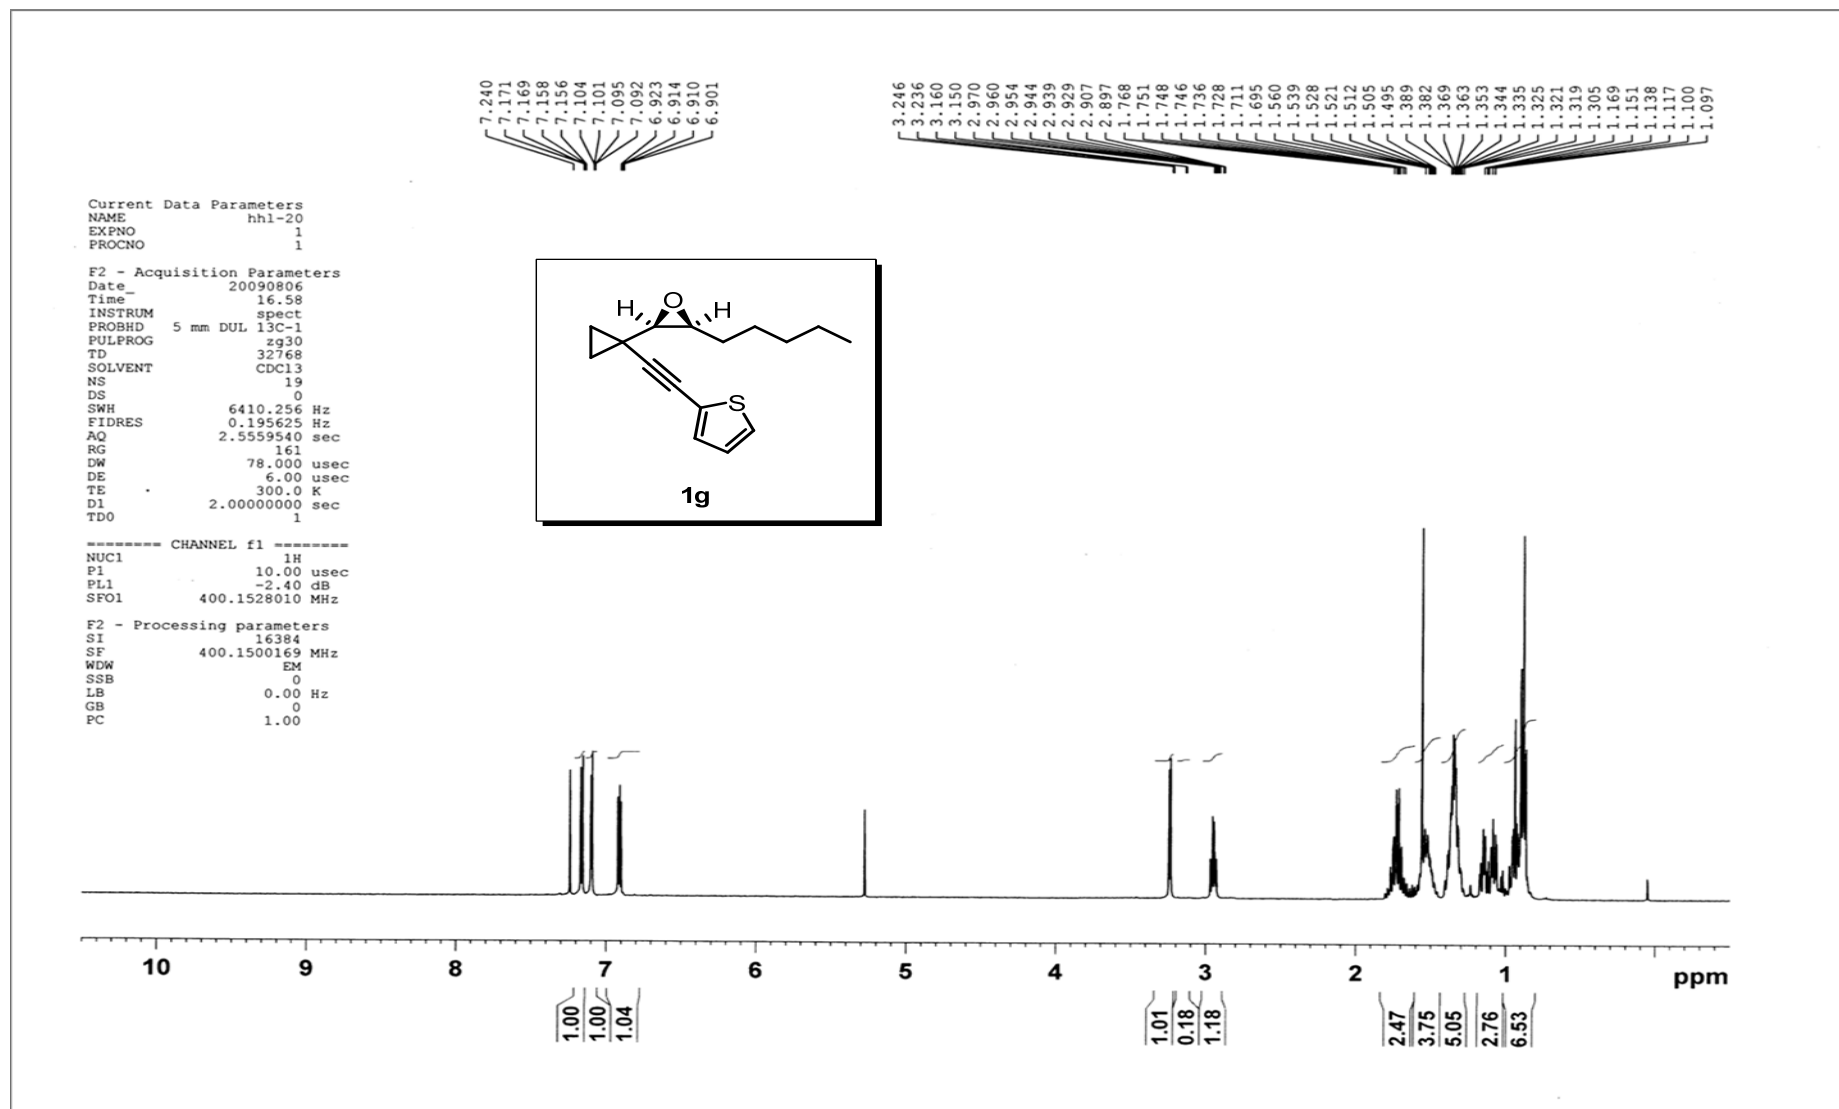

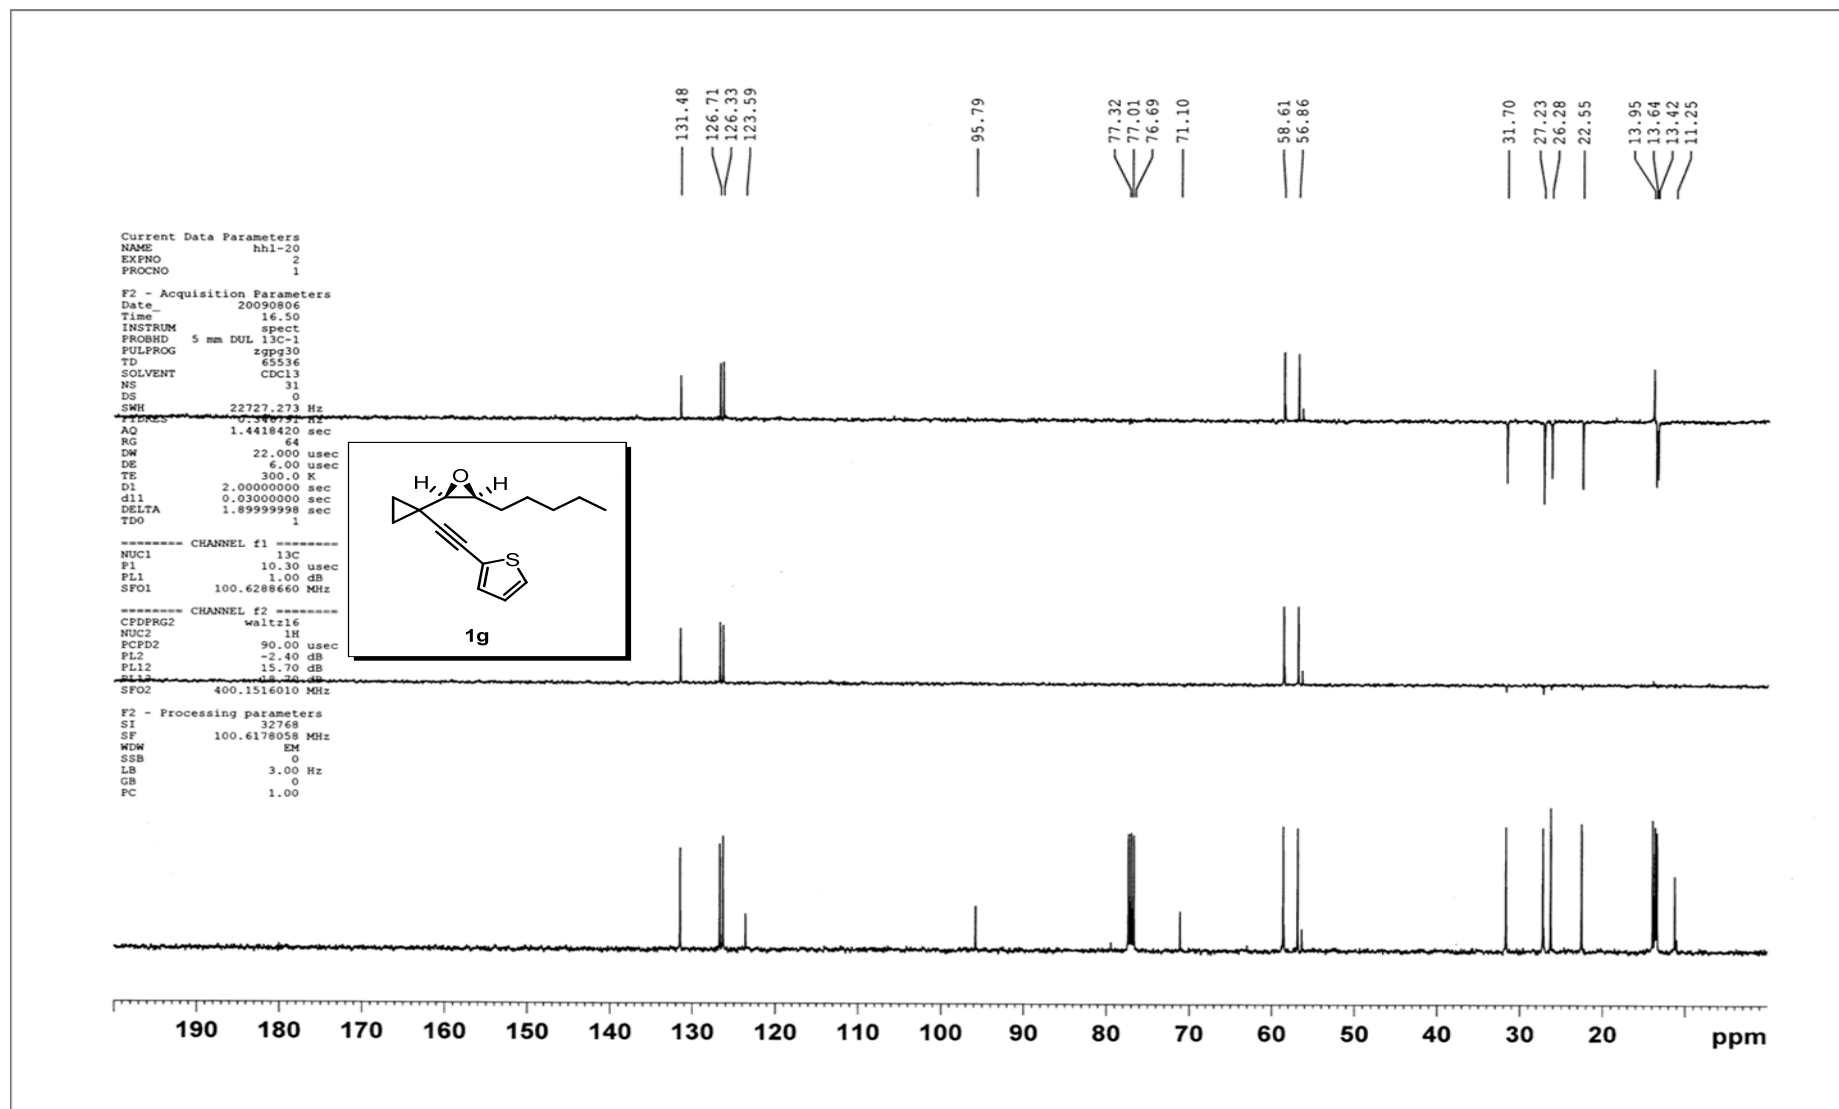

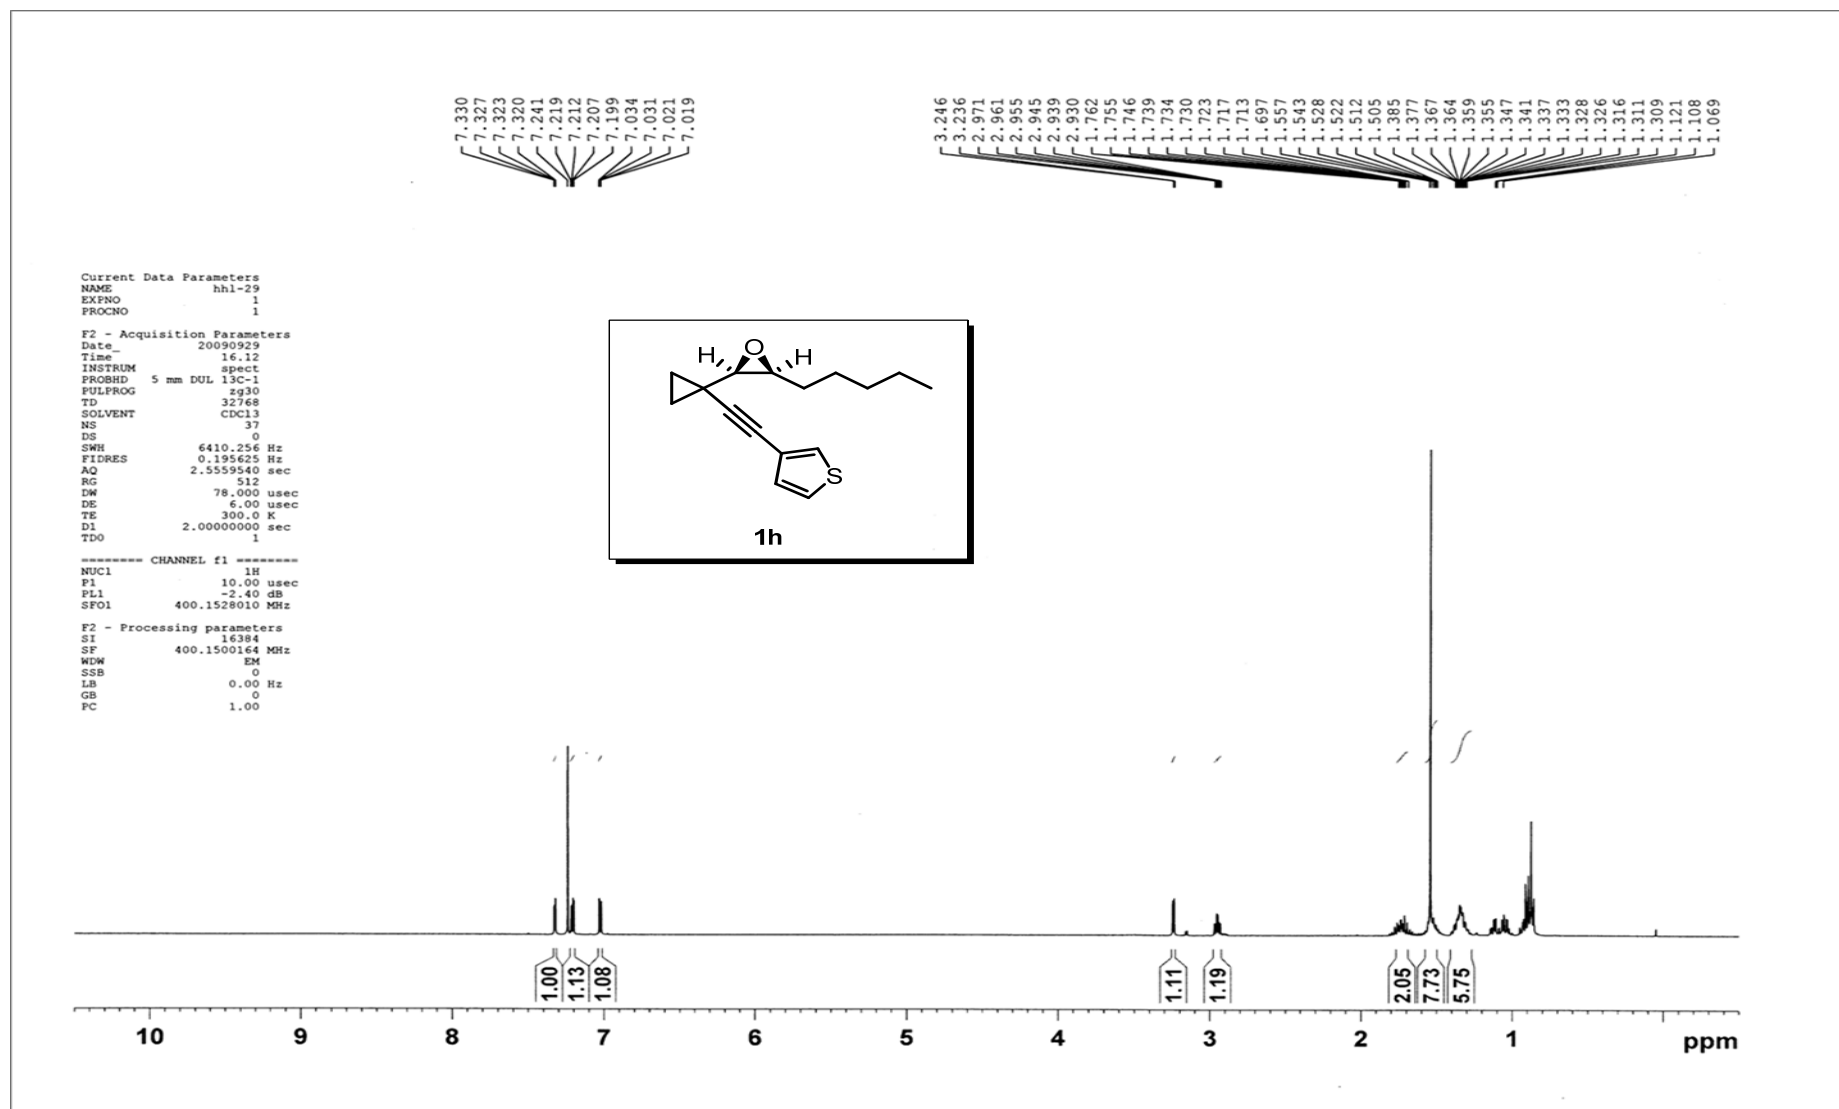



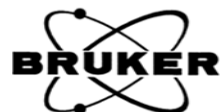

Current Data Parameters  
NAME hhl-29  
EXPNO 2  
PROCNO 1

F2 - Acquisition Parameters  
Date\_ 20090929  
Time 16.20  
INSTRUM spect  
PROBHD 5 mm DUL 13C-1  
PULPROG zgpg30  
TD 65536  
SOLVENT CDCl3

NS 46  
DS 0  
SWH 22727.273 Hz  
FIDRES 0.346791 Hz  
AQ 1.4418420 sec  
RG 71.8  
DW 22.000 usec  
DE 6.00 usec  
TE 300.0 K  
D1 2.0000000 sec  
d11 0.03000000 sec  
DELTA 1.89999998 sec  
TDO 1

----- CHANNEL f1 -----  
NUC1 13C  
P1 10.30 usec  
PL1 1.00 dB  
SFO1 100.6288660 MHz

----- CHANNEL f2 -----  
CPDPRG2 waltz16  
NUC2 1H  
PCPD2 90.00 usec  
PL2 -2.40 dB  
PL12 15.70 dB  
PL13 18.70 dB  
SFO2 400.1516010 MHz

F2 - Processing parameters  
SI 32768  
SF 100.6178090 MHz  
WDW EM  
SSB 0  
LB 3.00 Hz  
GB 0  
PC 1.00

129.89  
128.02  
124.96  
122.36

91.23

77.32  
77.00  
76.68  
72.98

58.57  
56.94

31.66  
27.18  
26.27  
22.52

13.91  
13.40  
13.17  
10.99

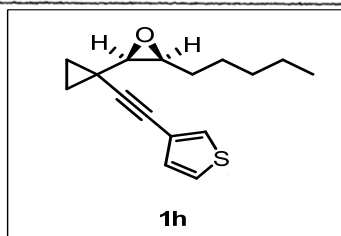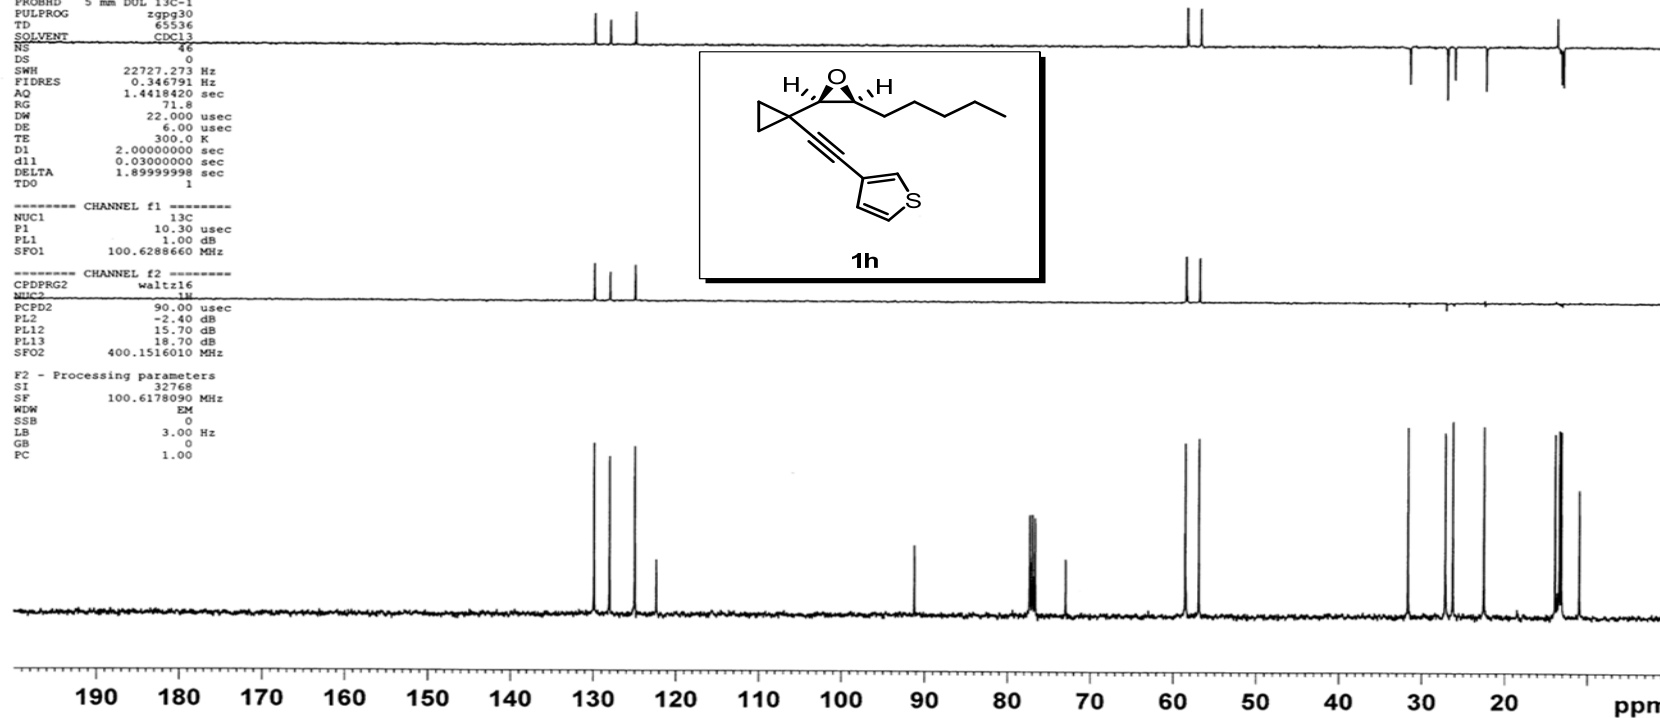

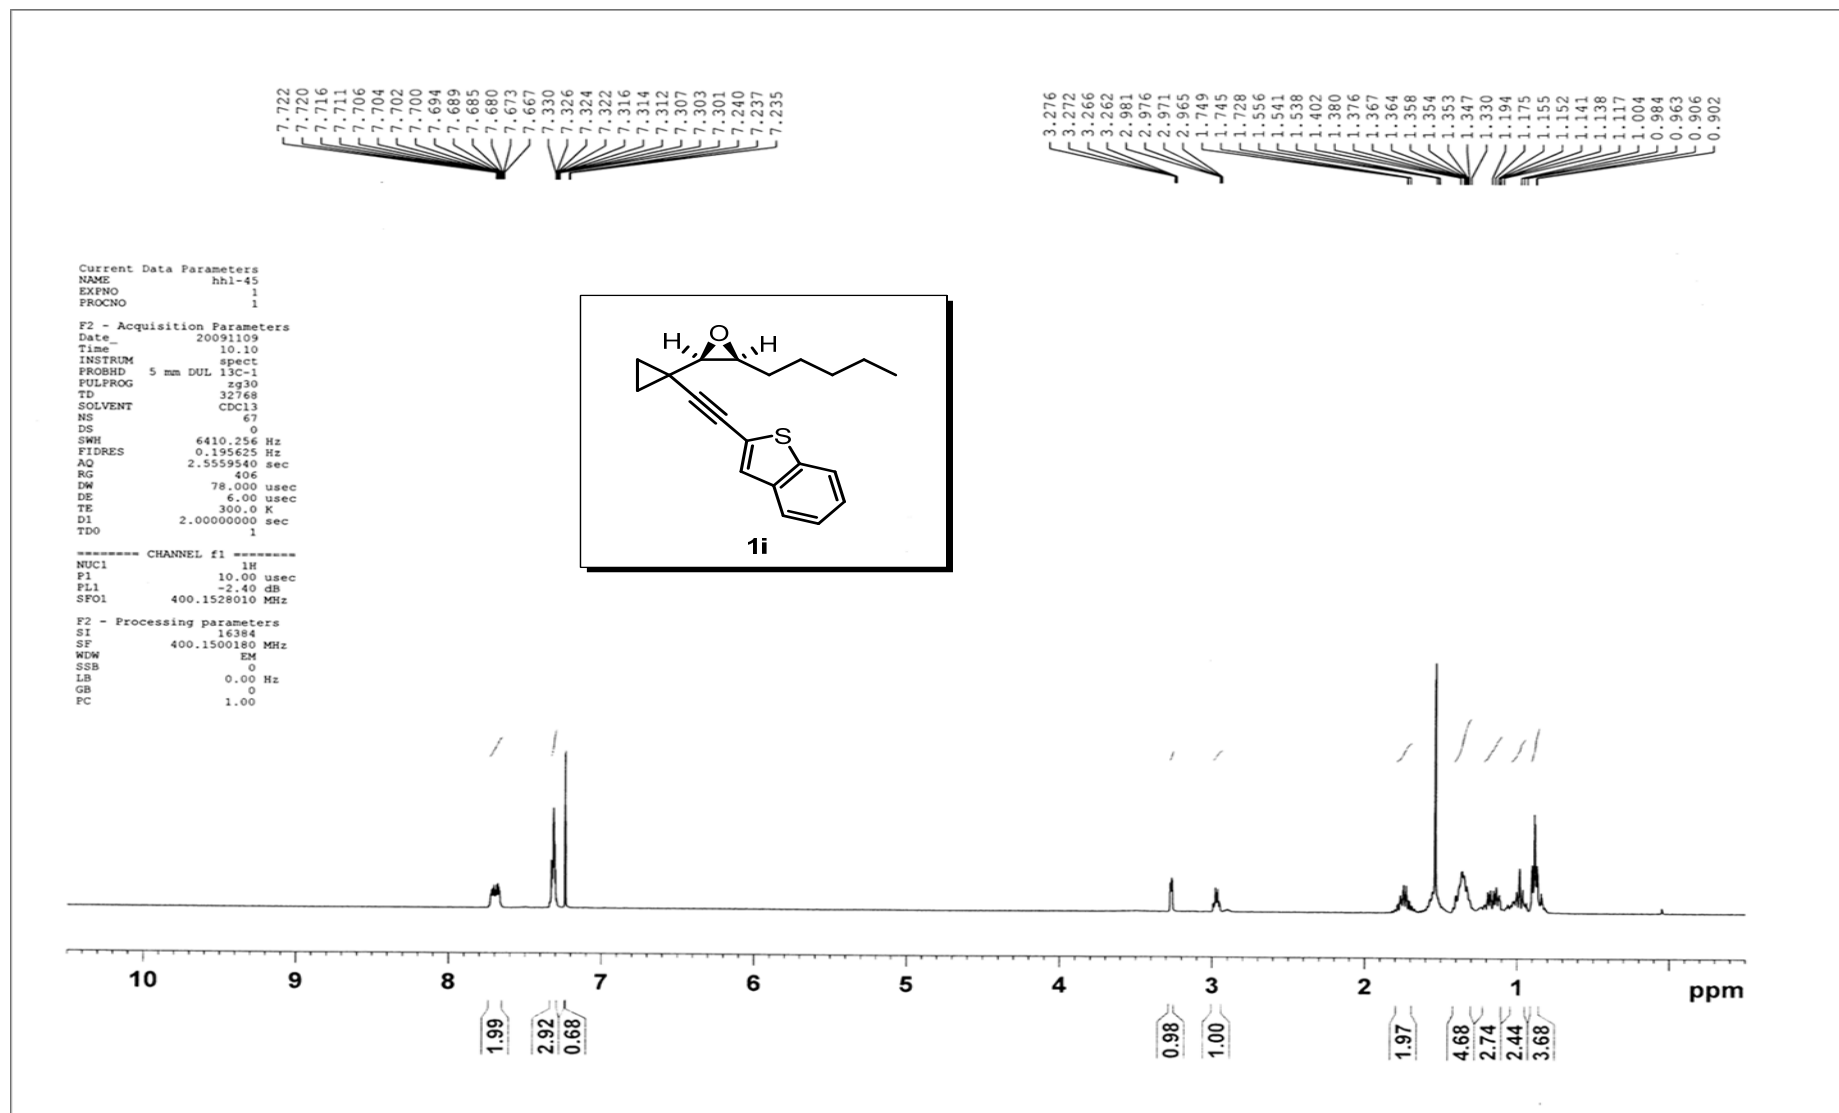

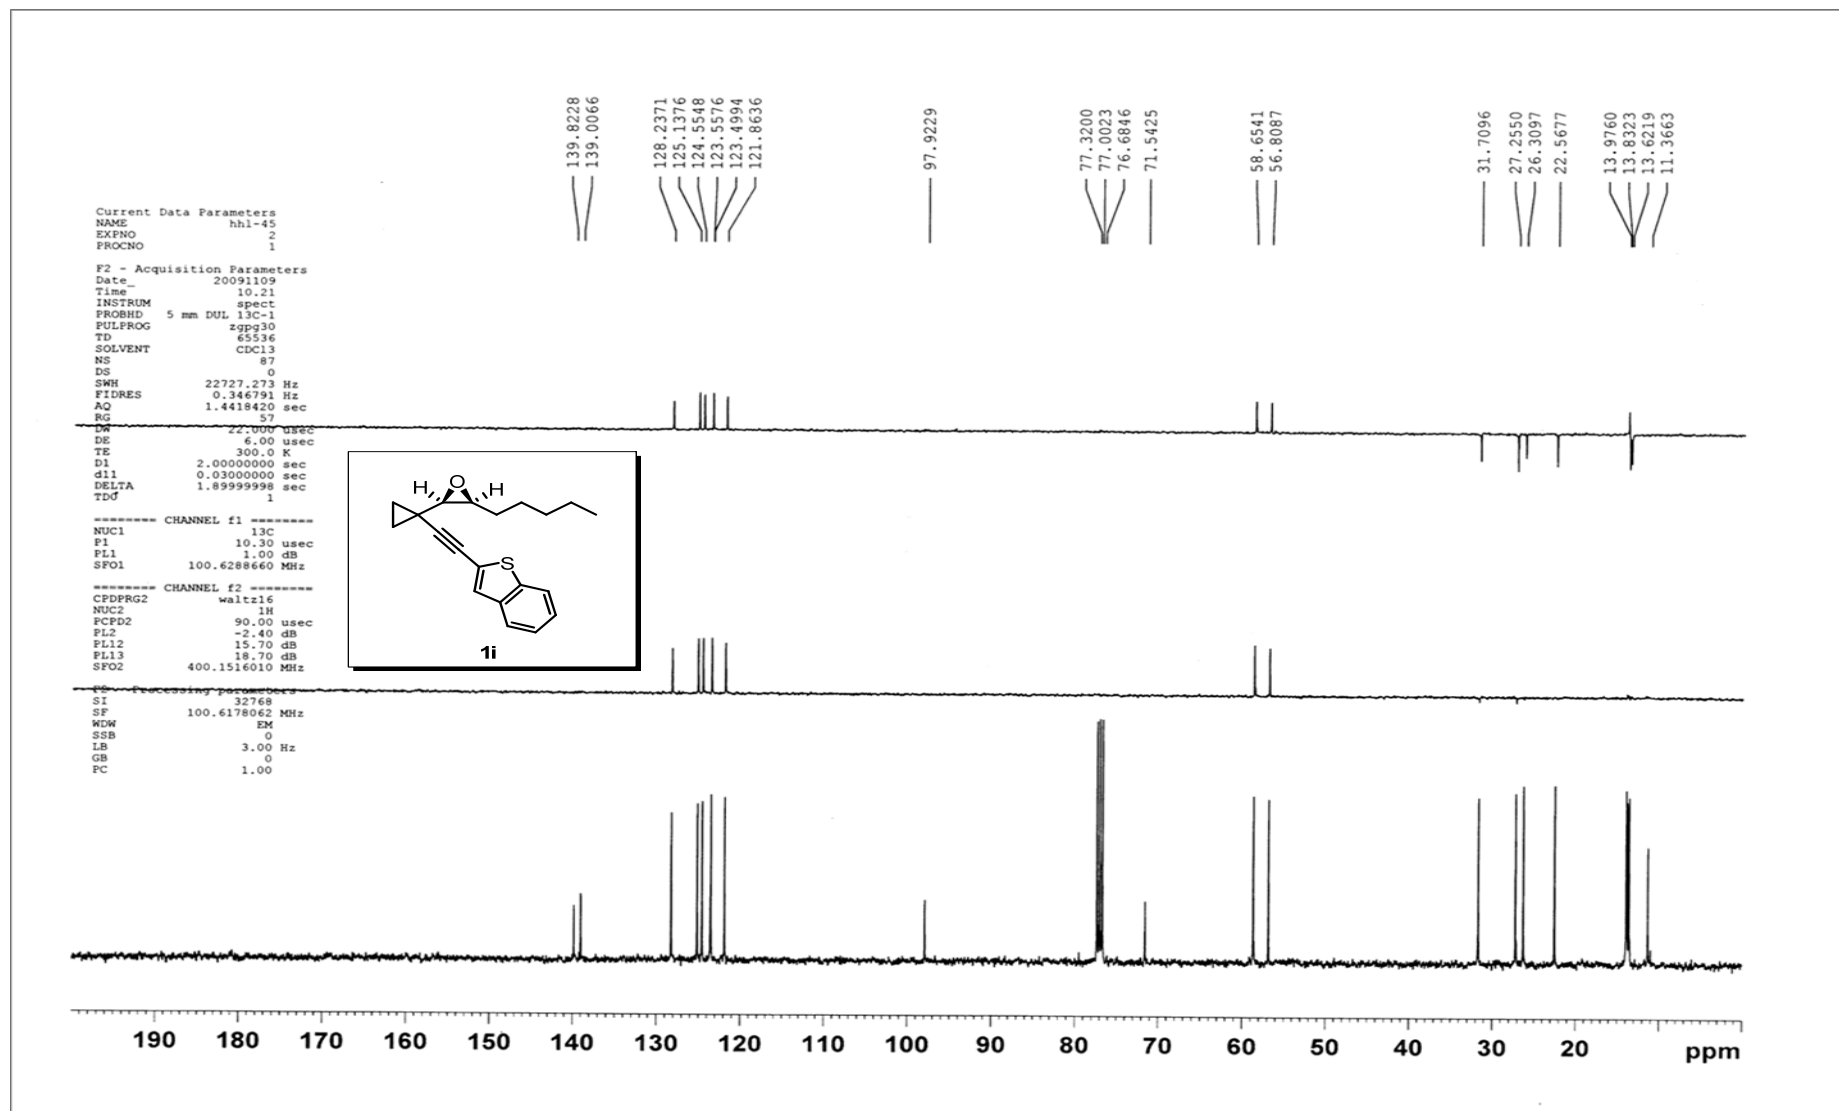

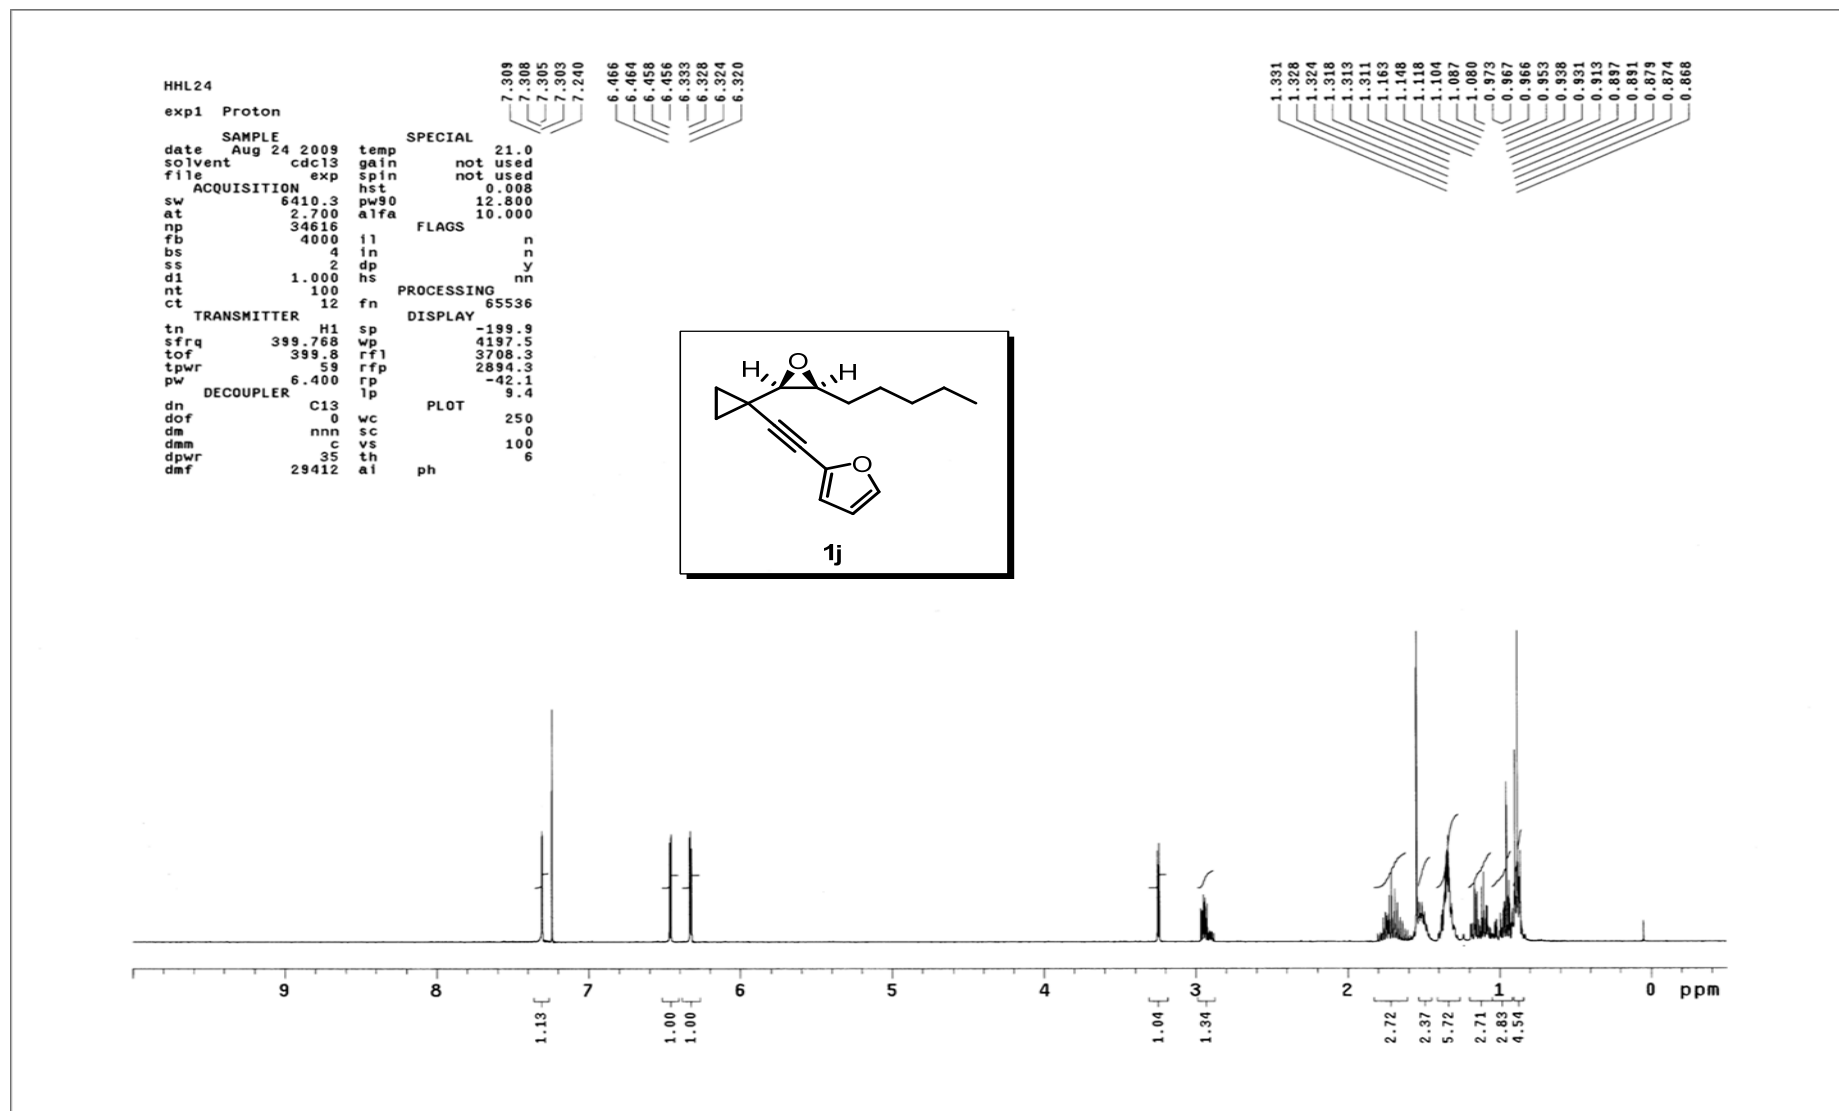

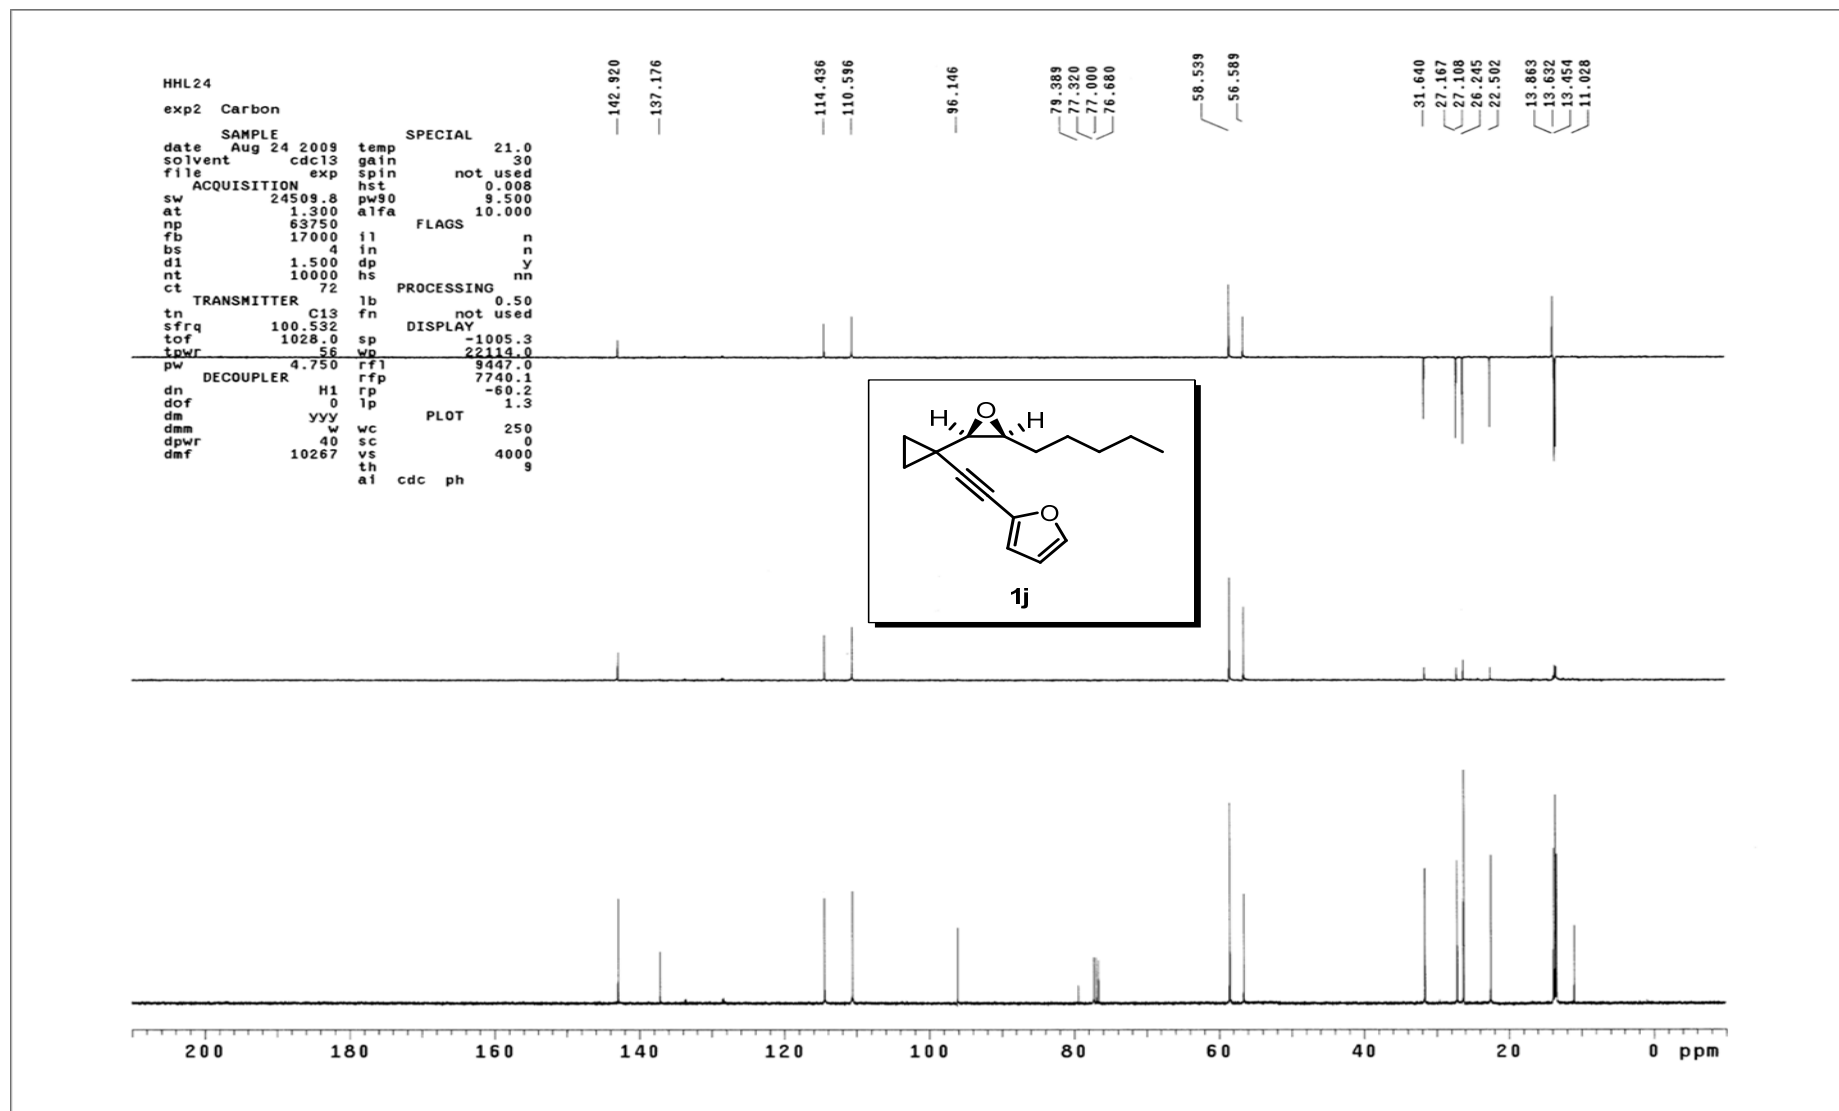

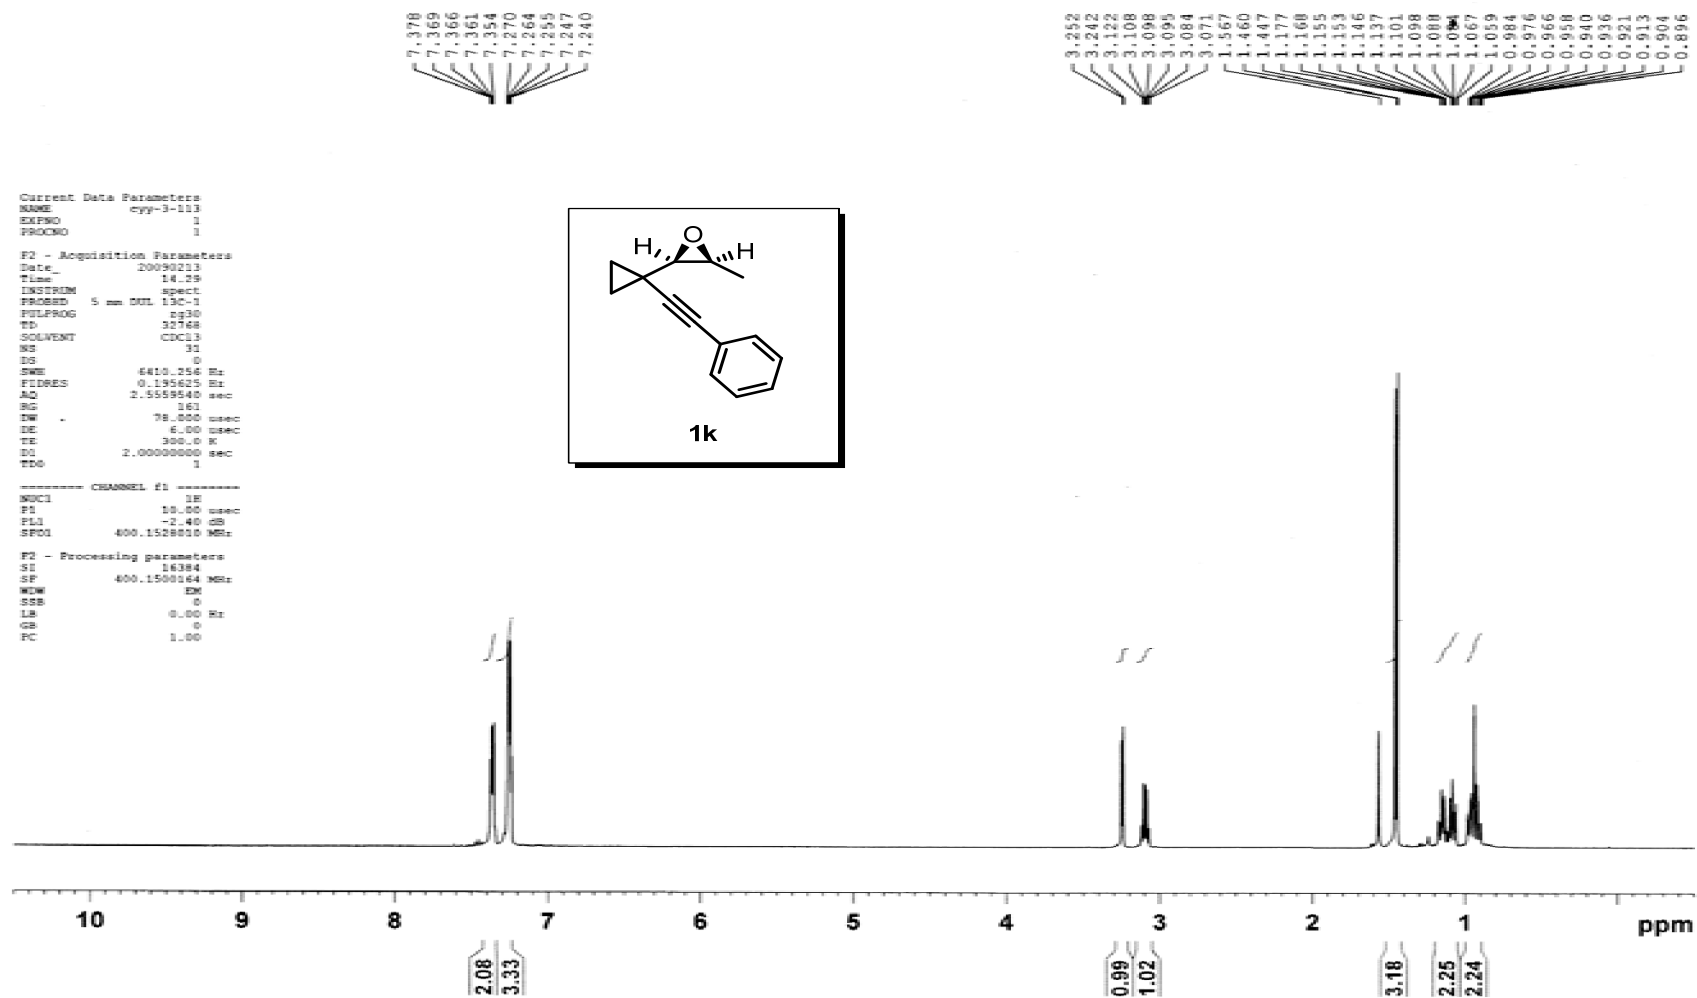

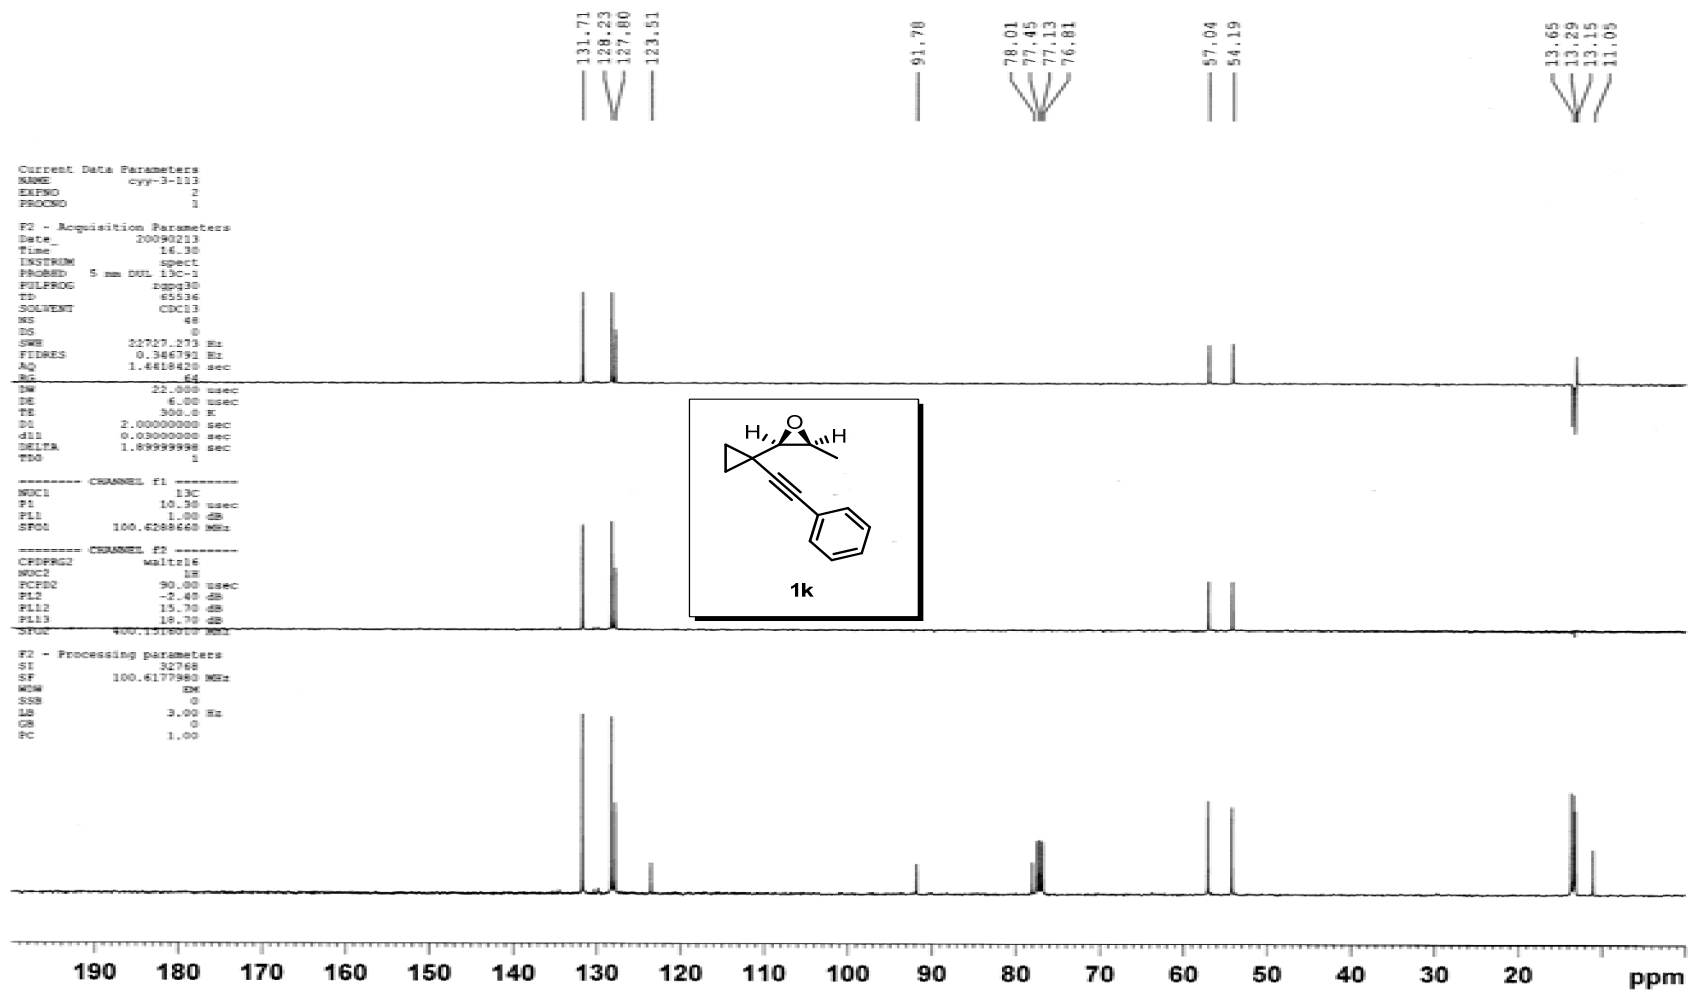

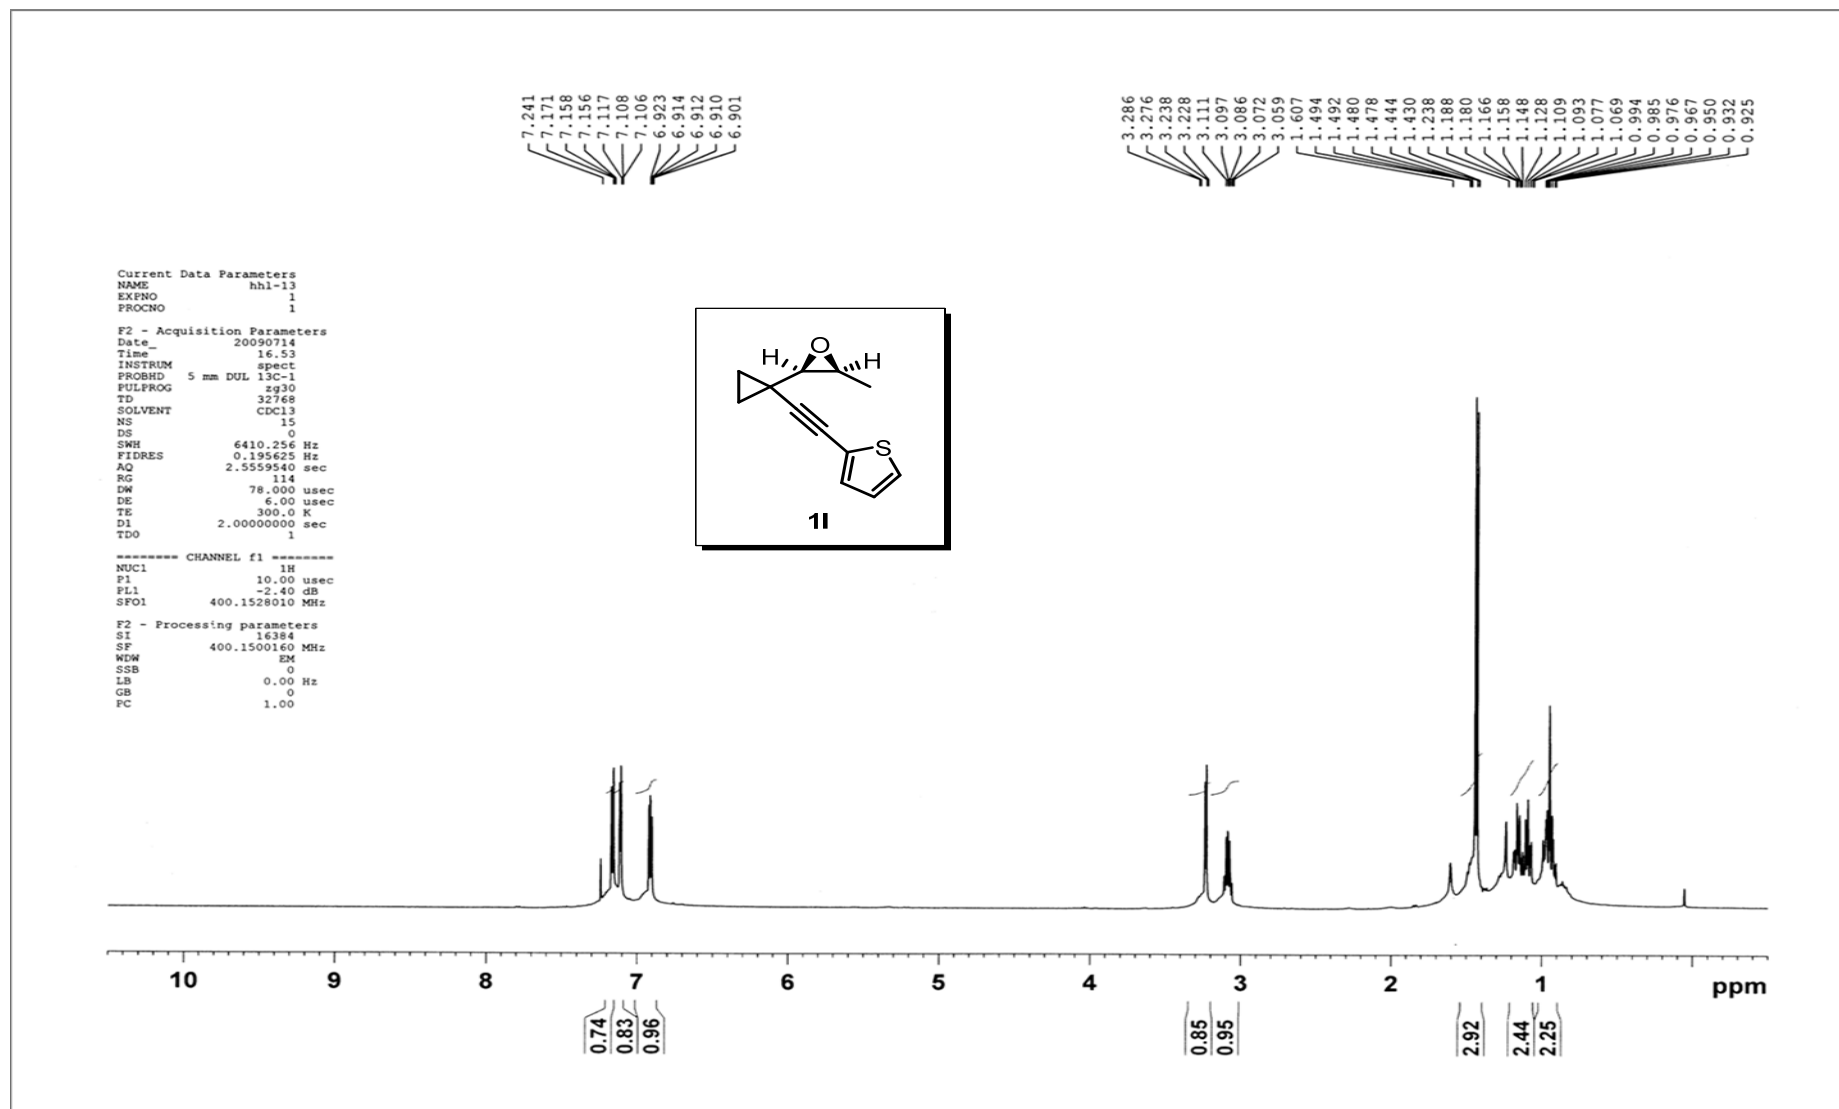



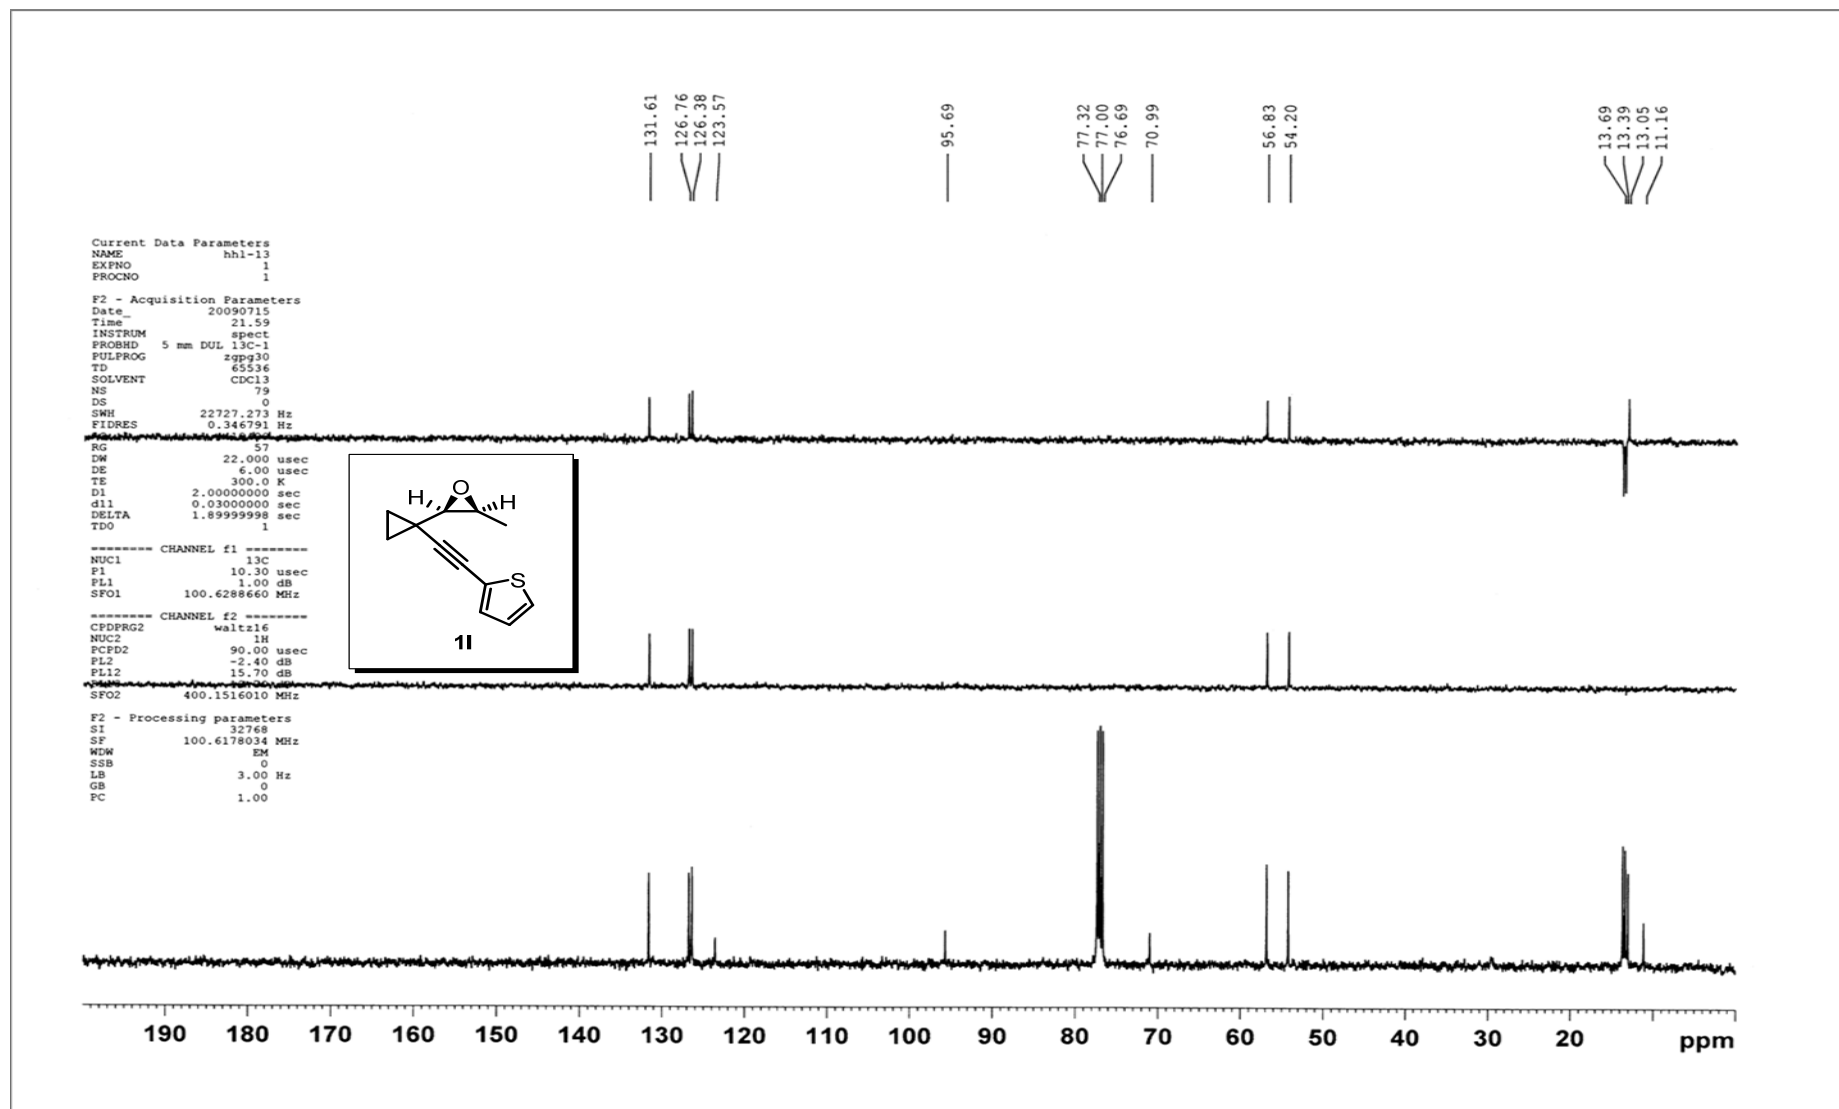

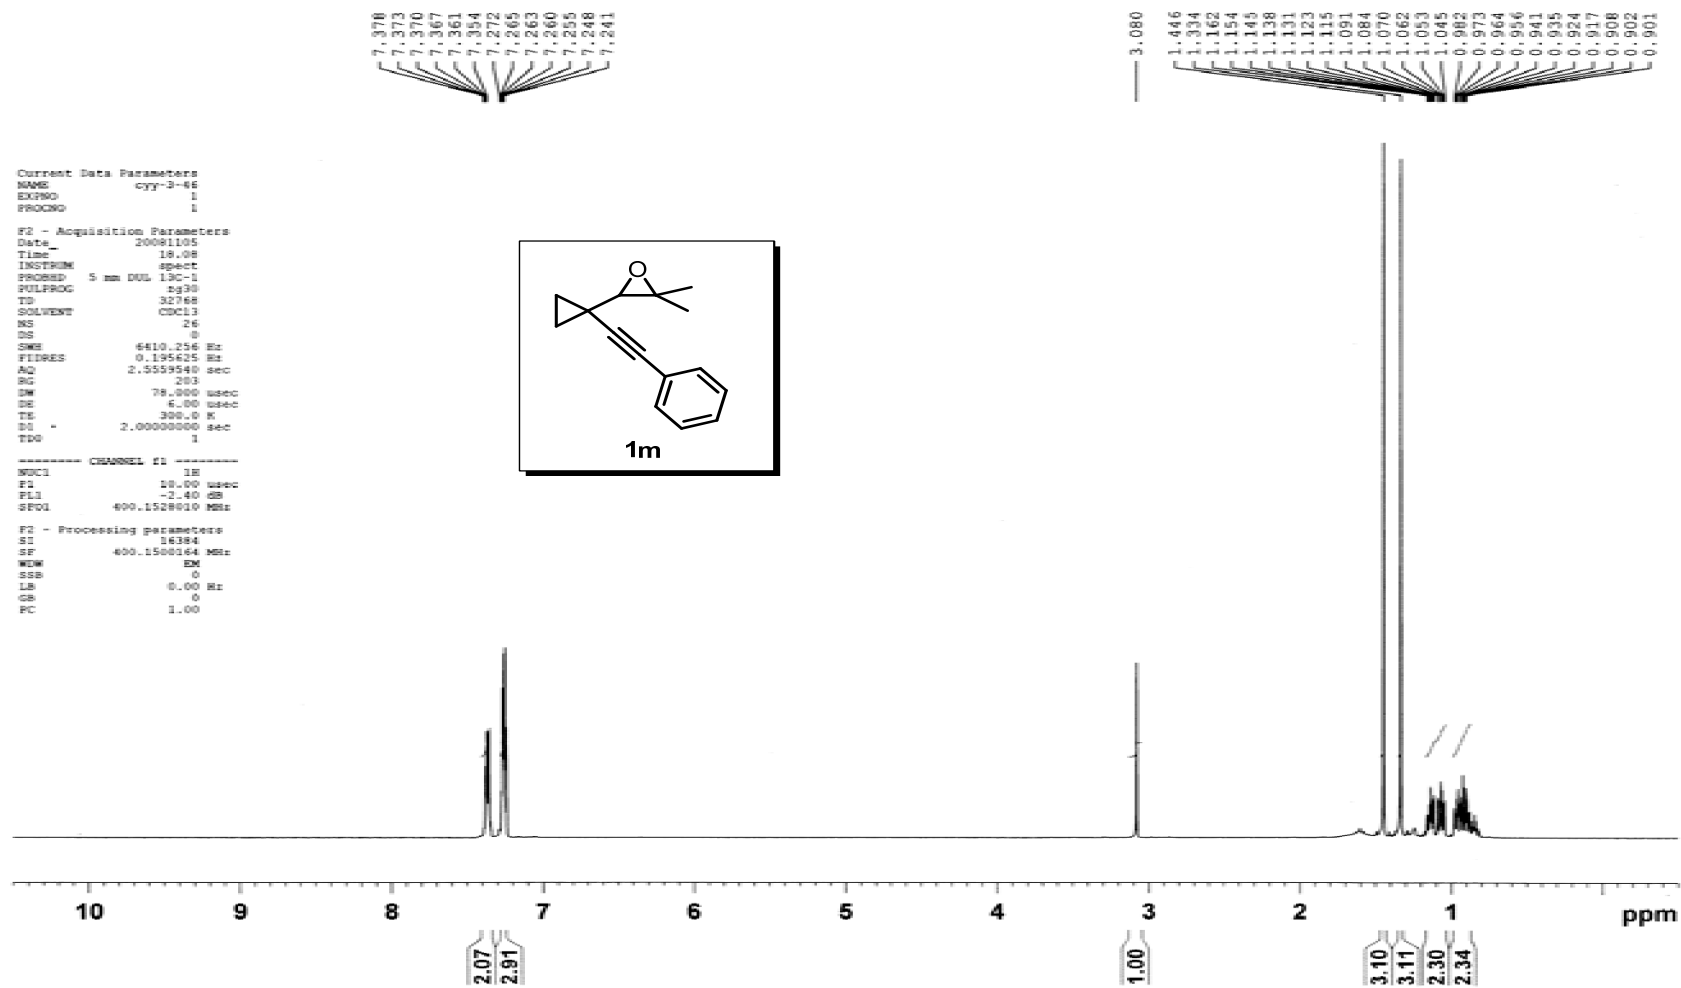

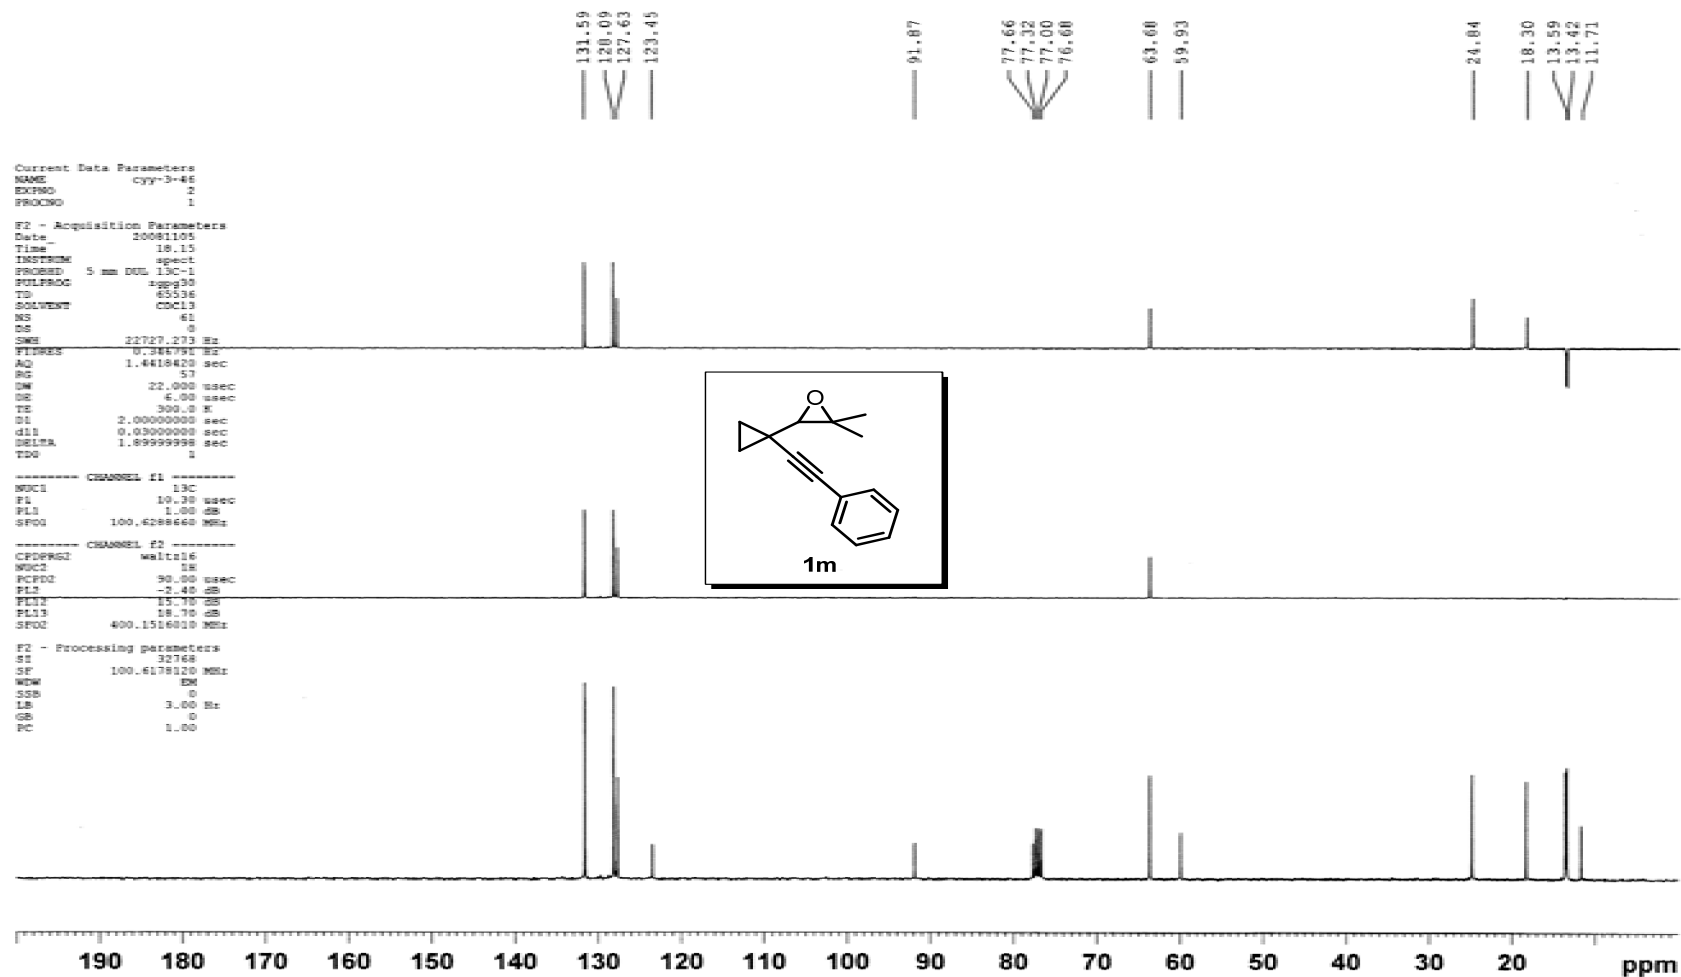

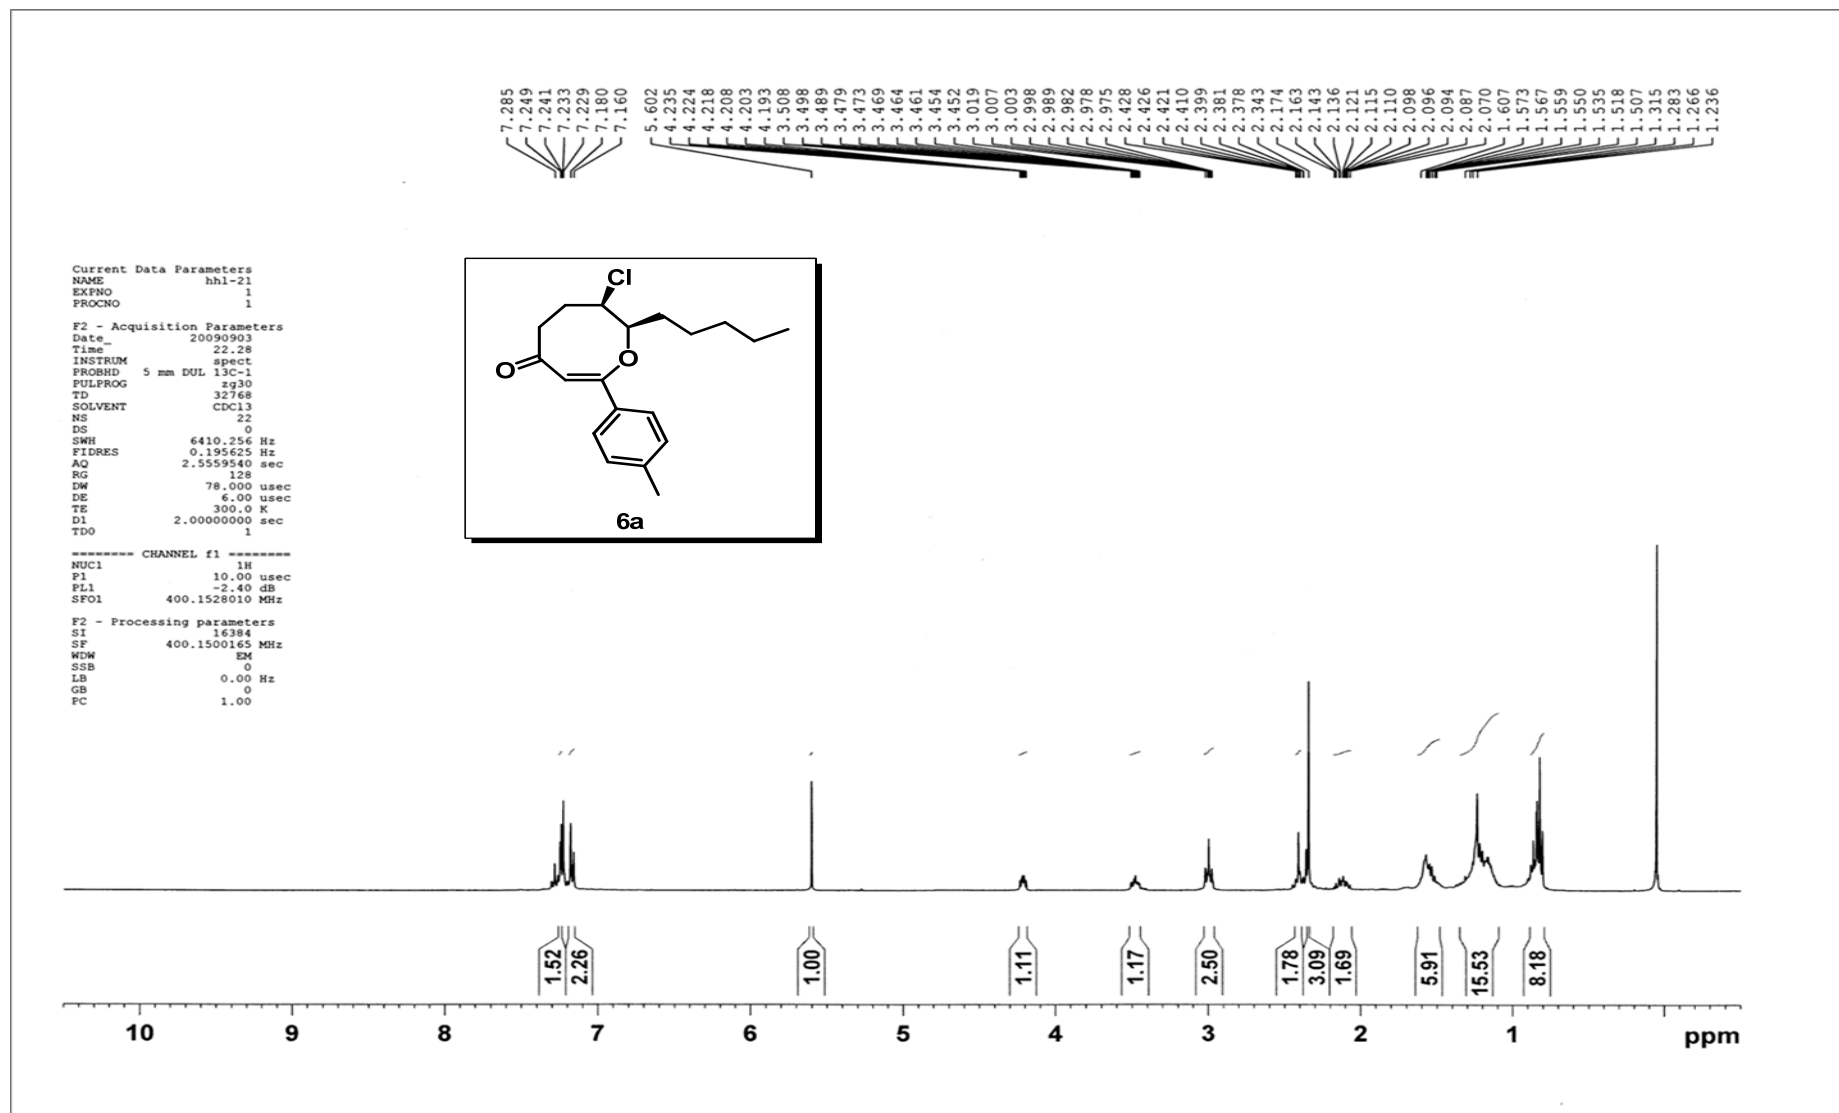

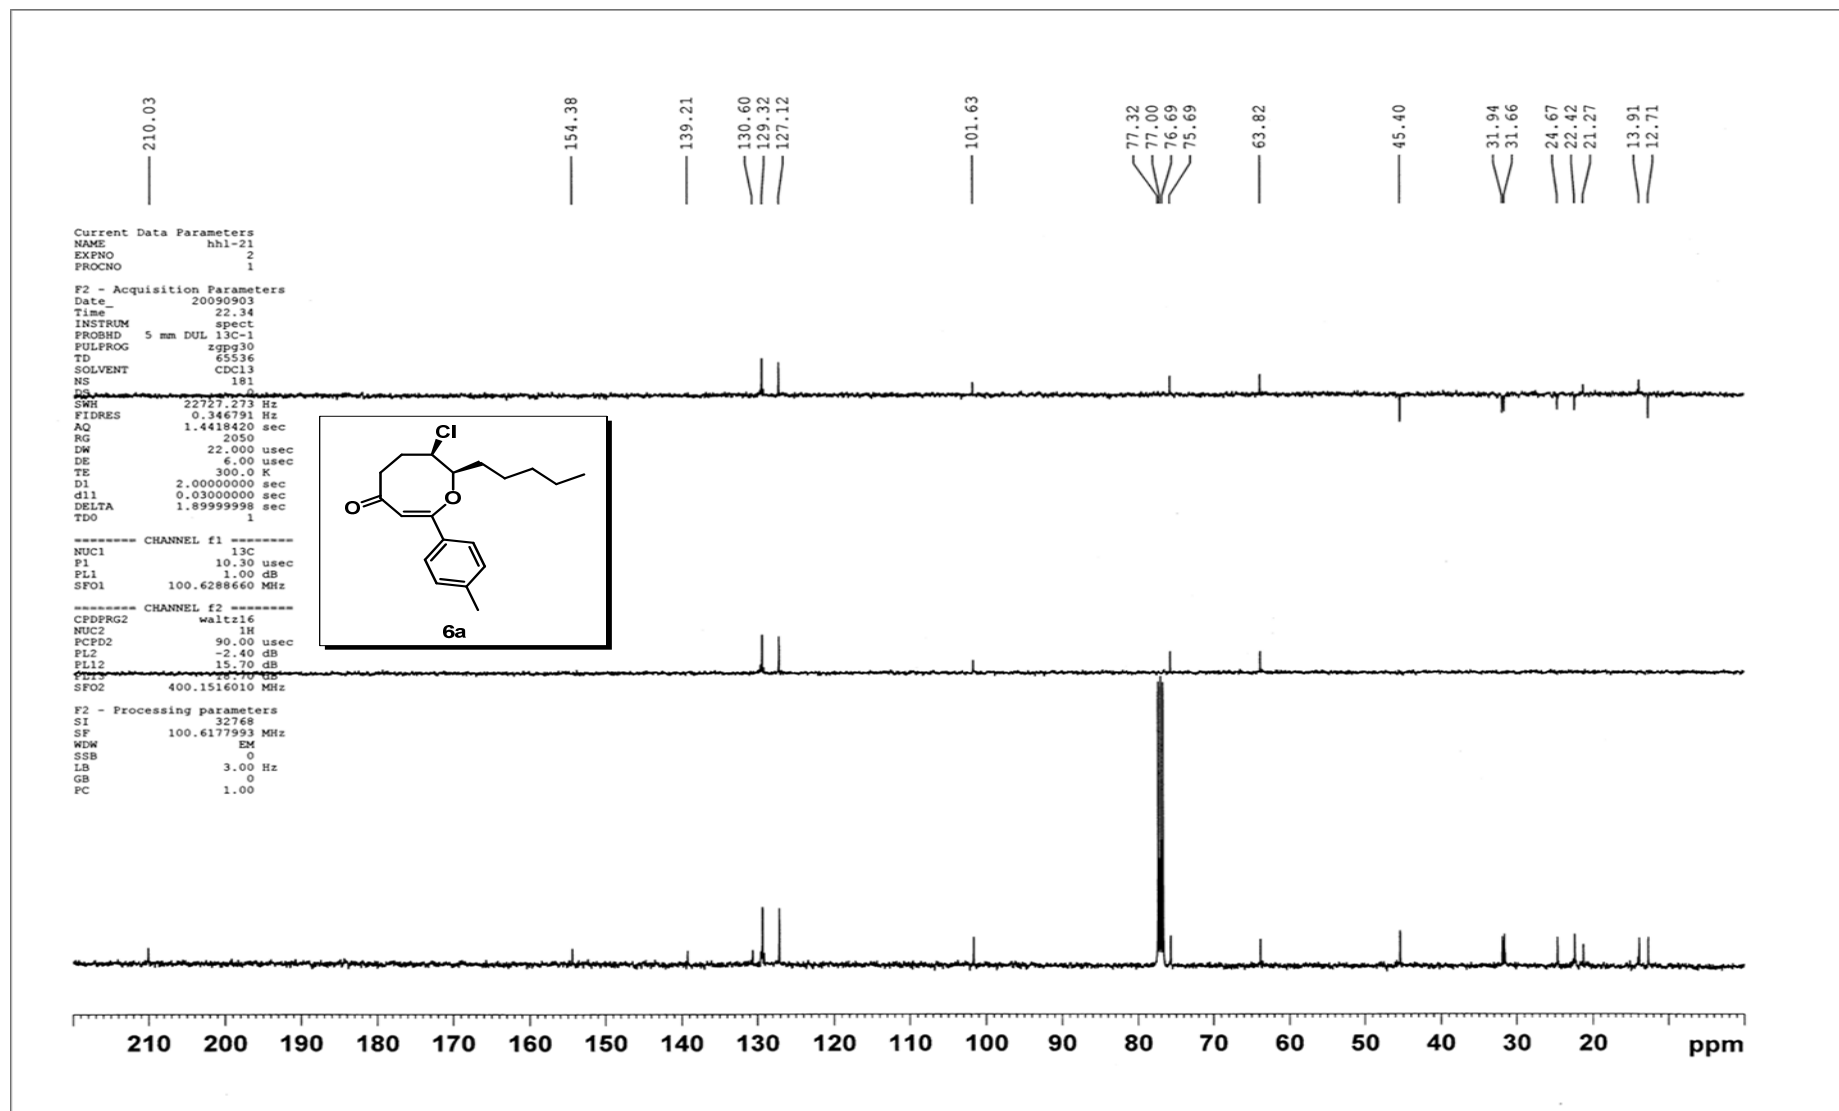

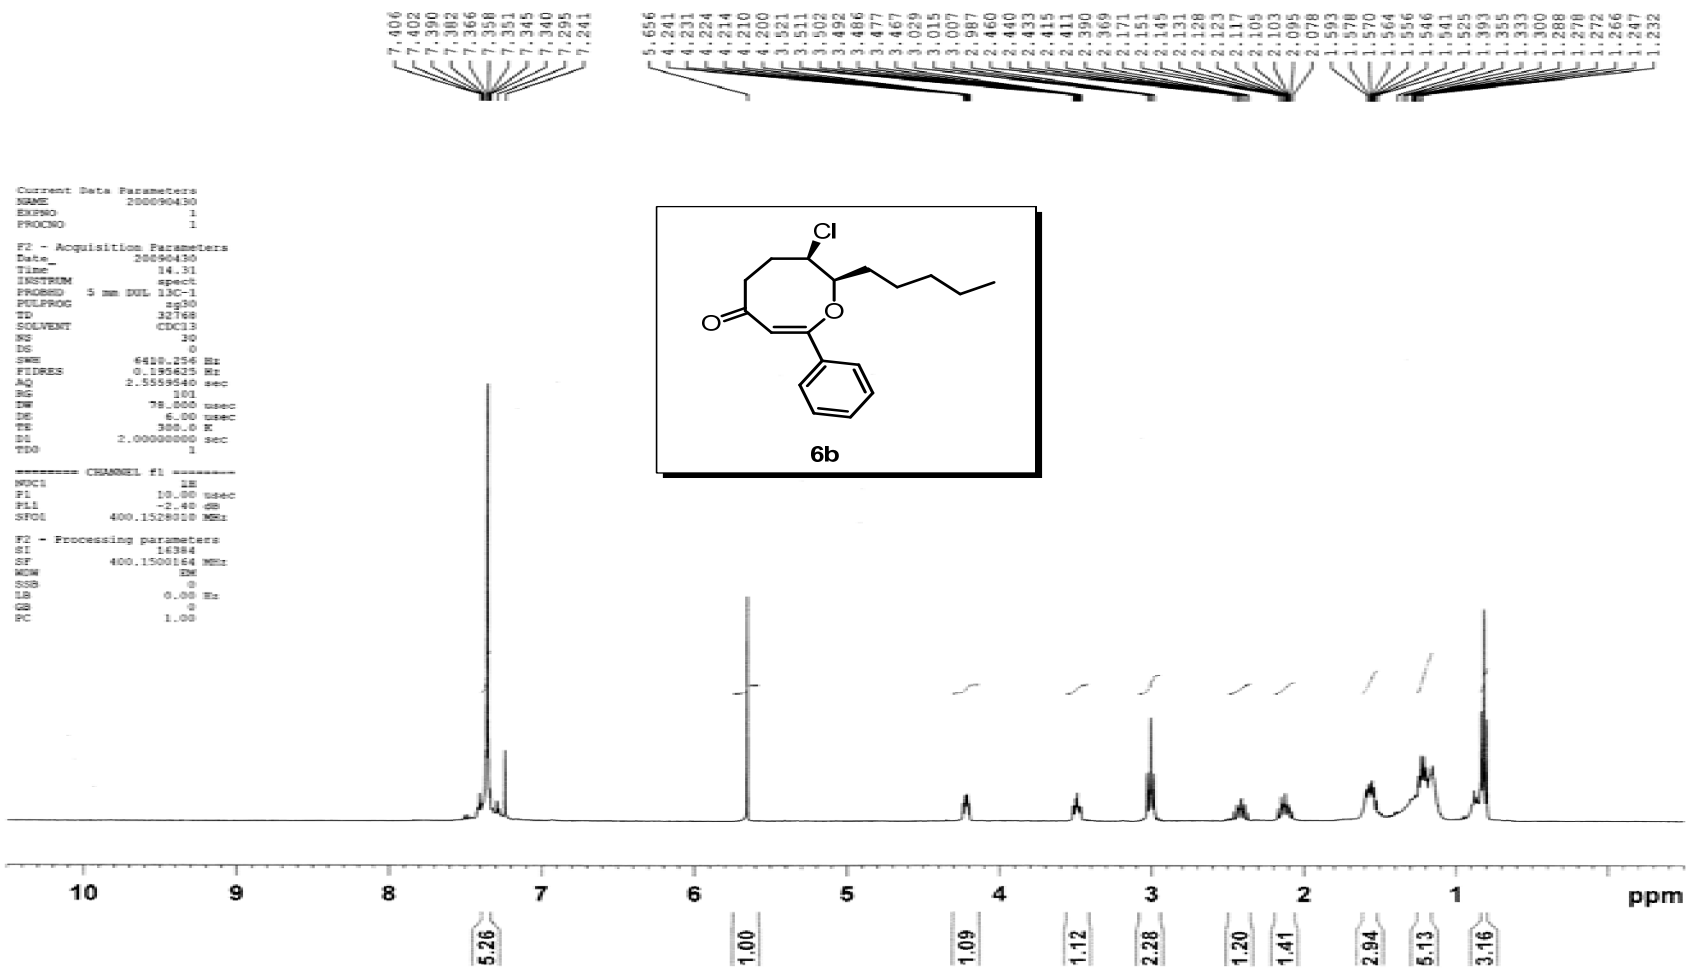

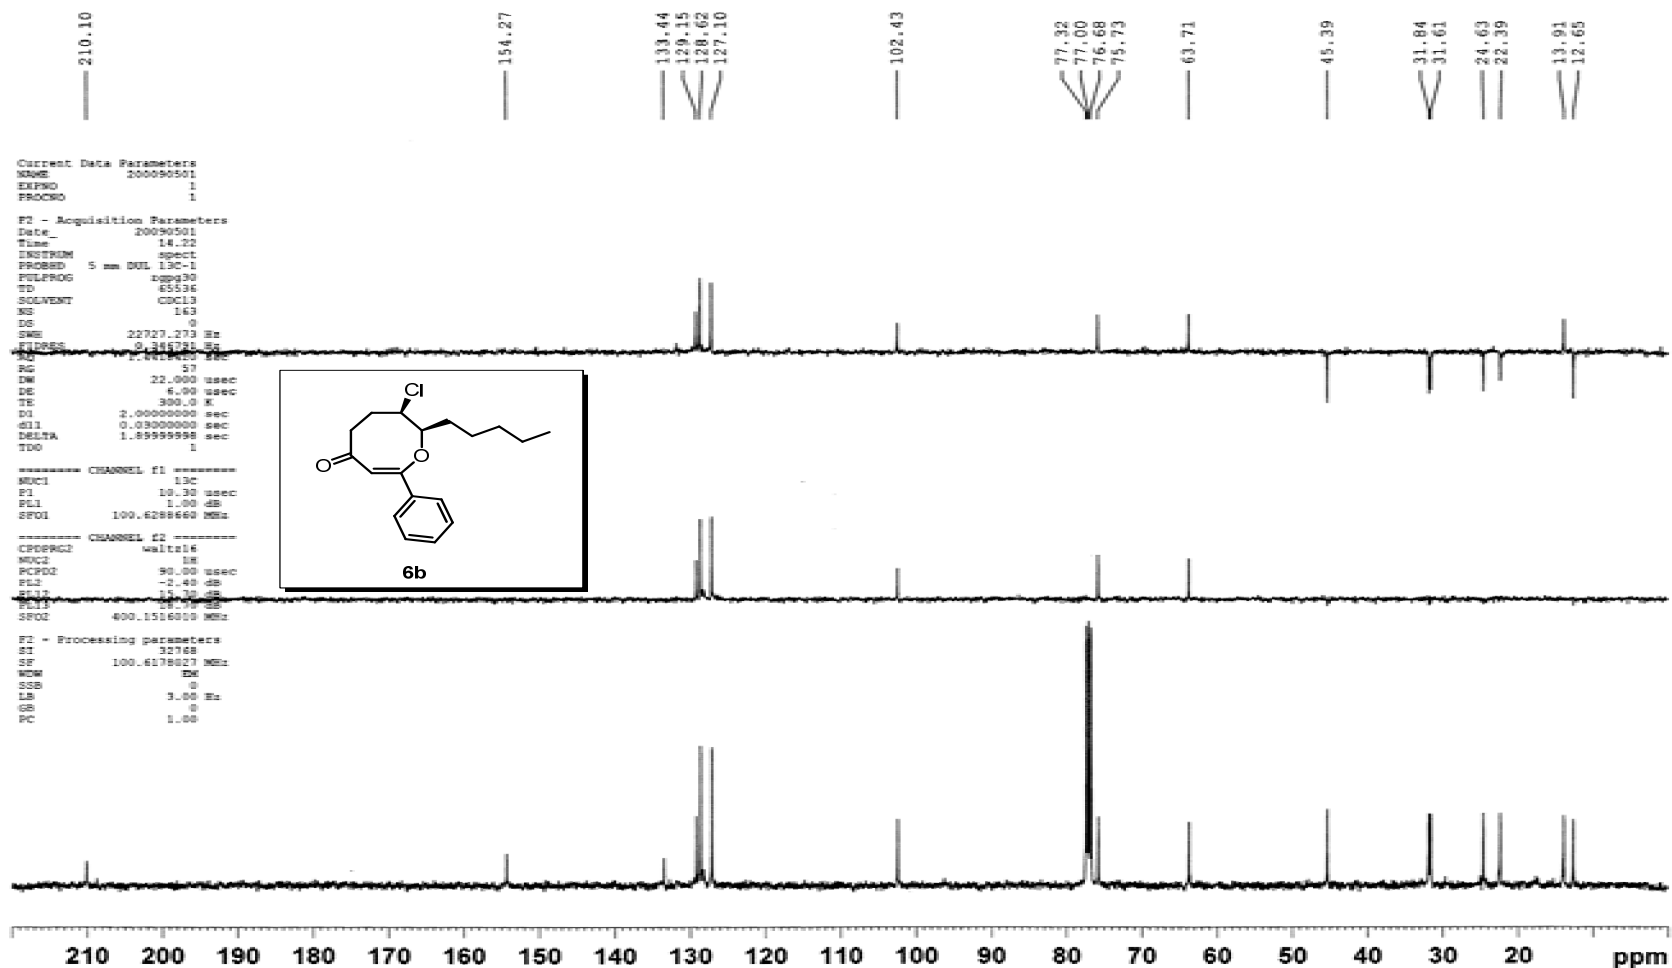

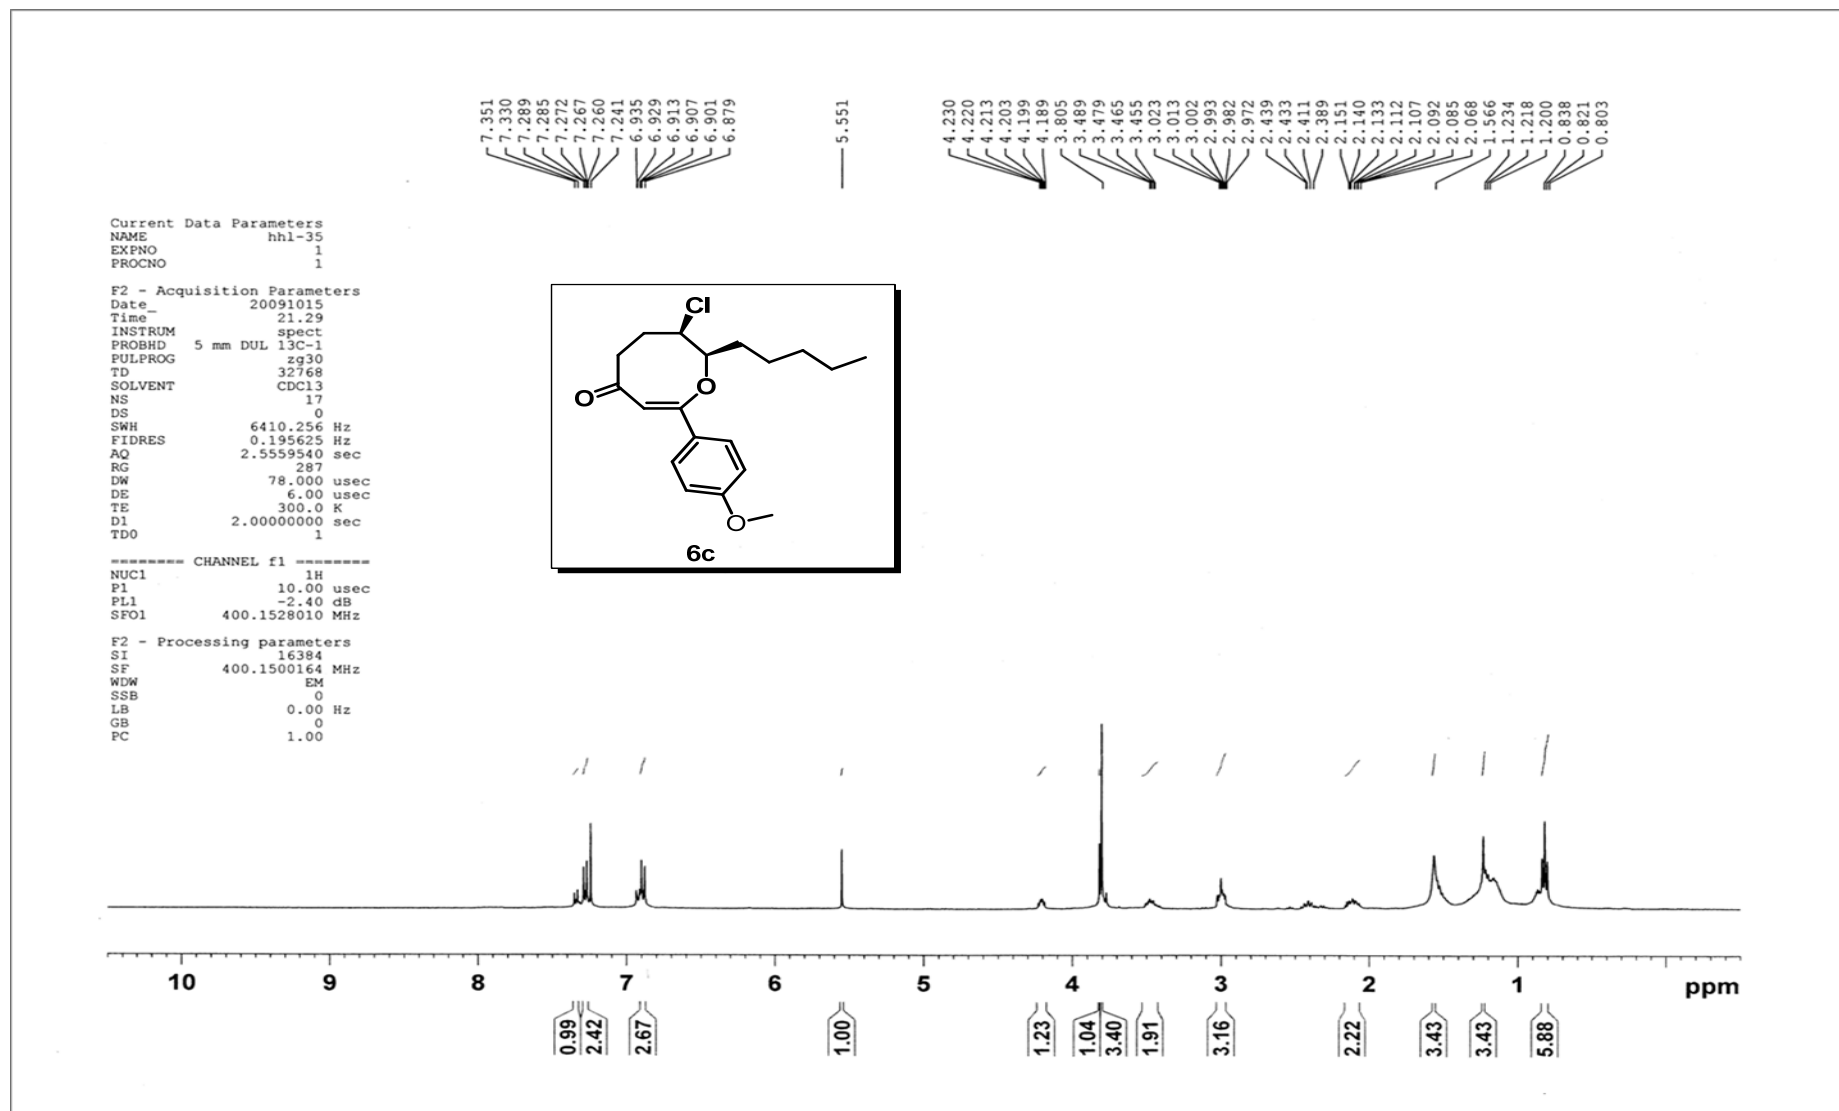



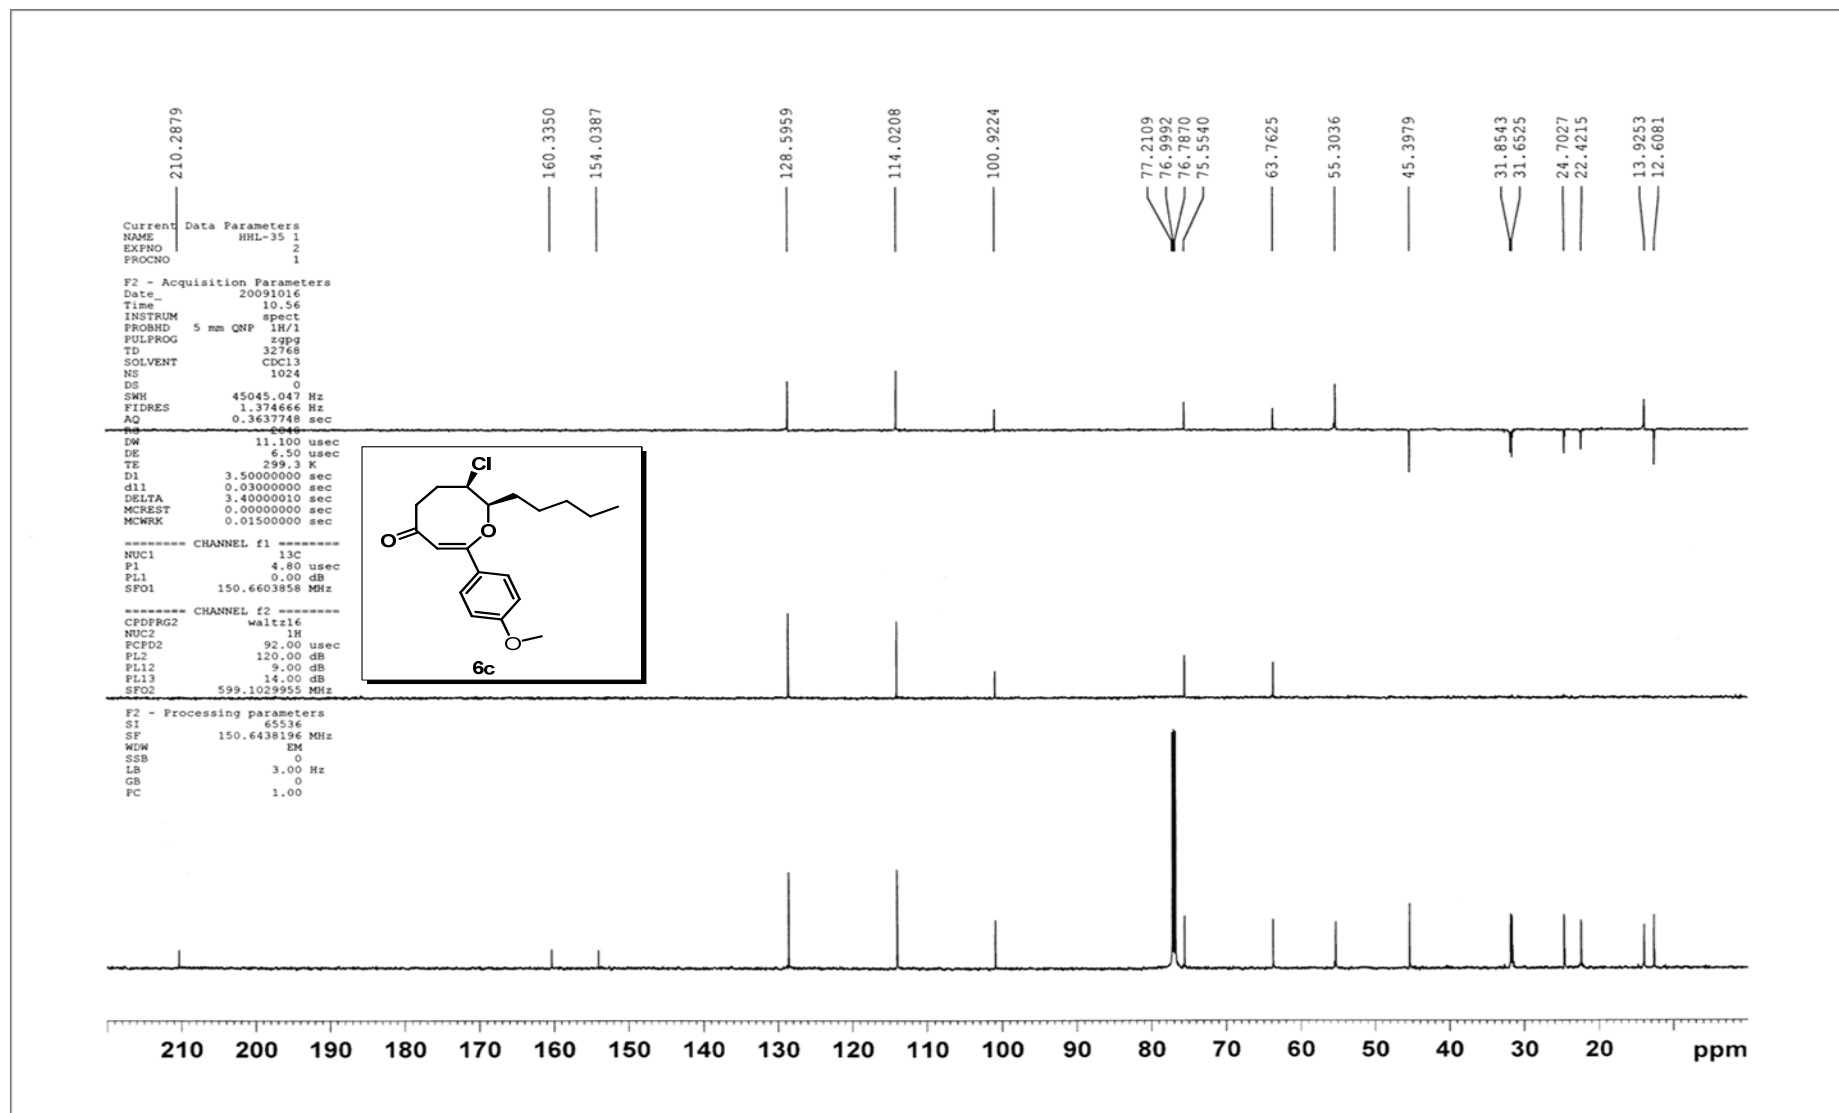

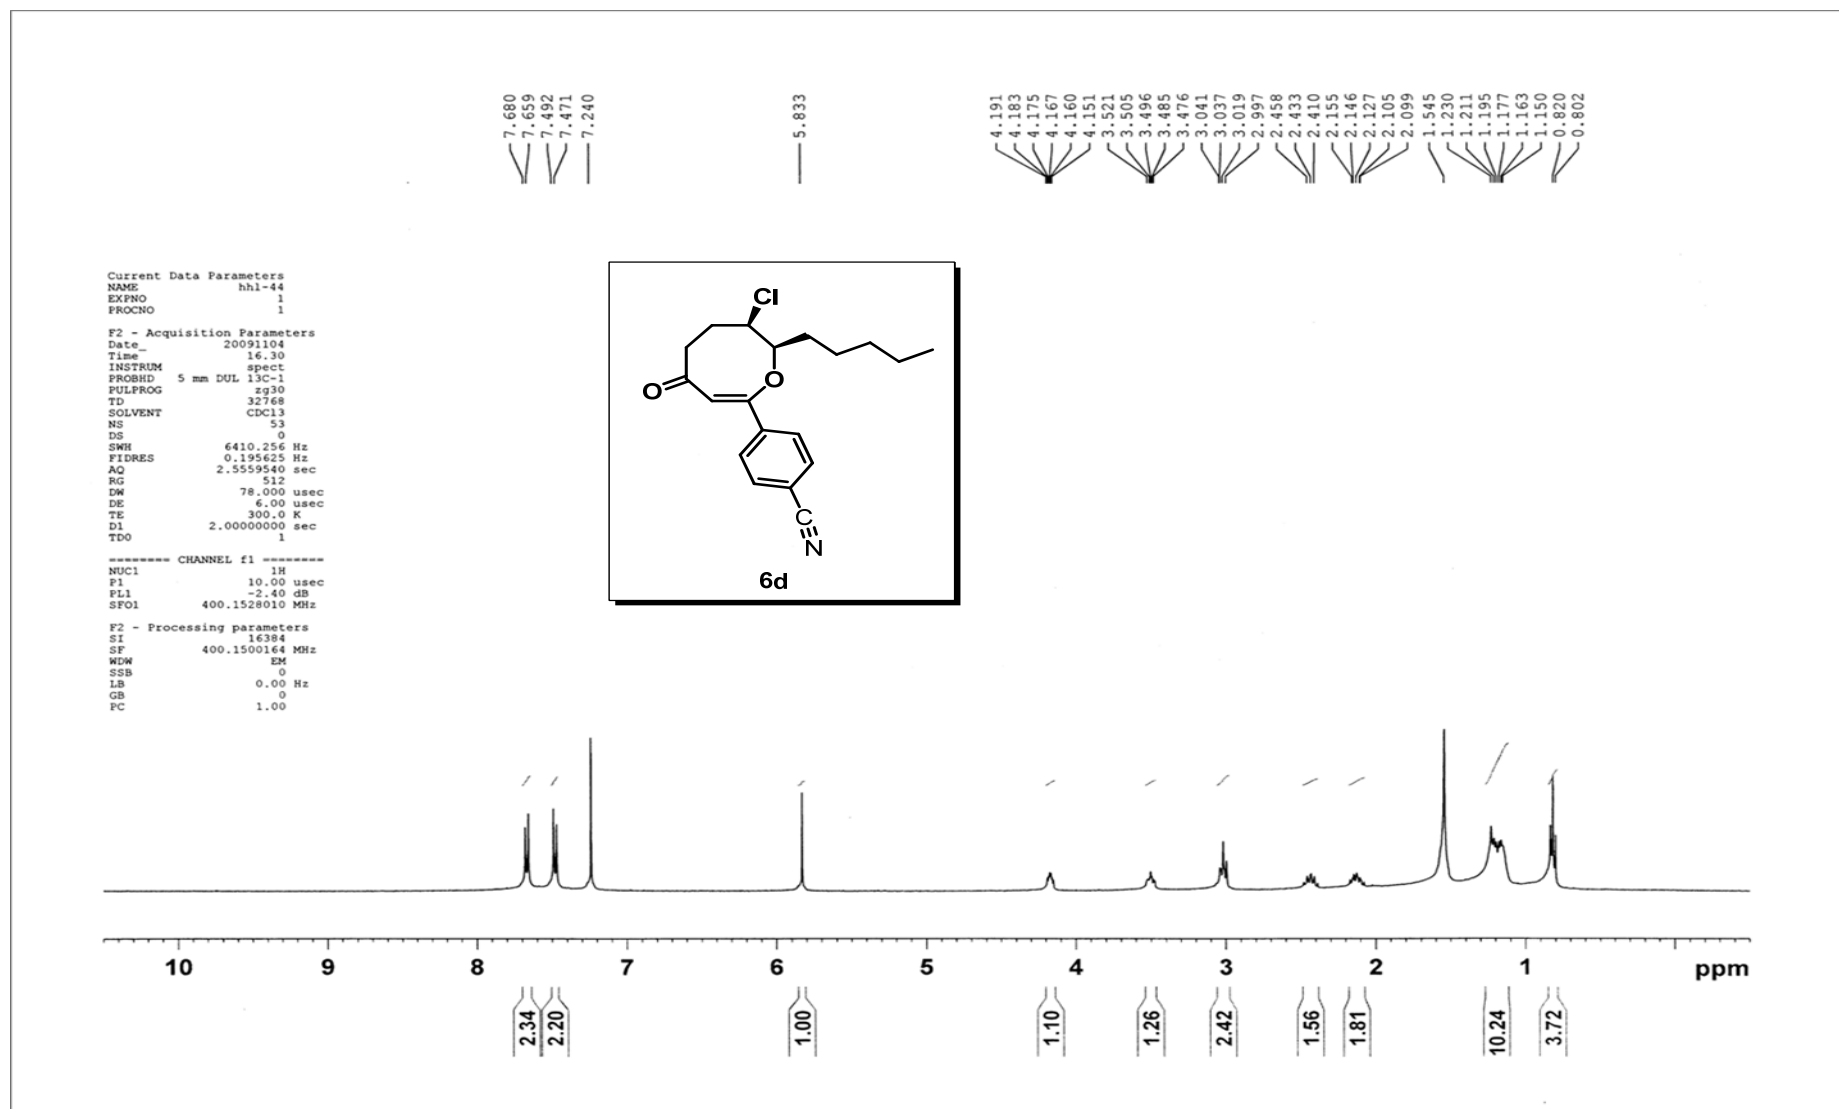

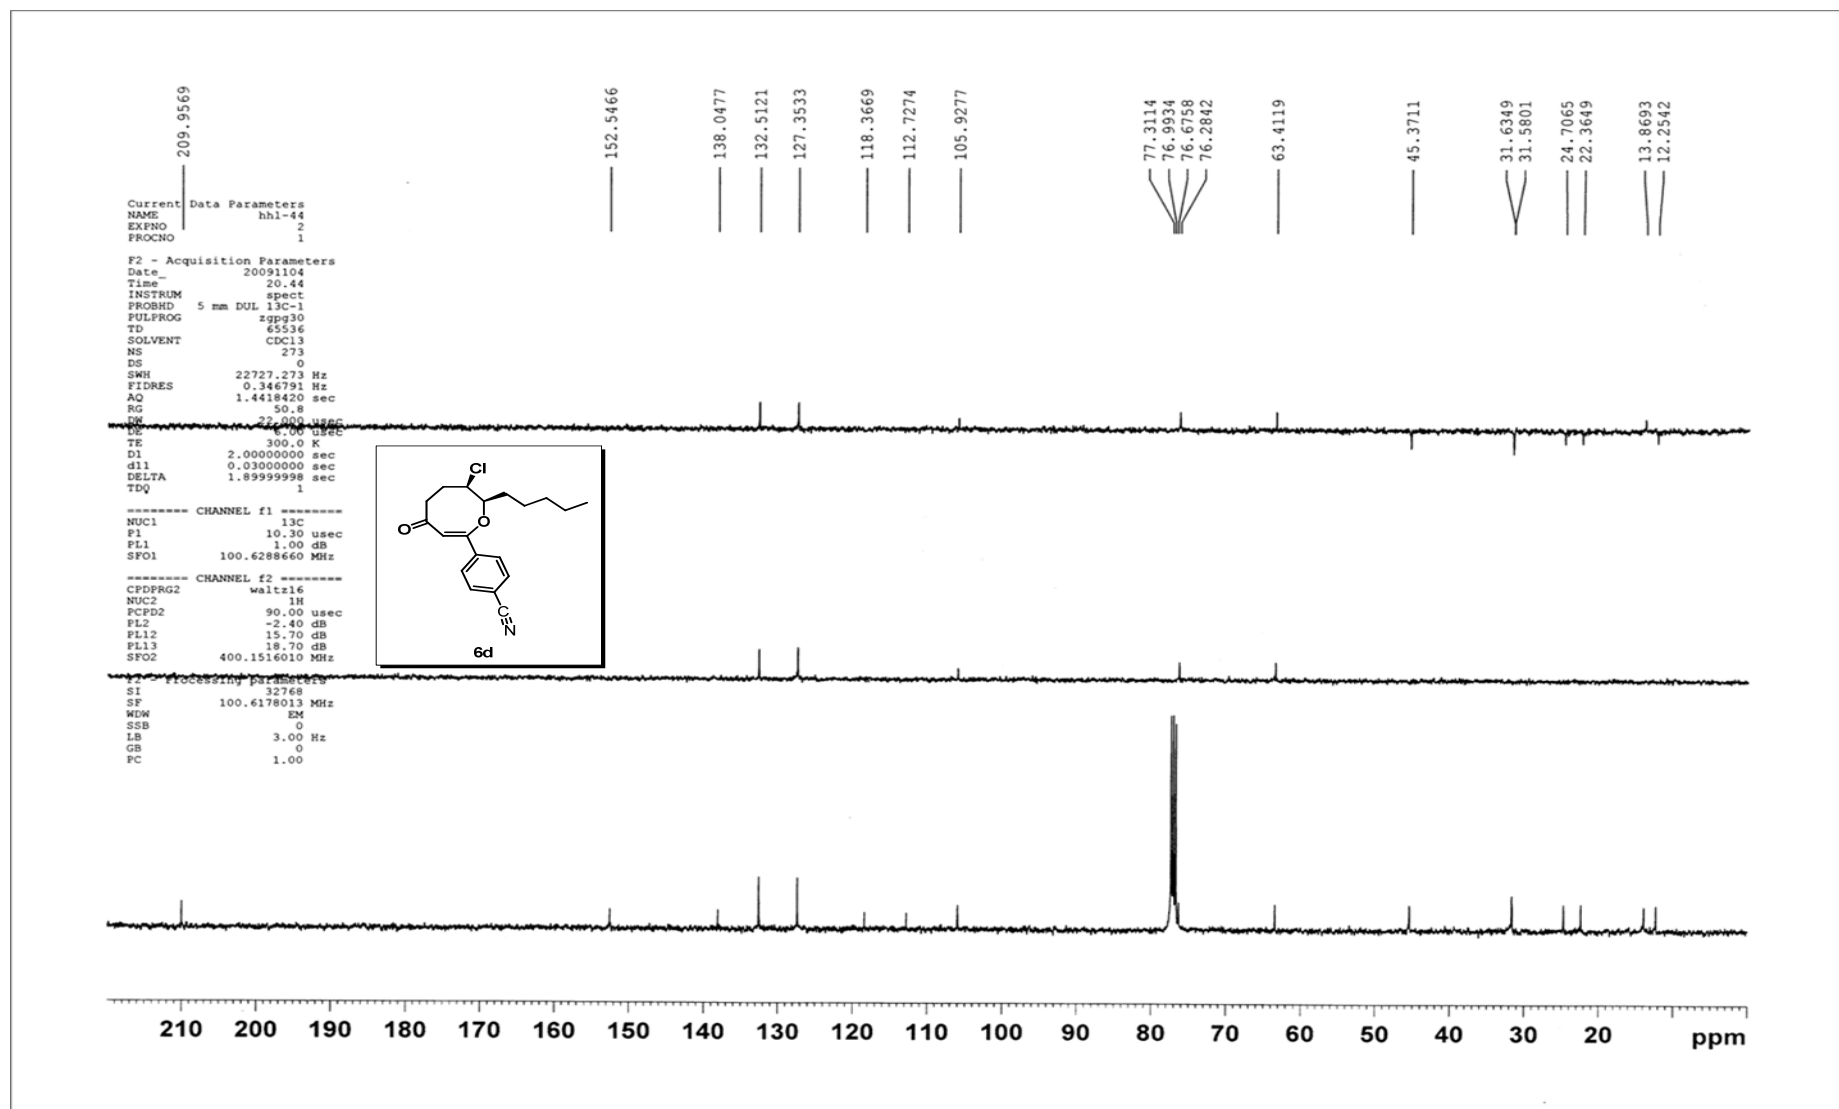

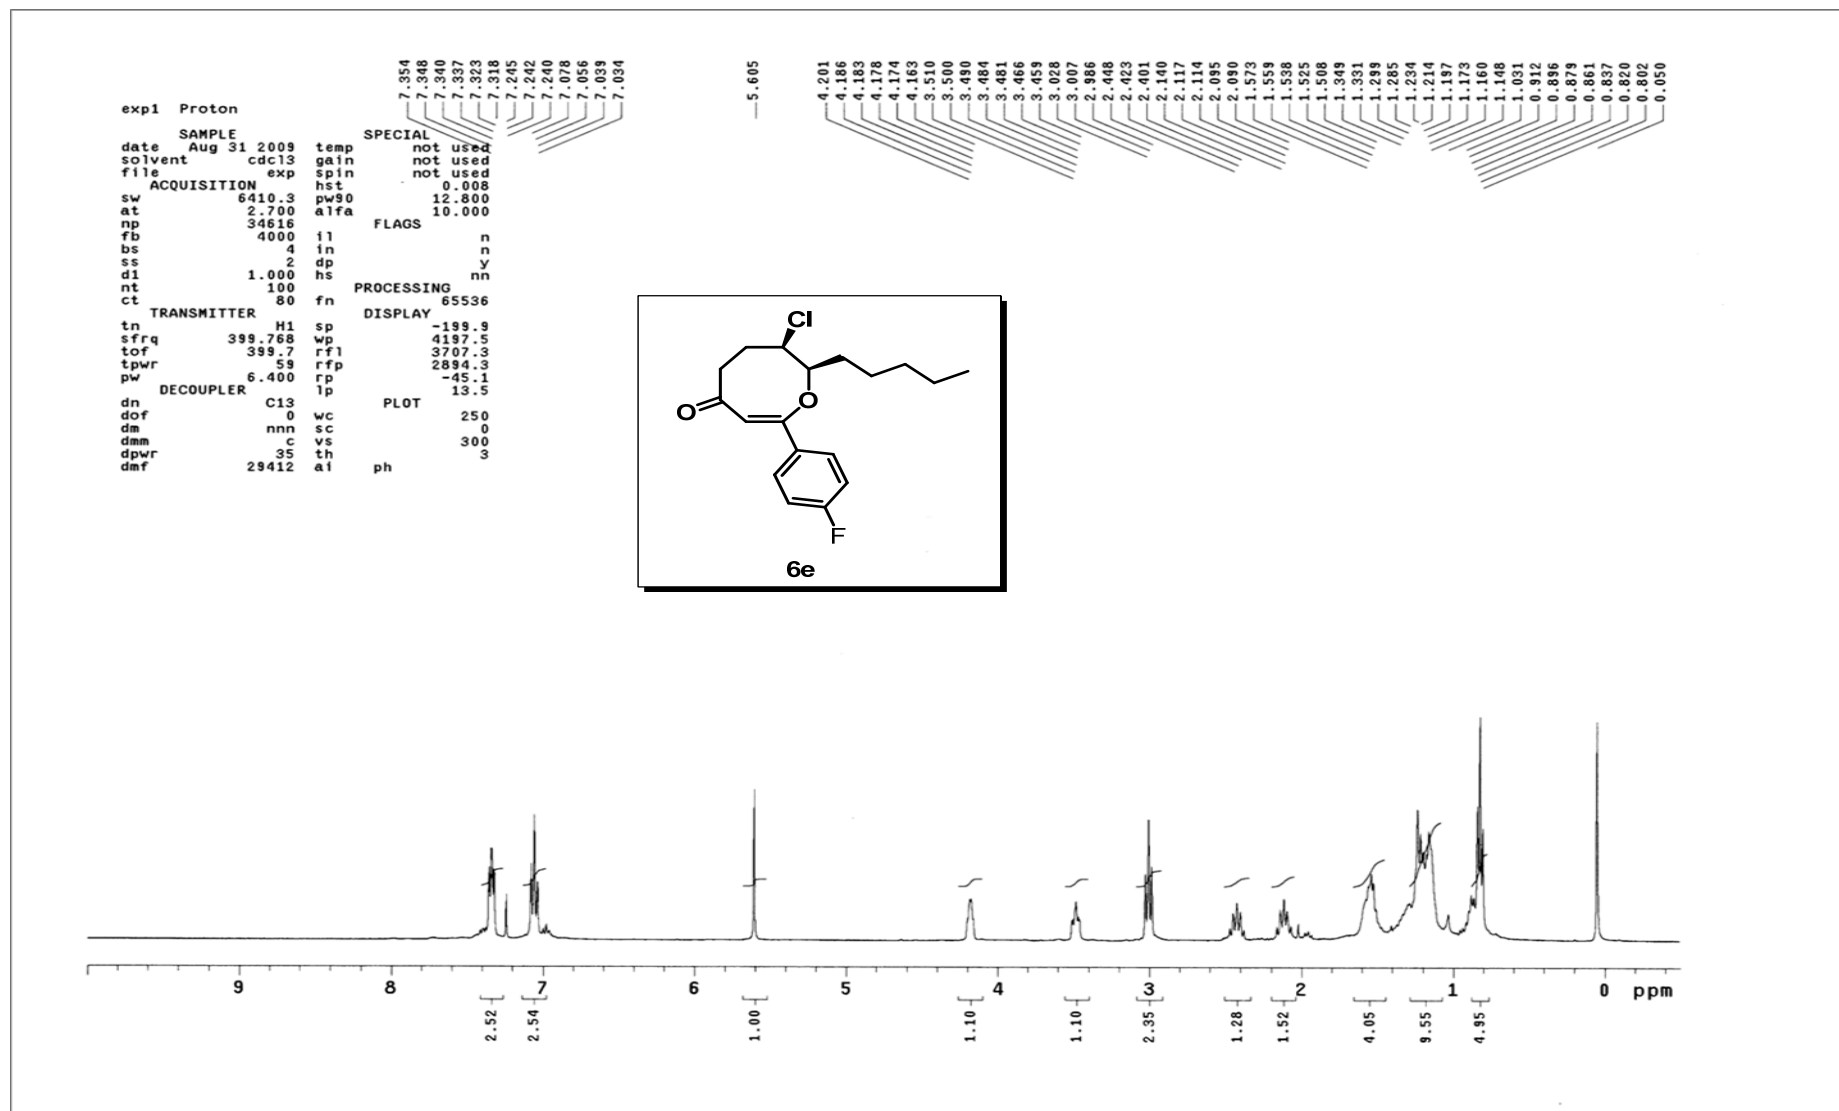

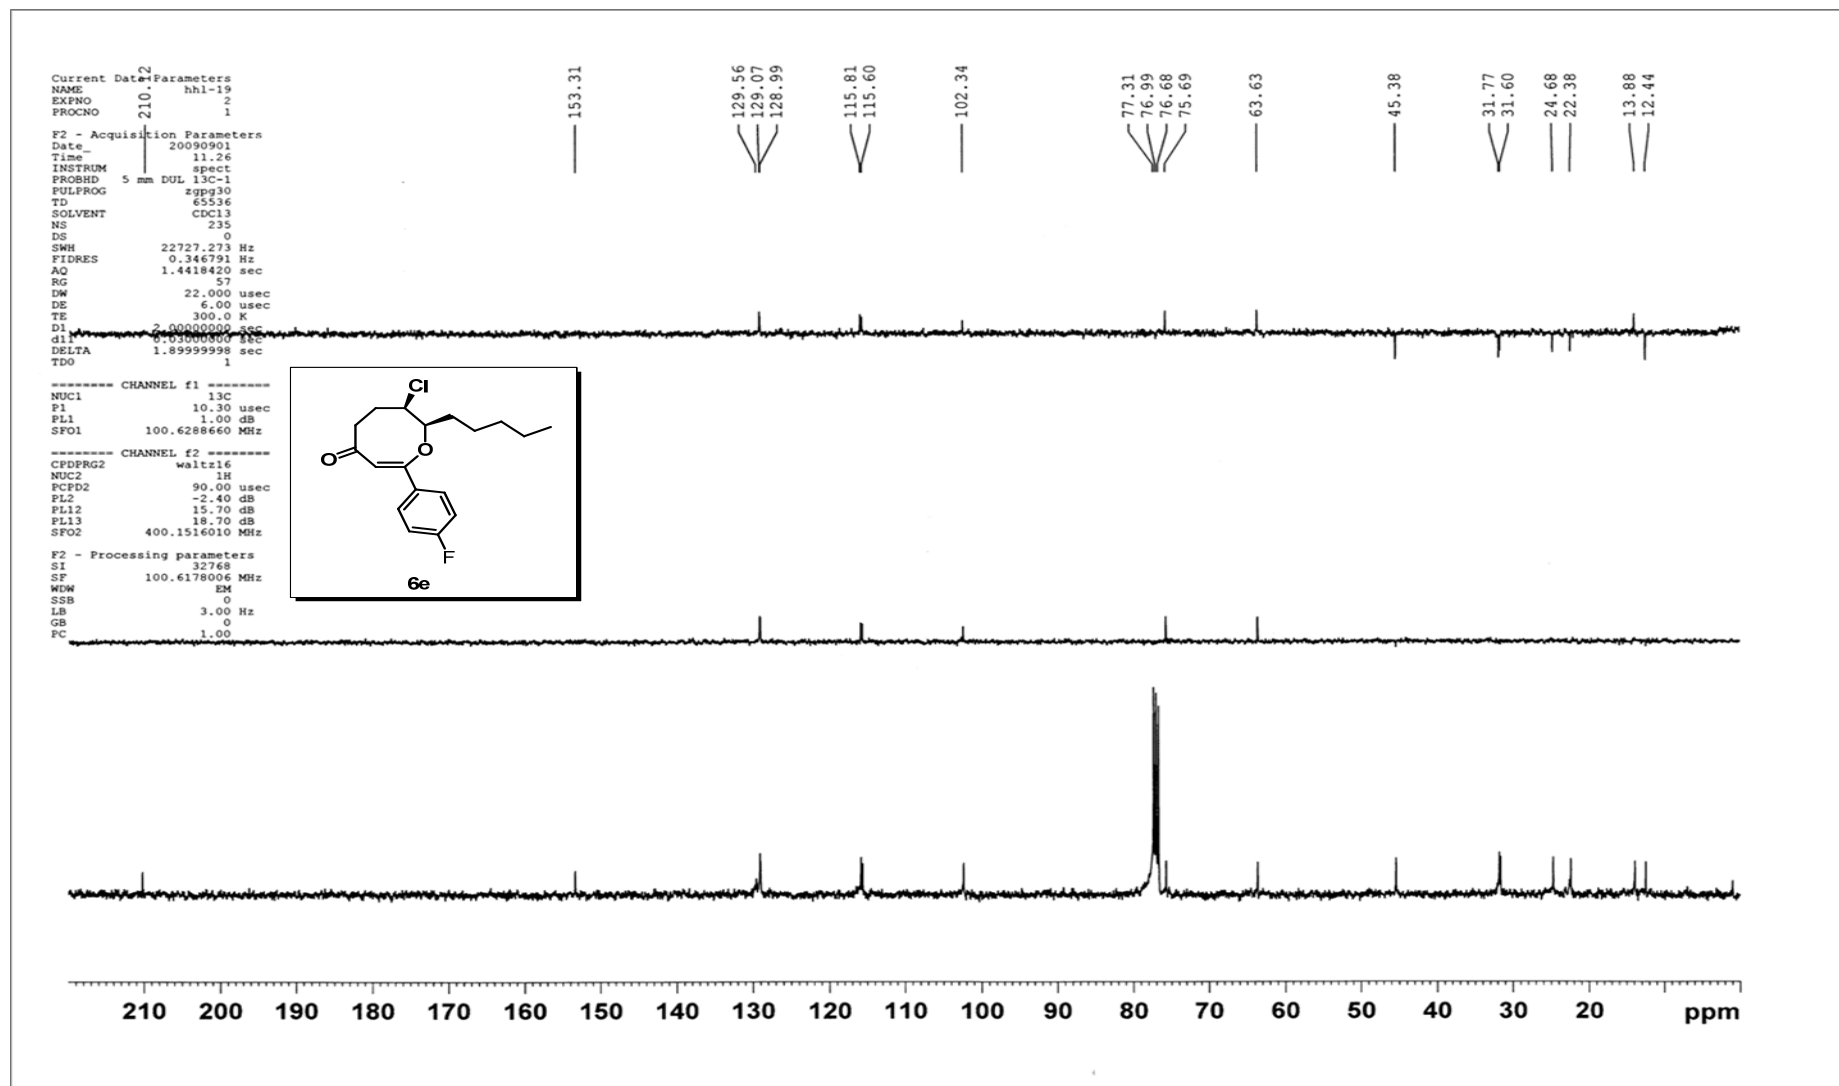

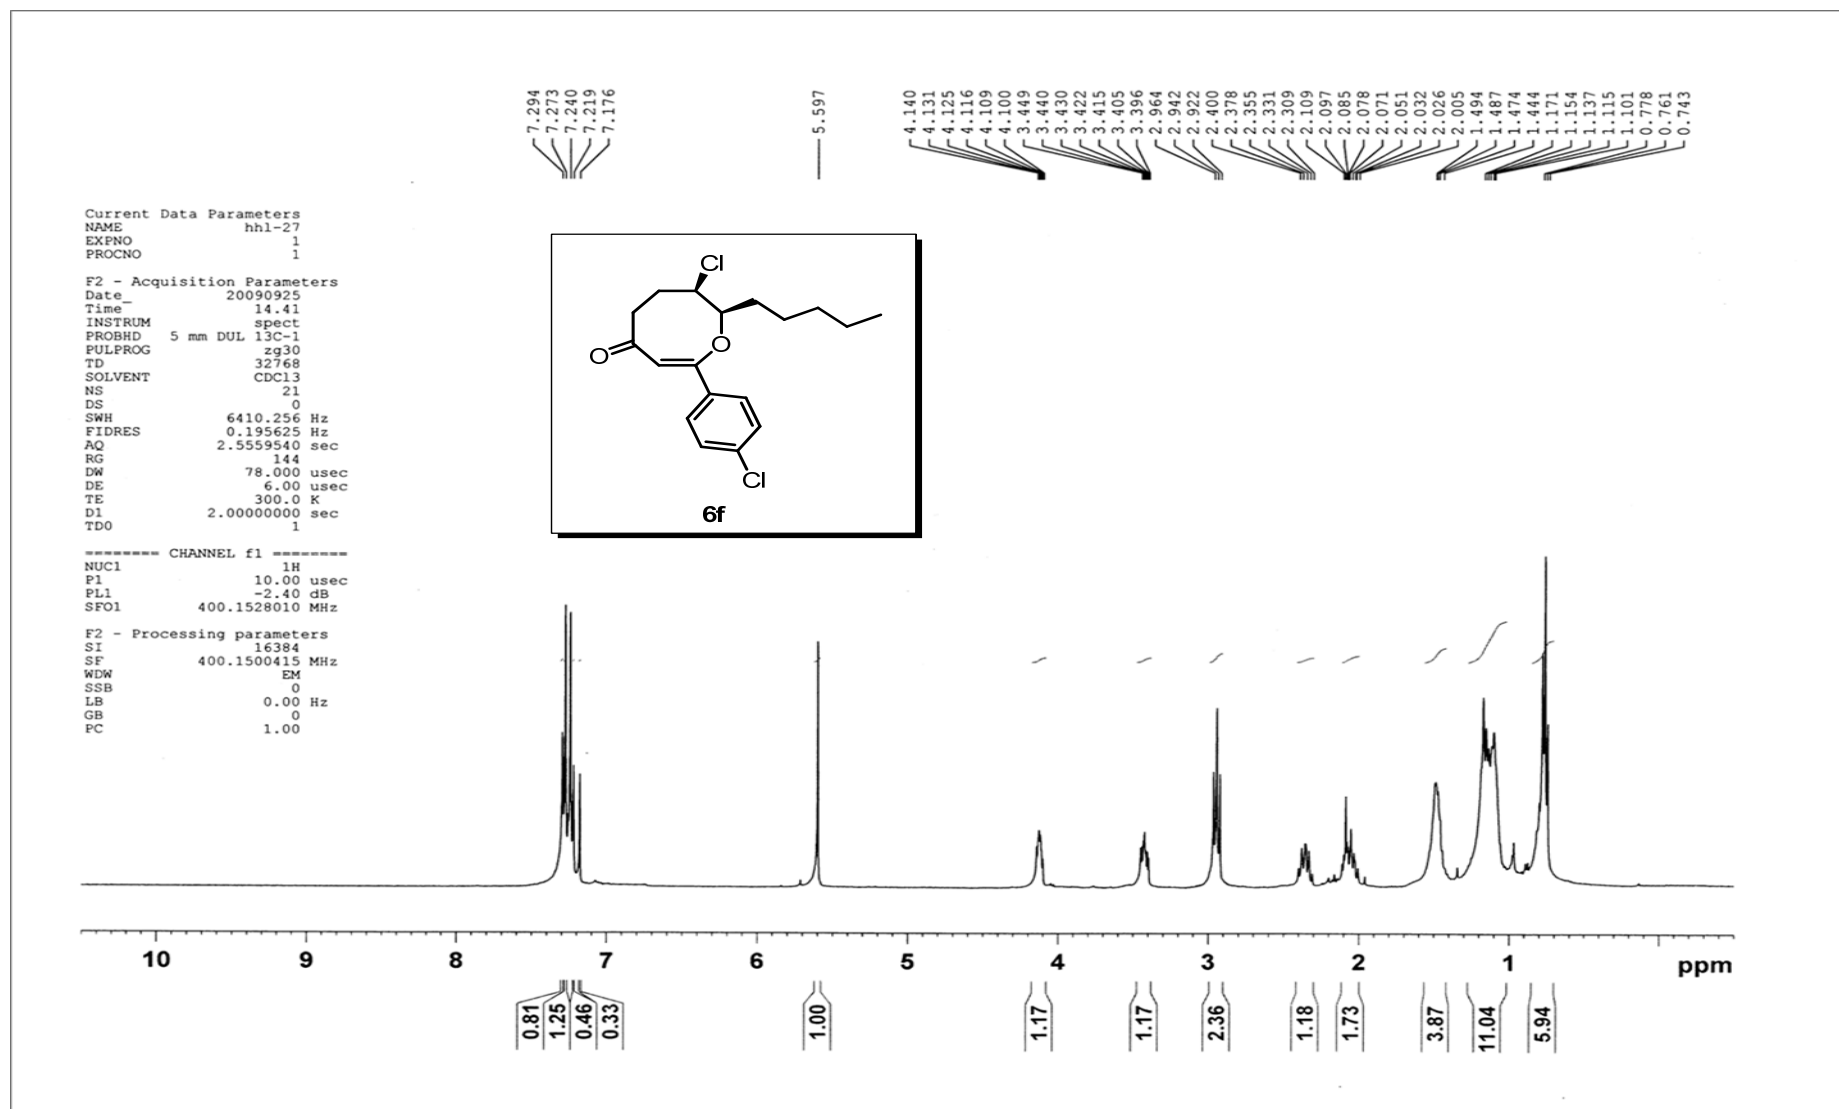

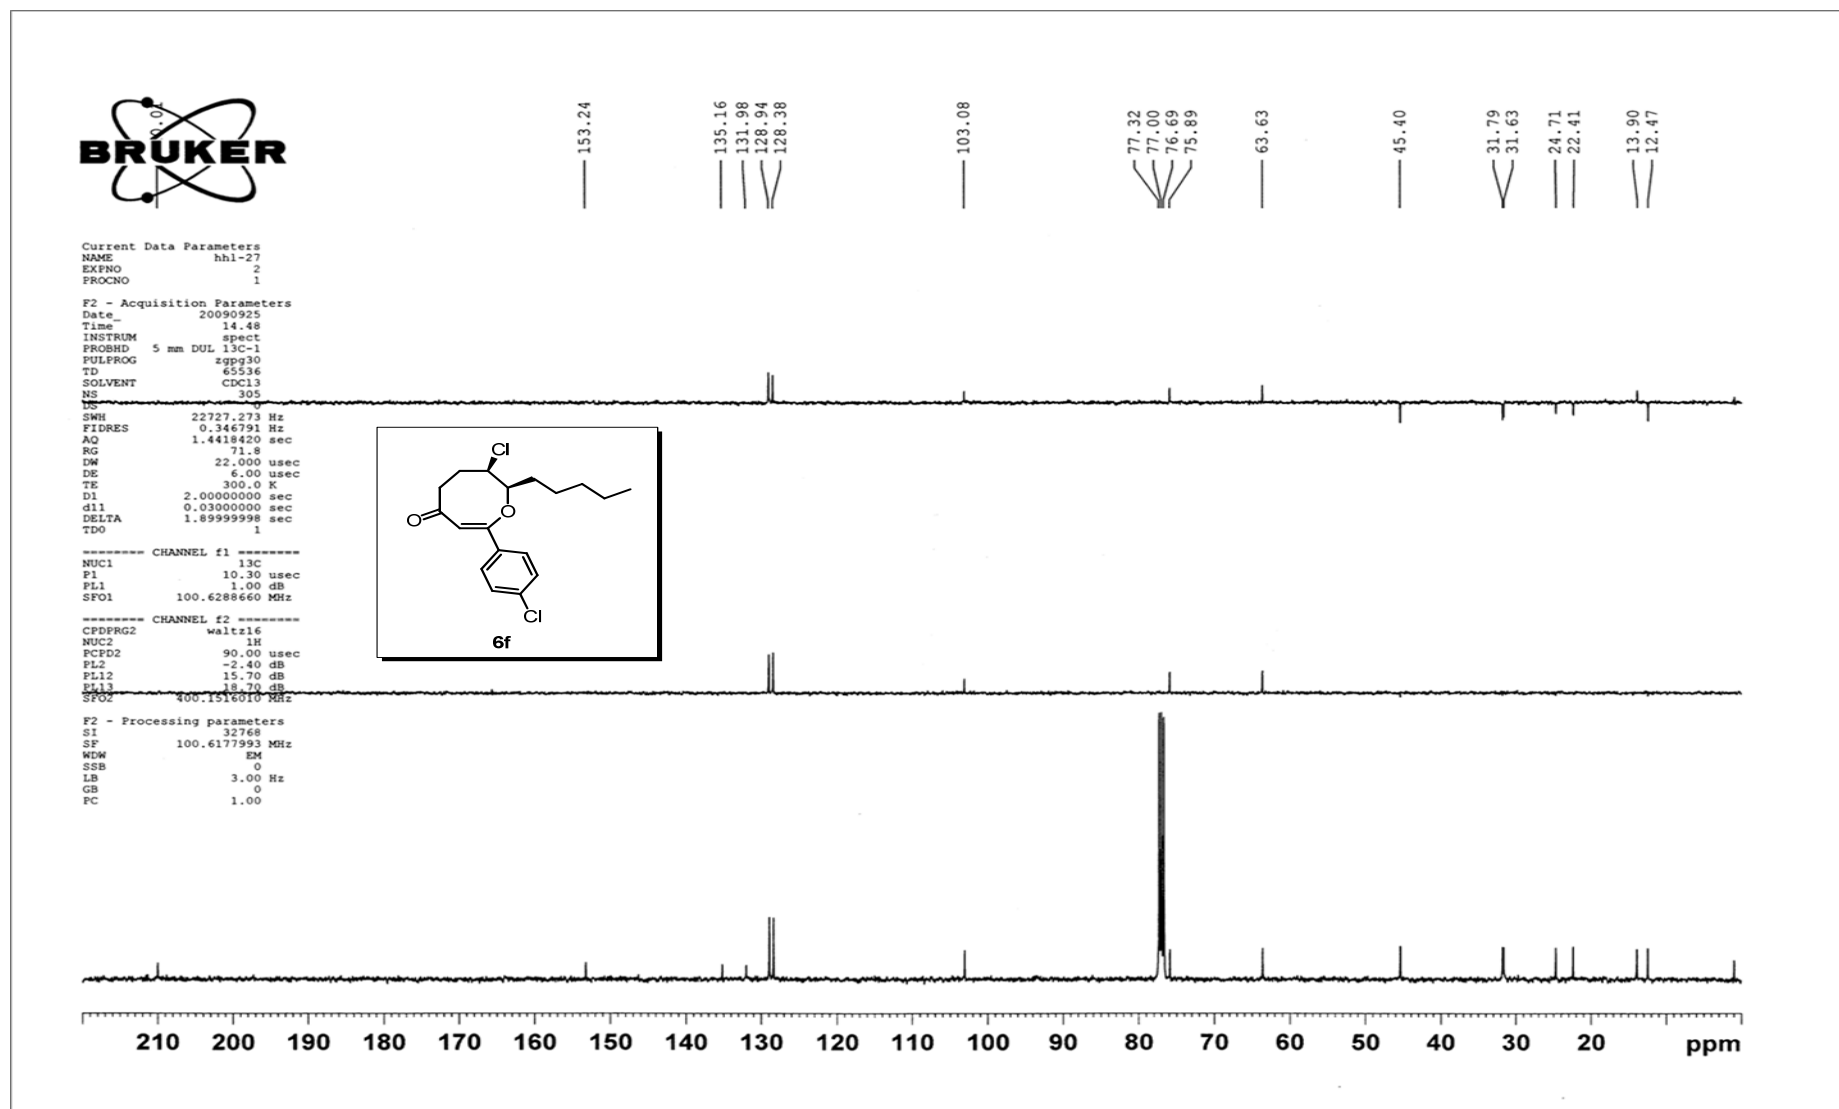

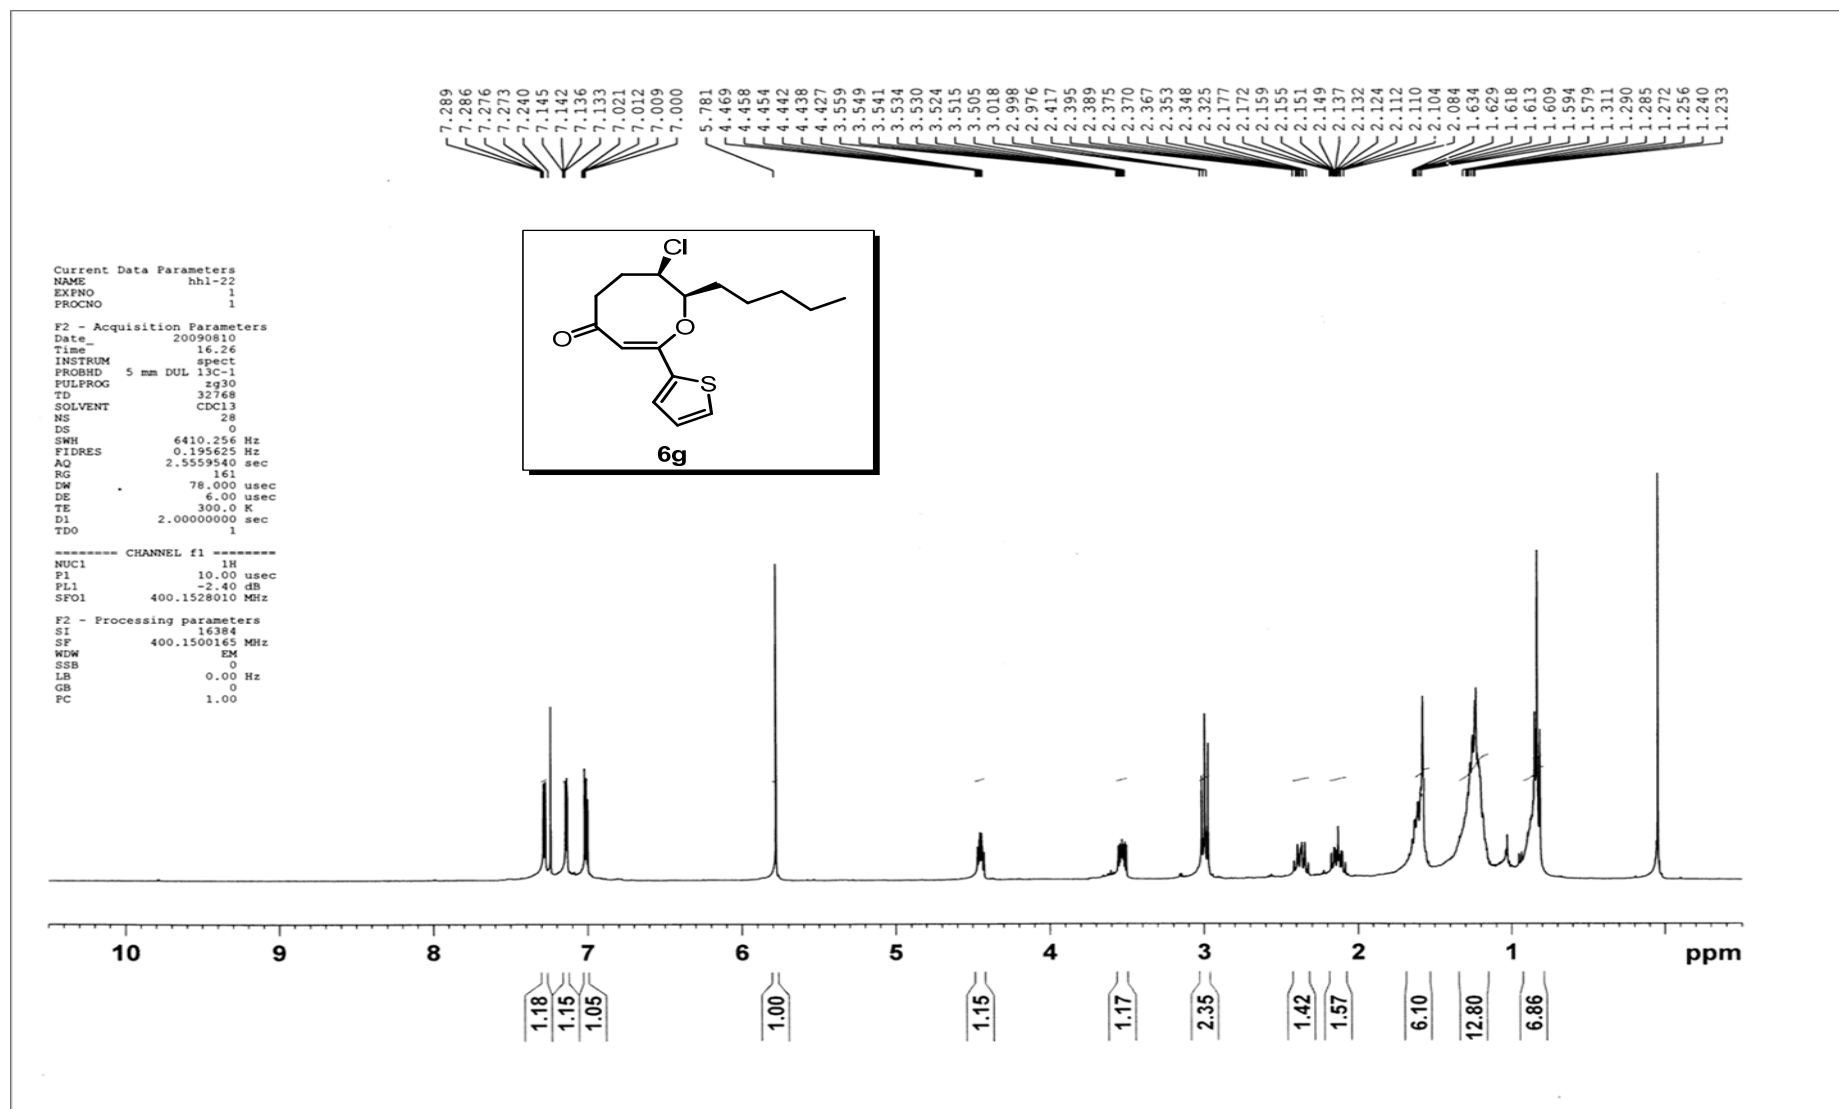



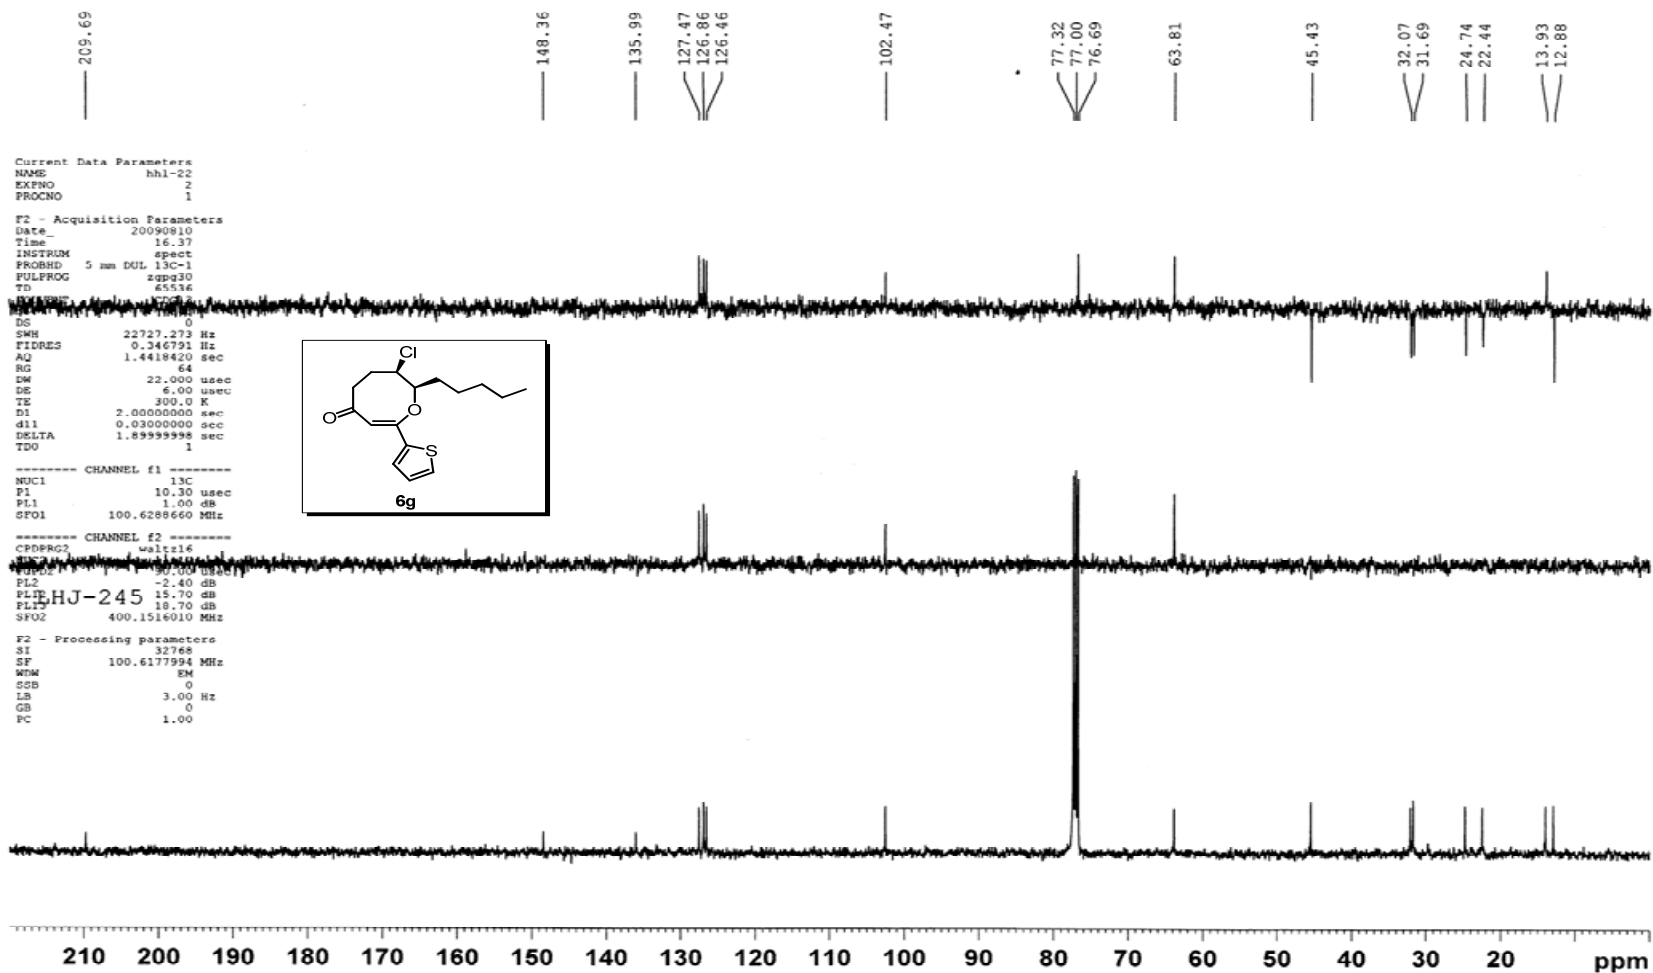

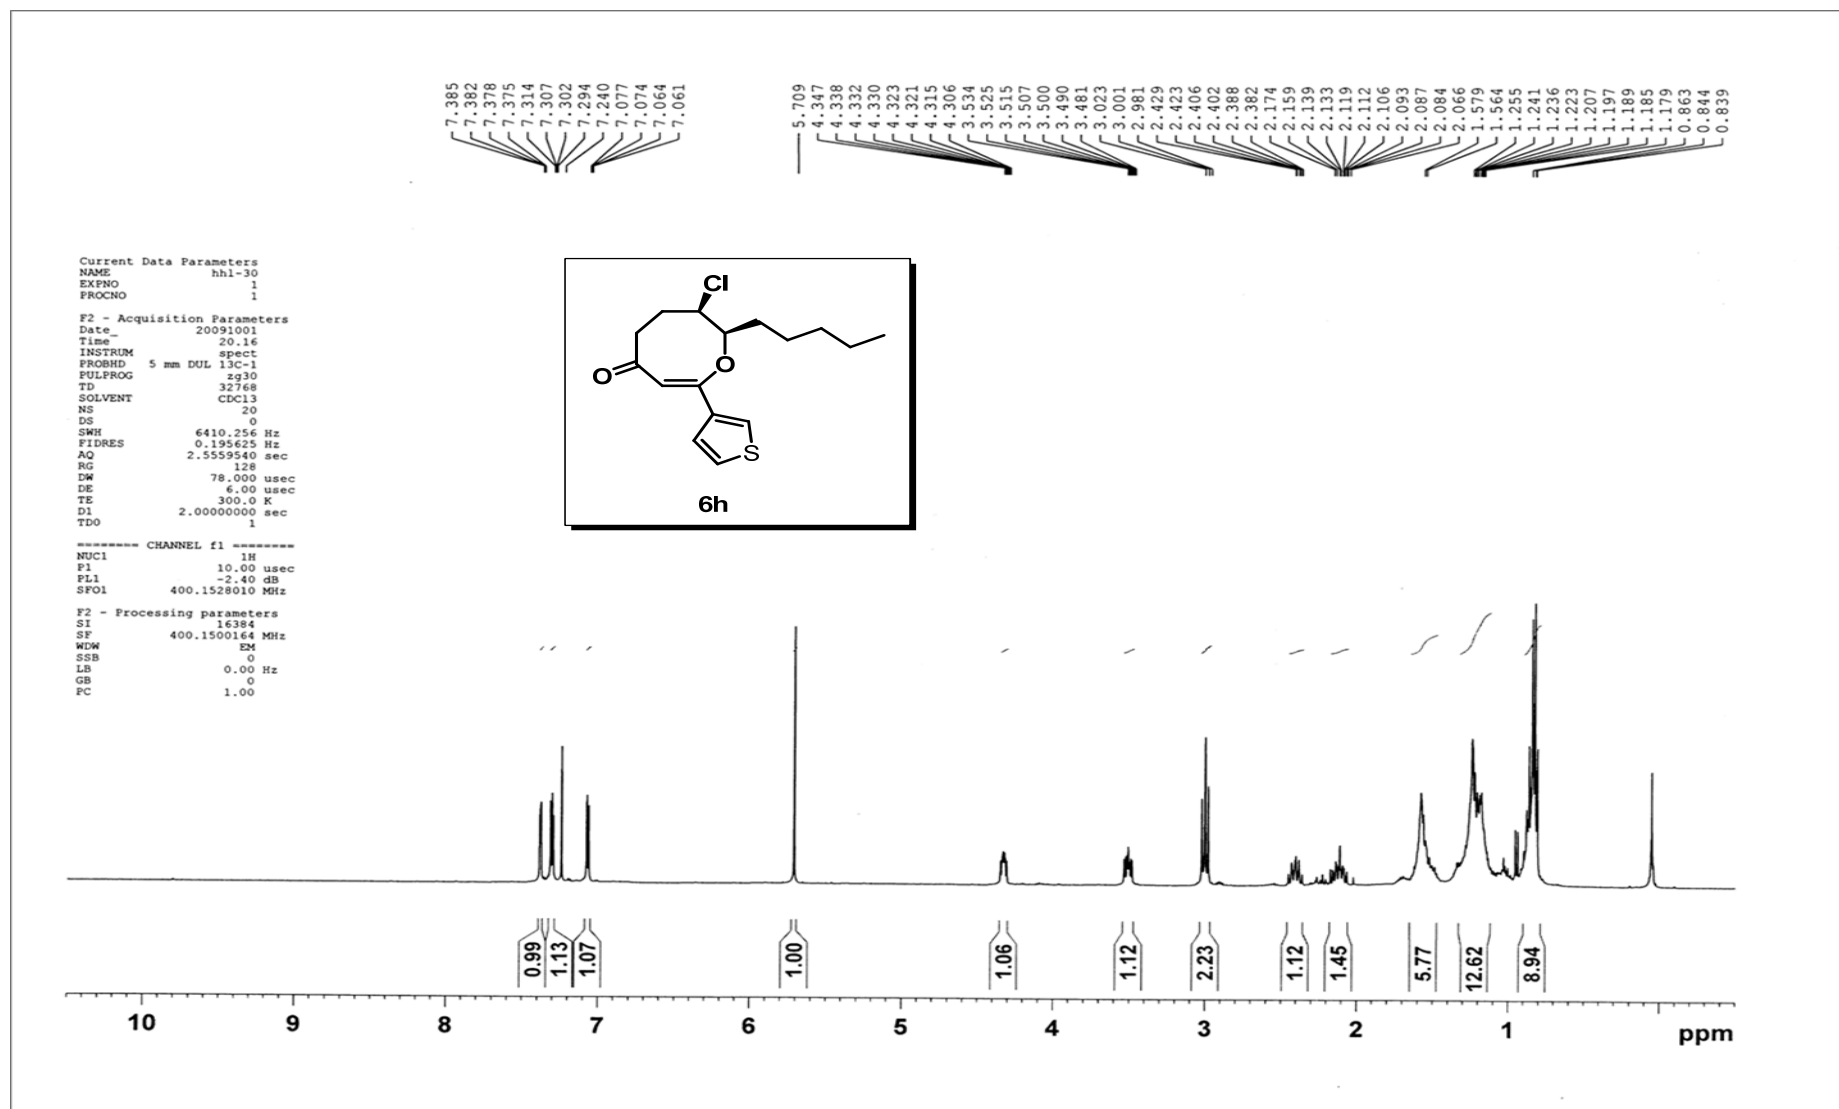

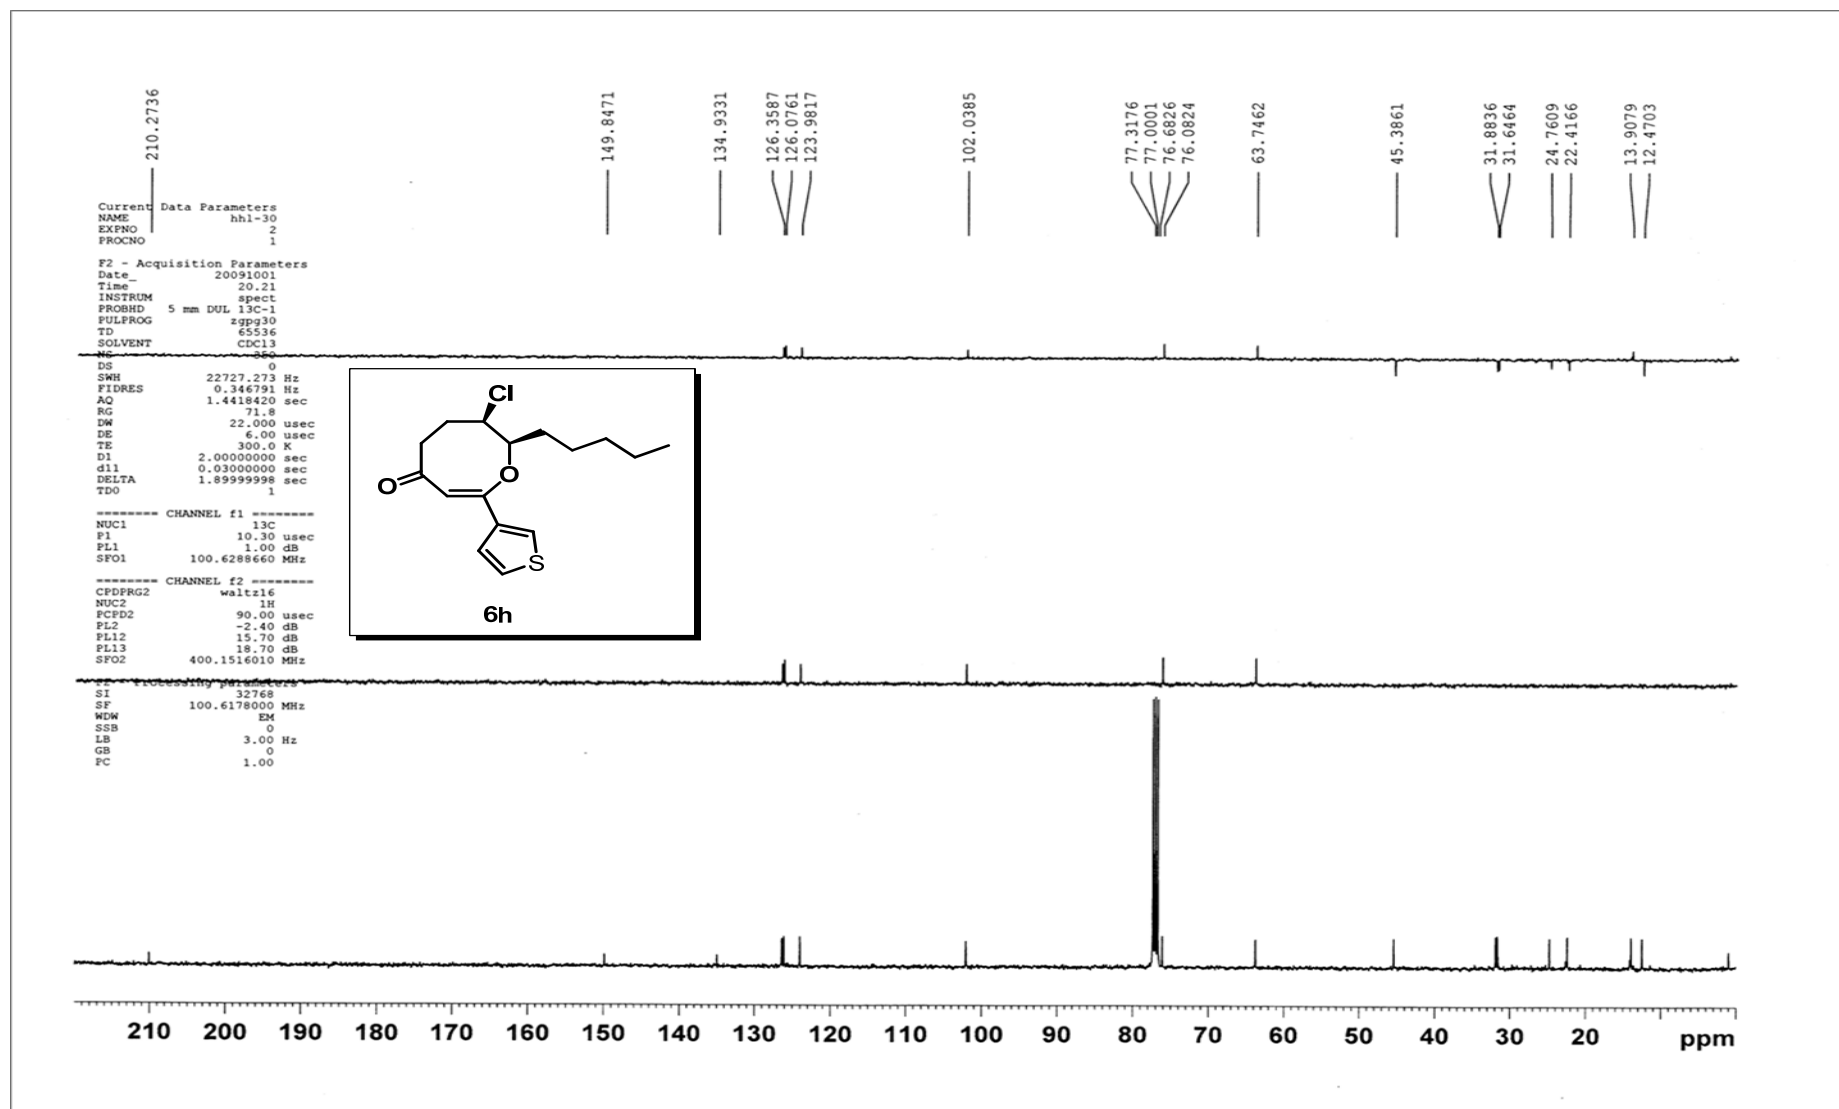

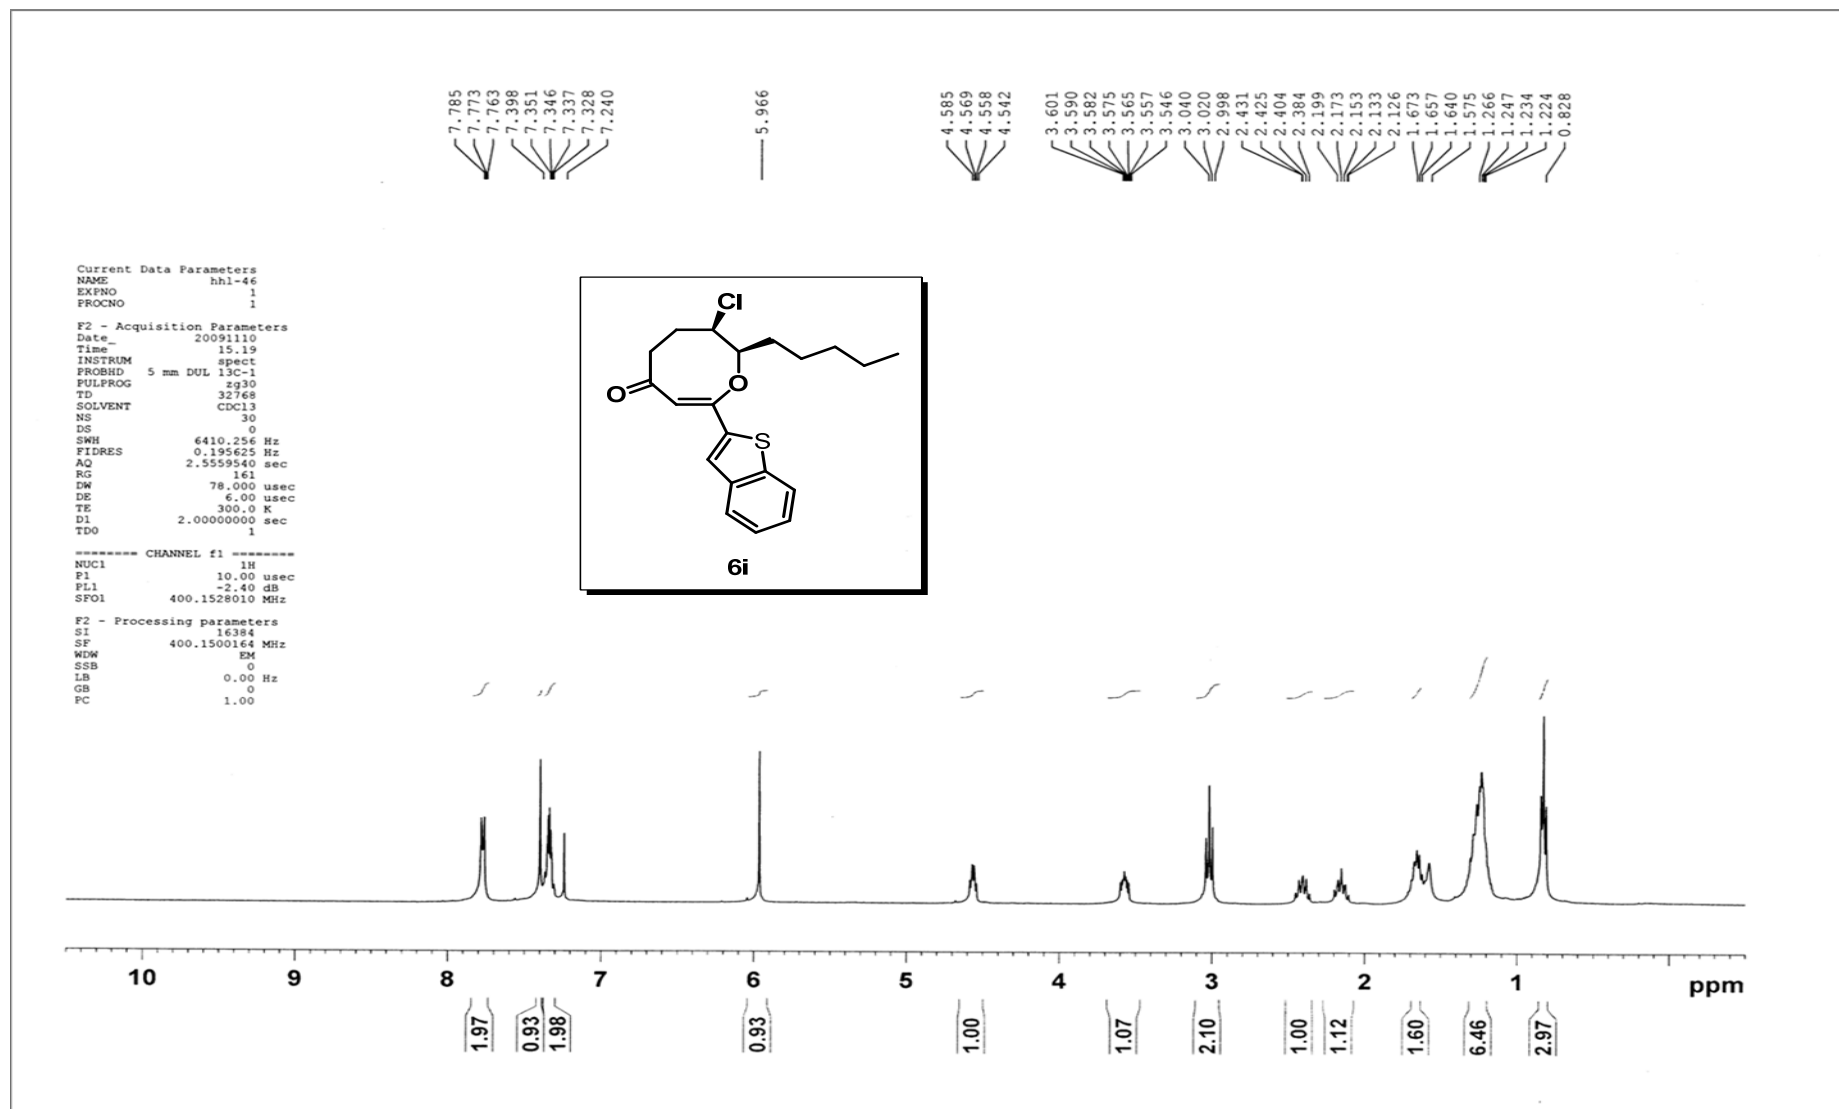

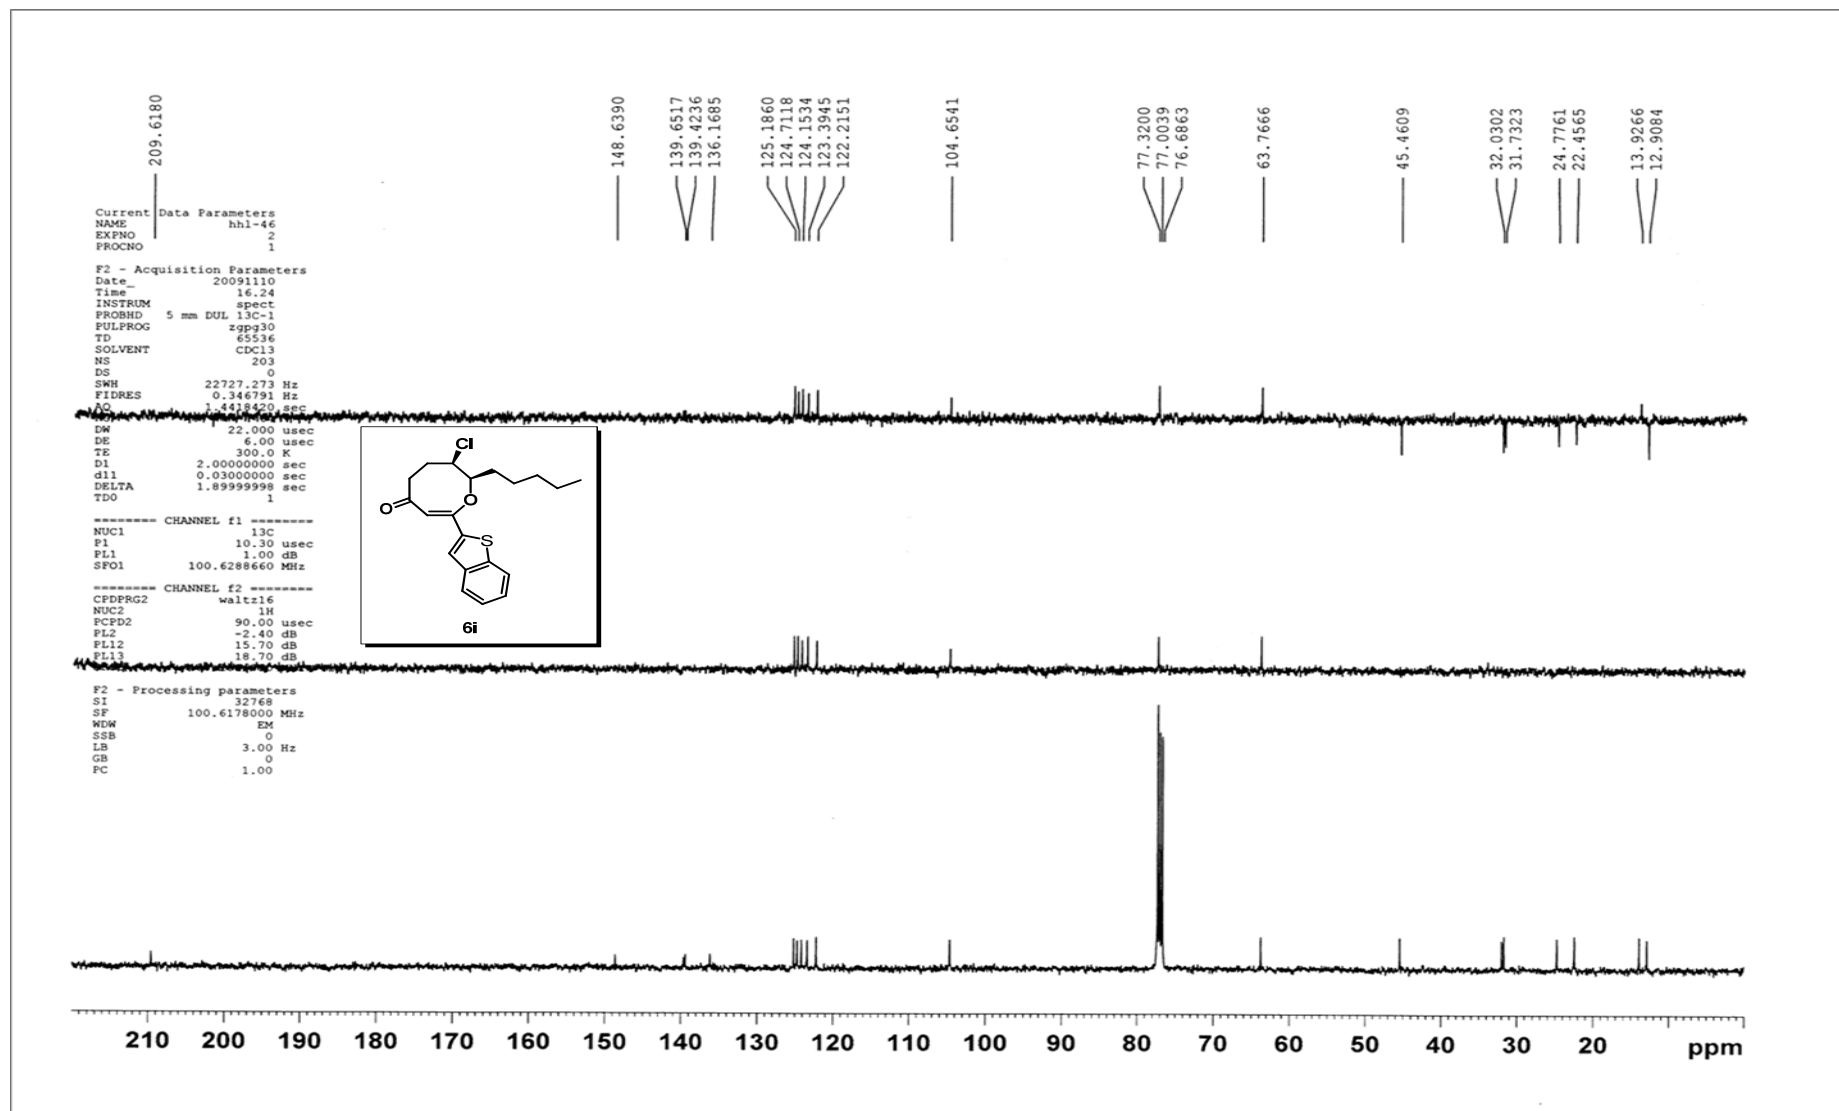

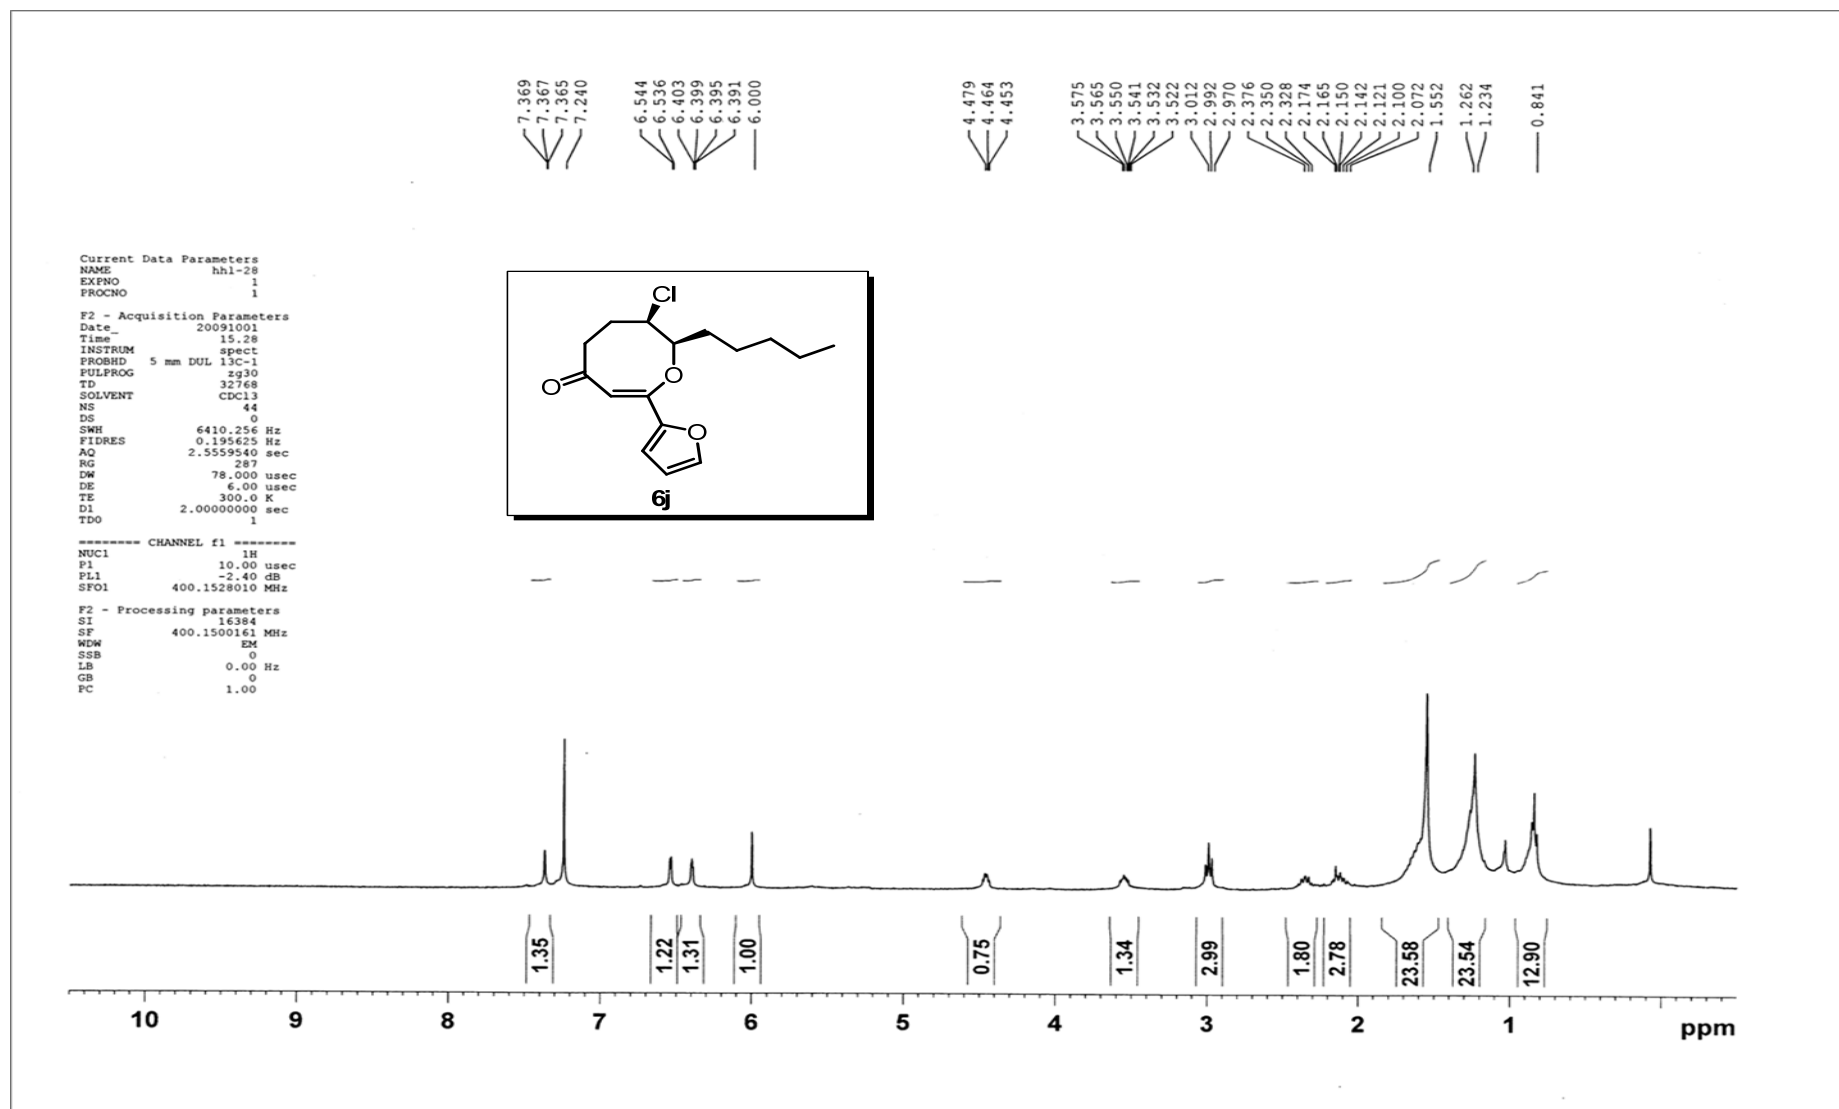

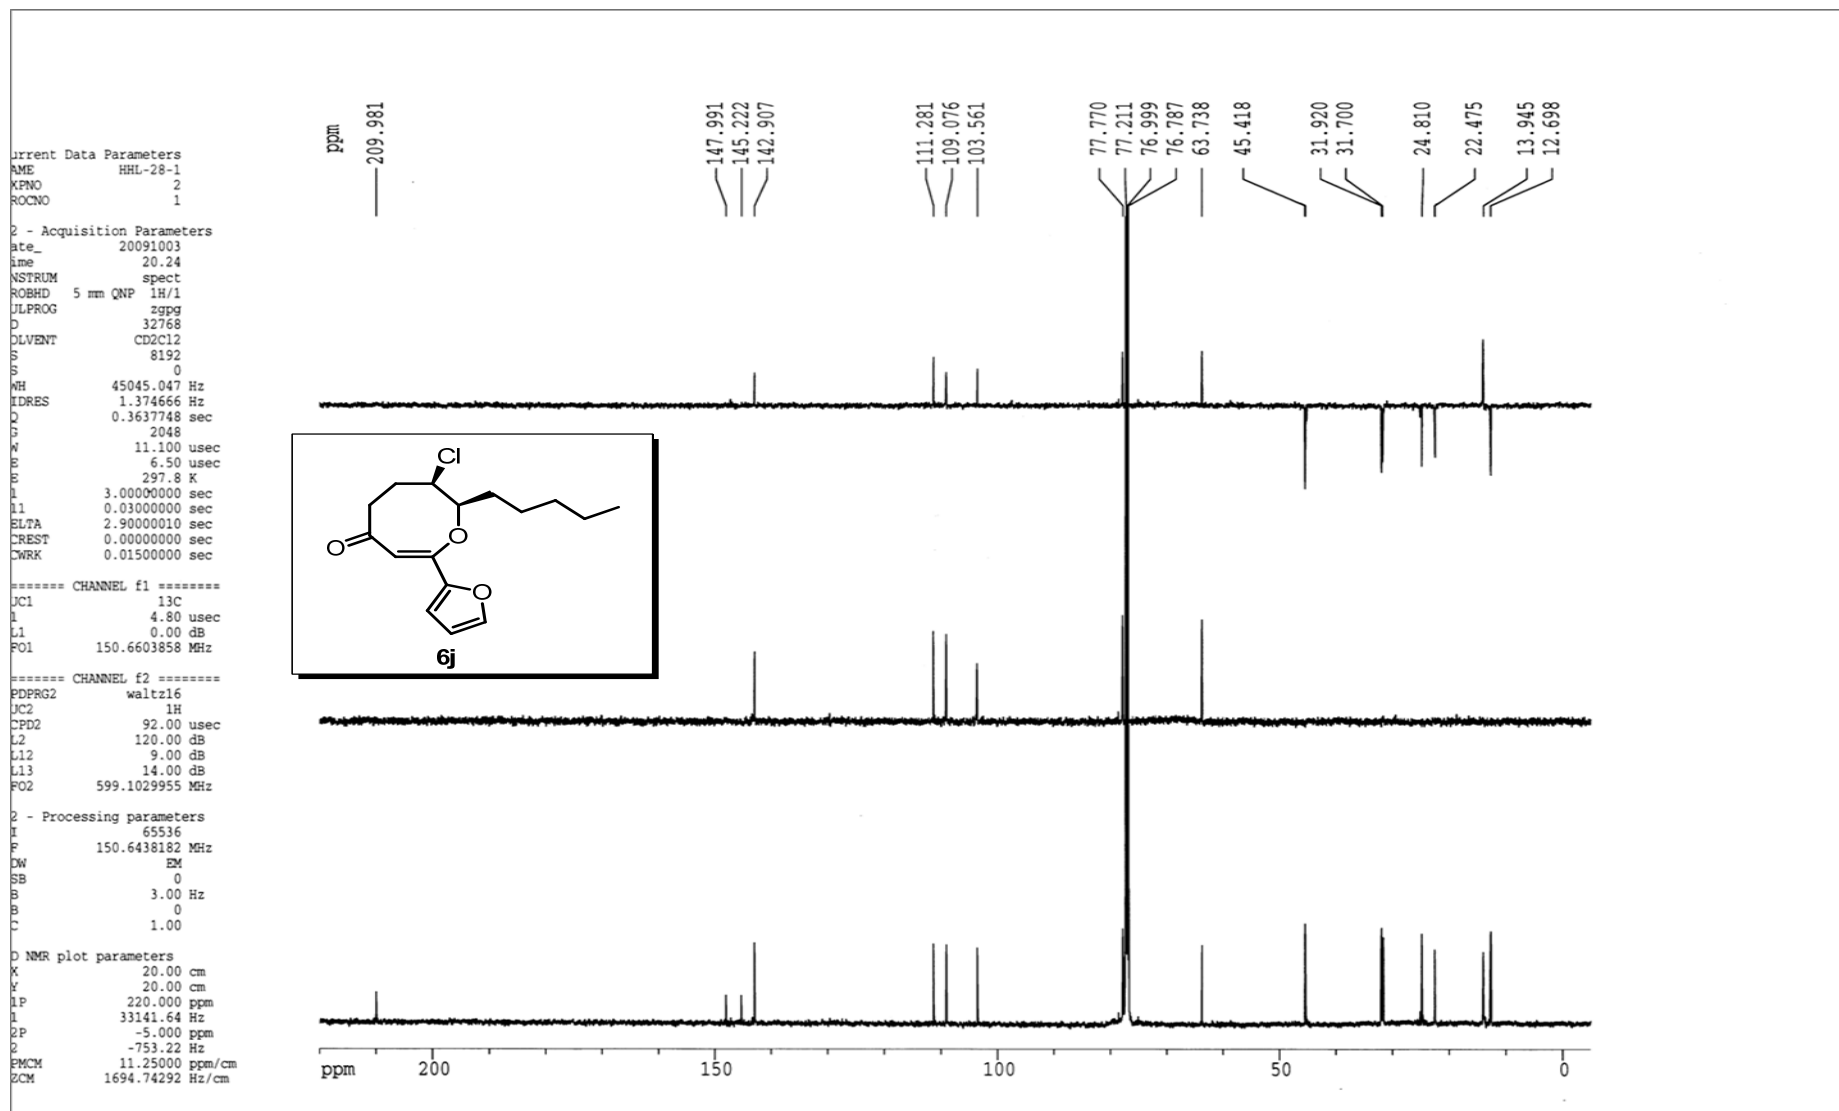

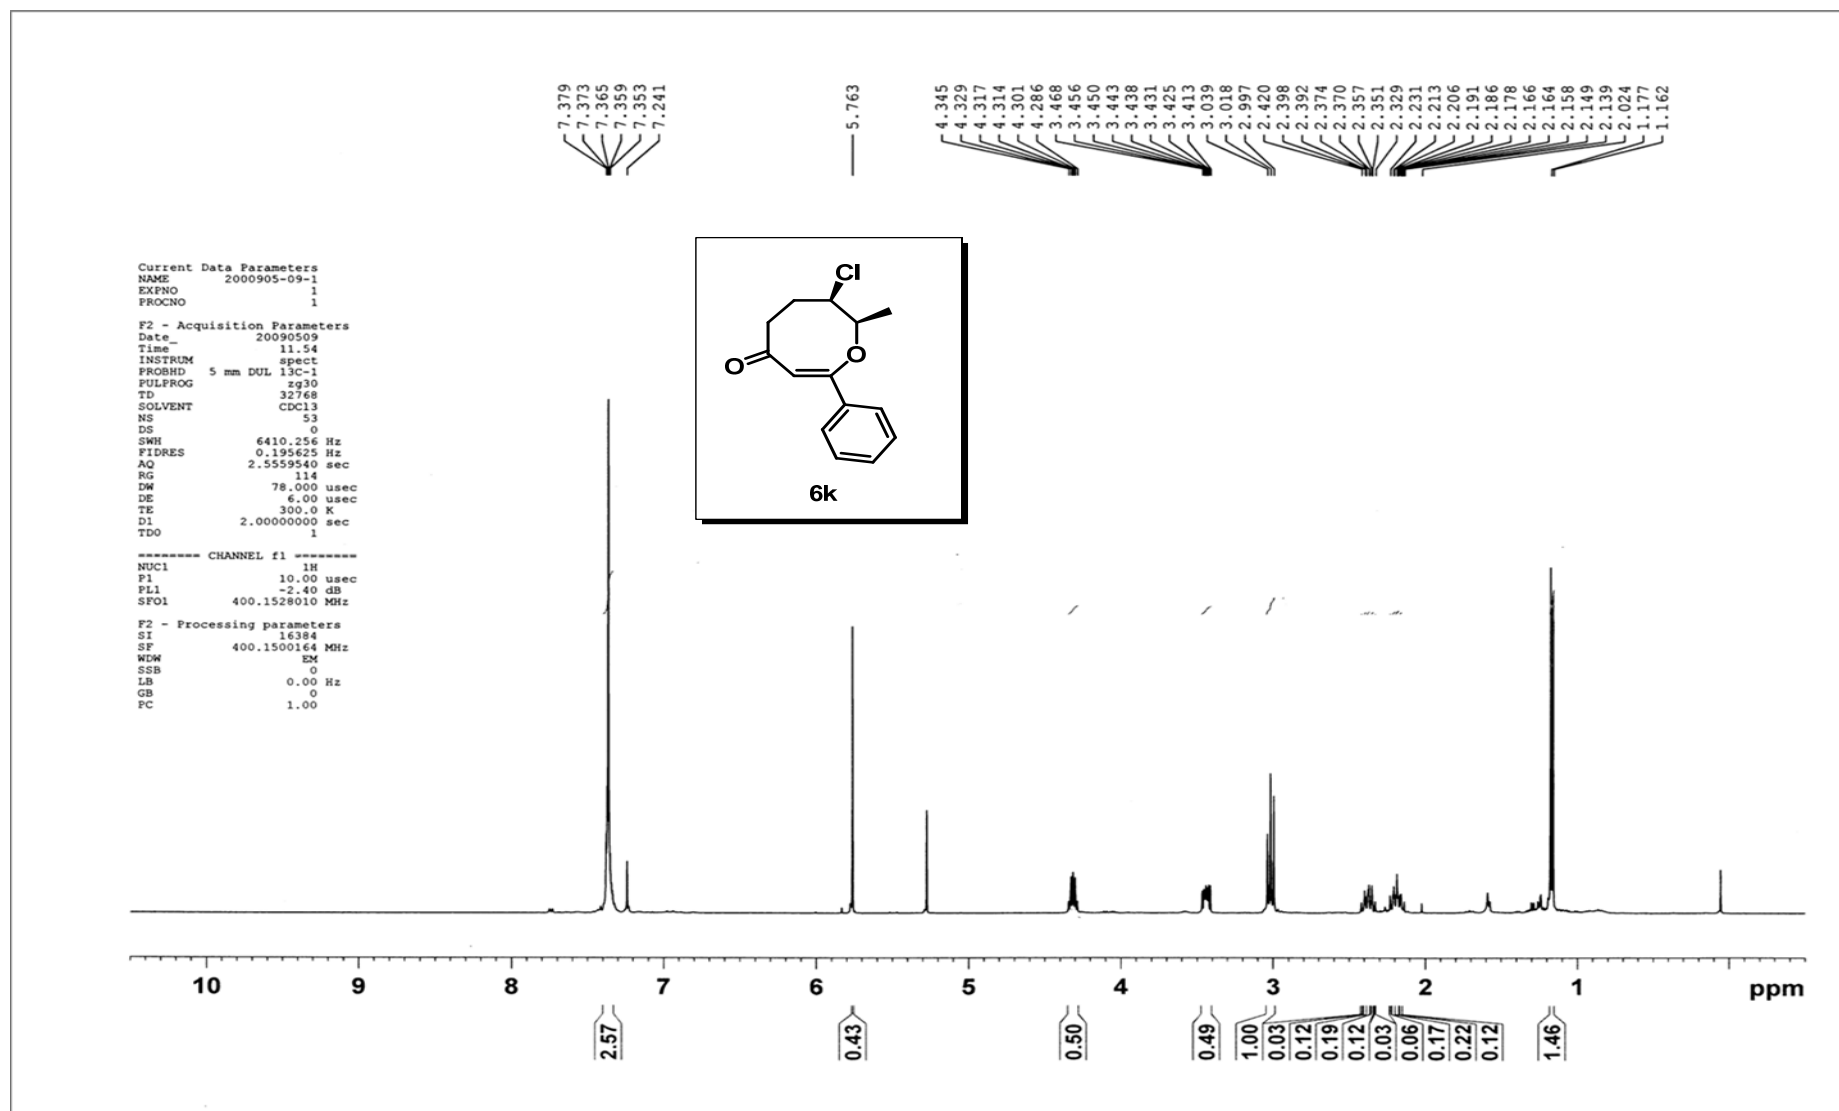



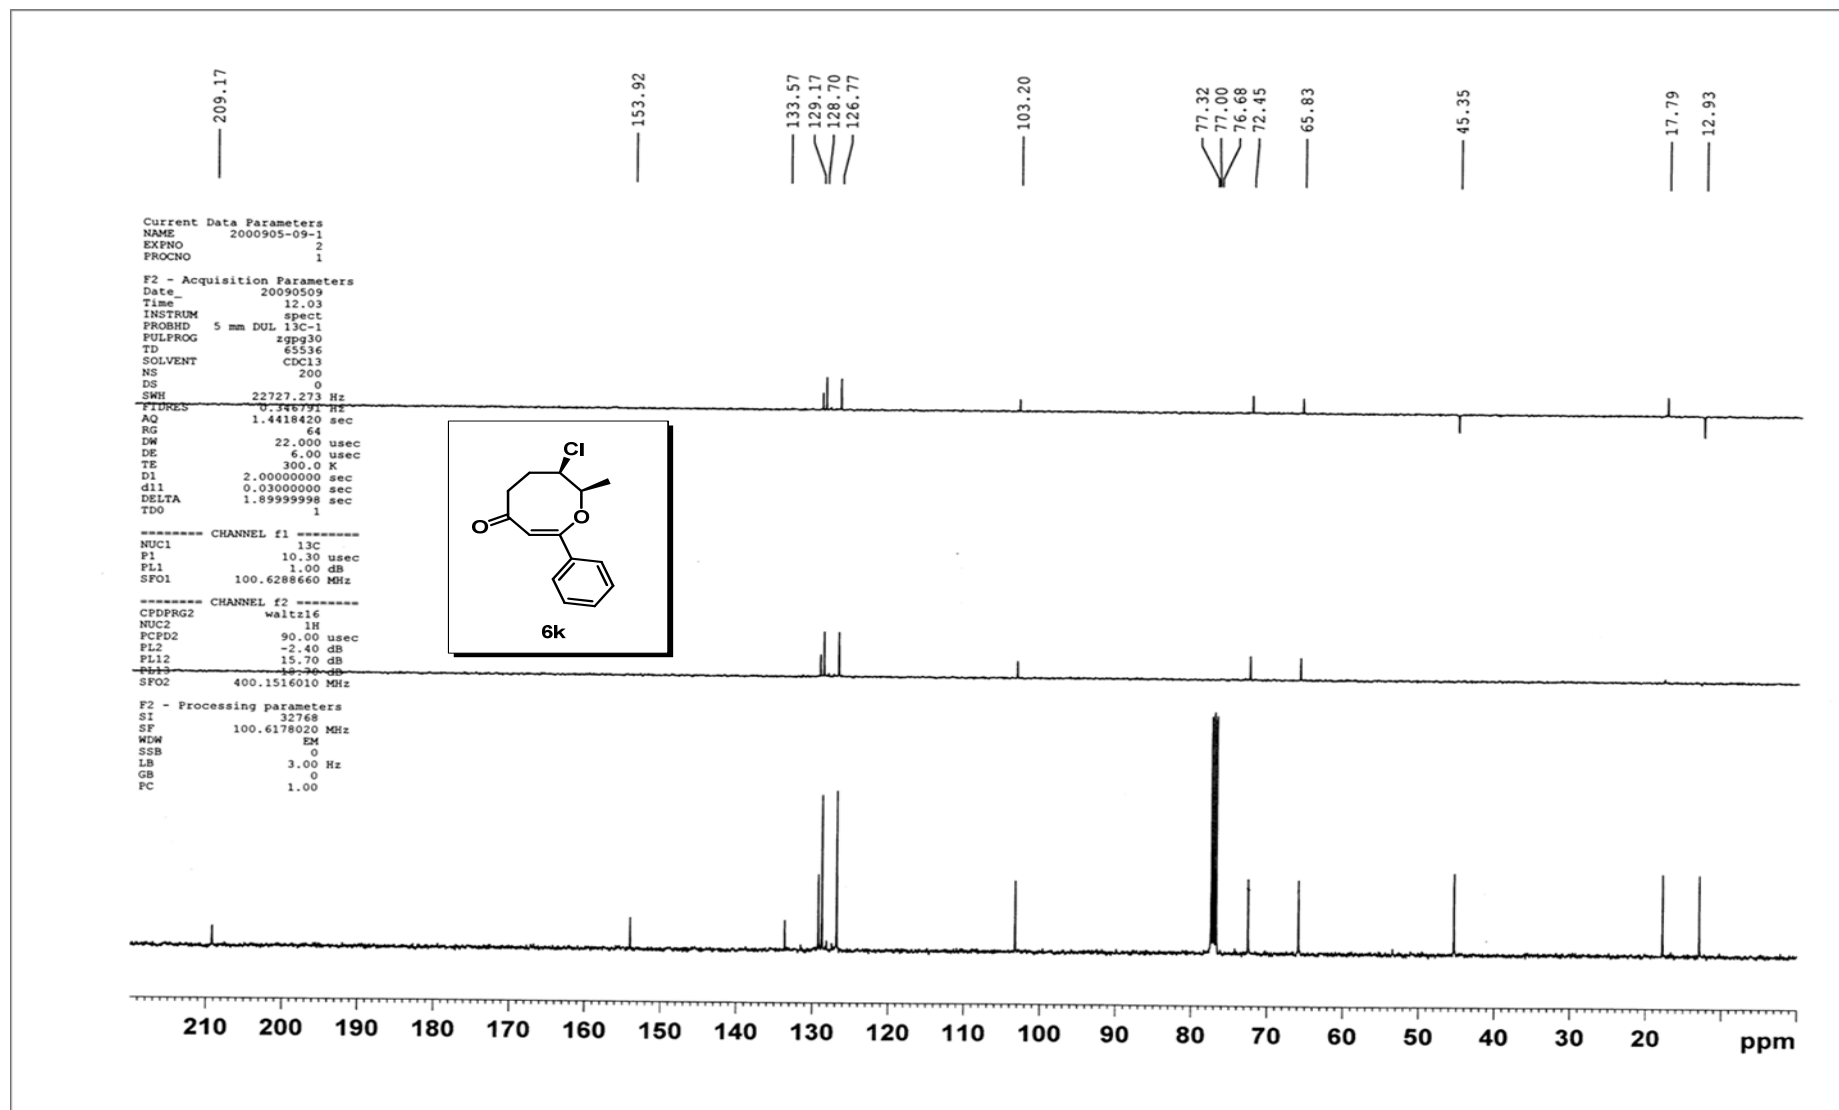

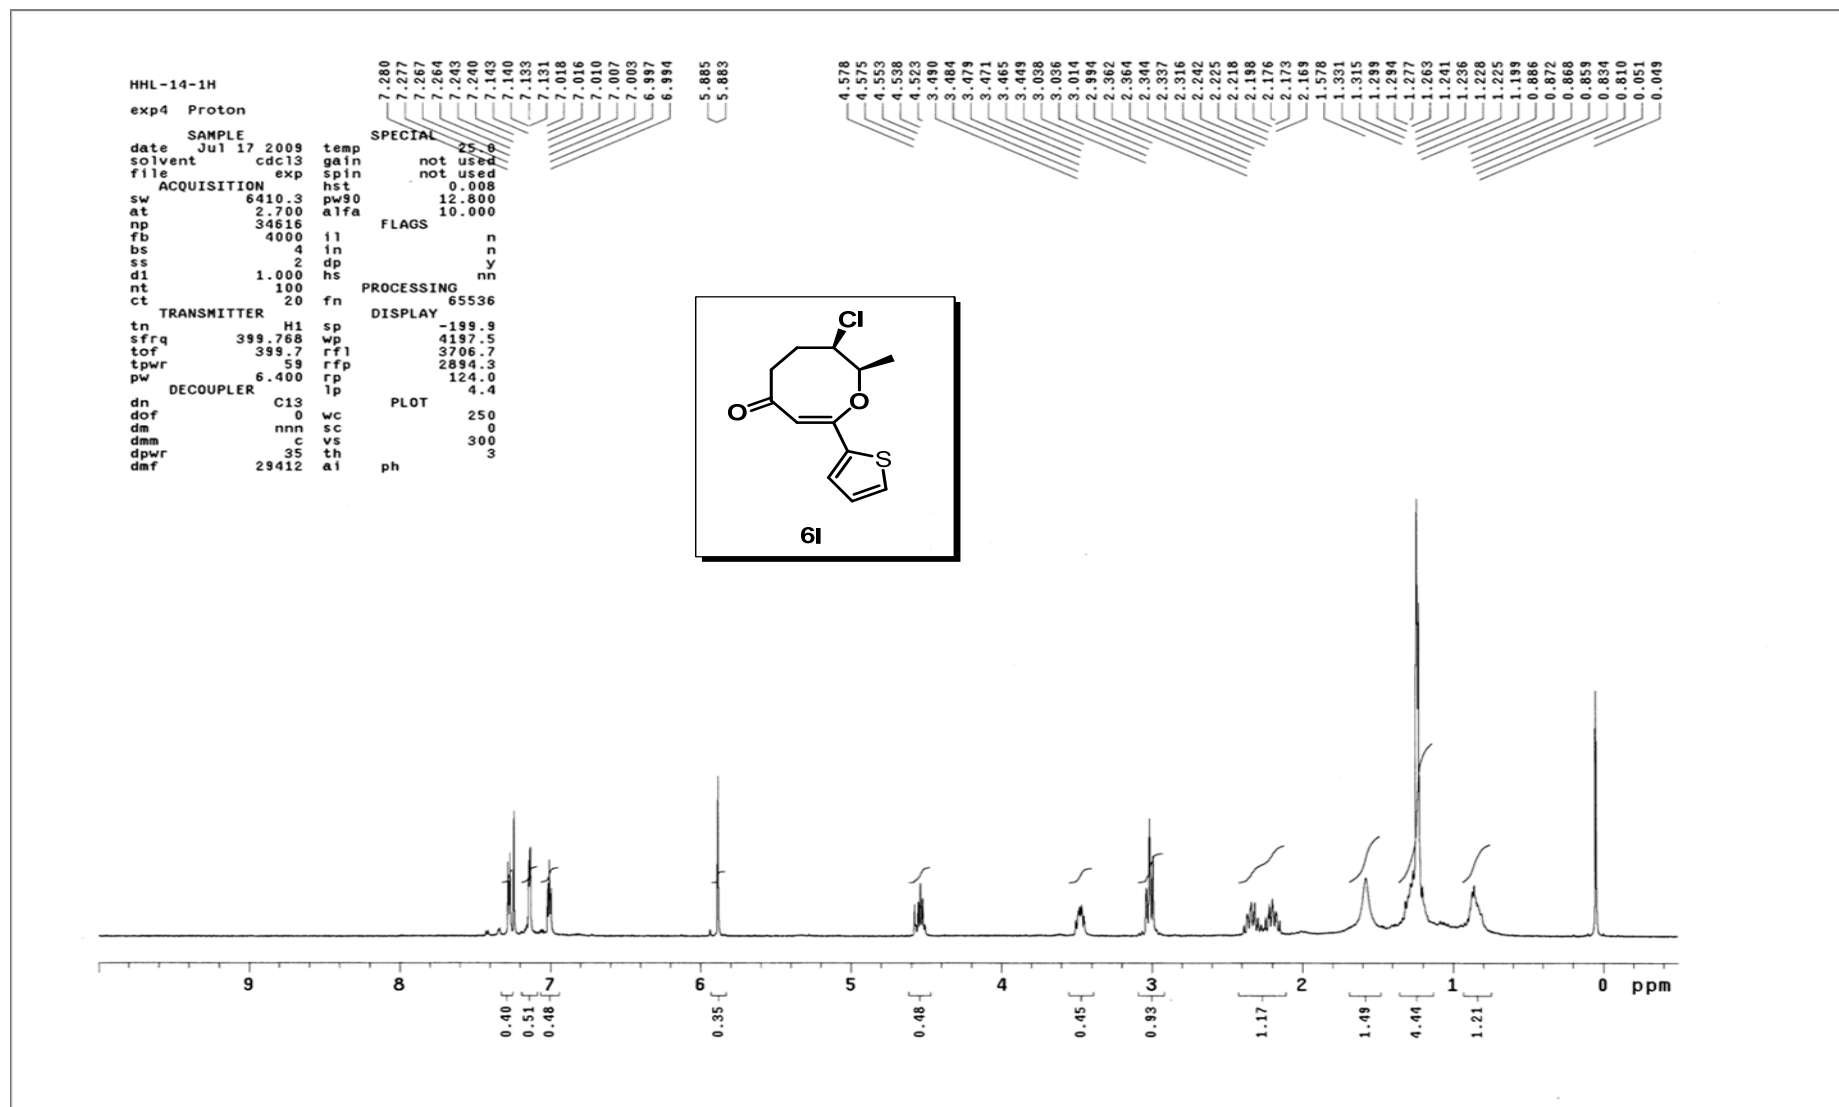



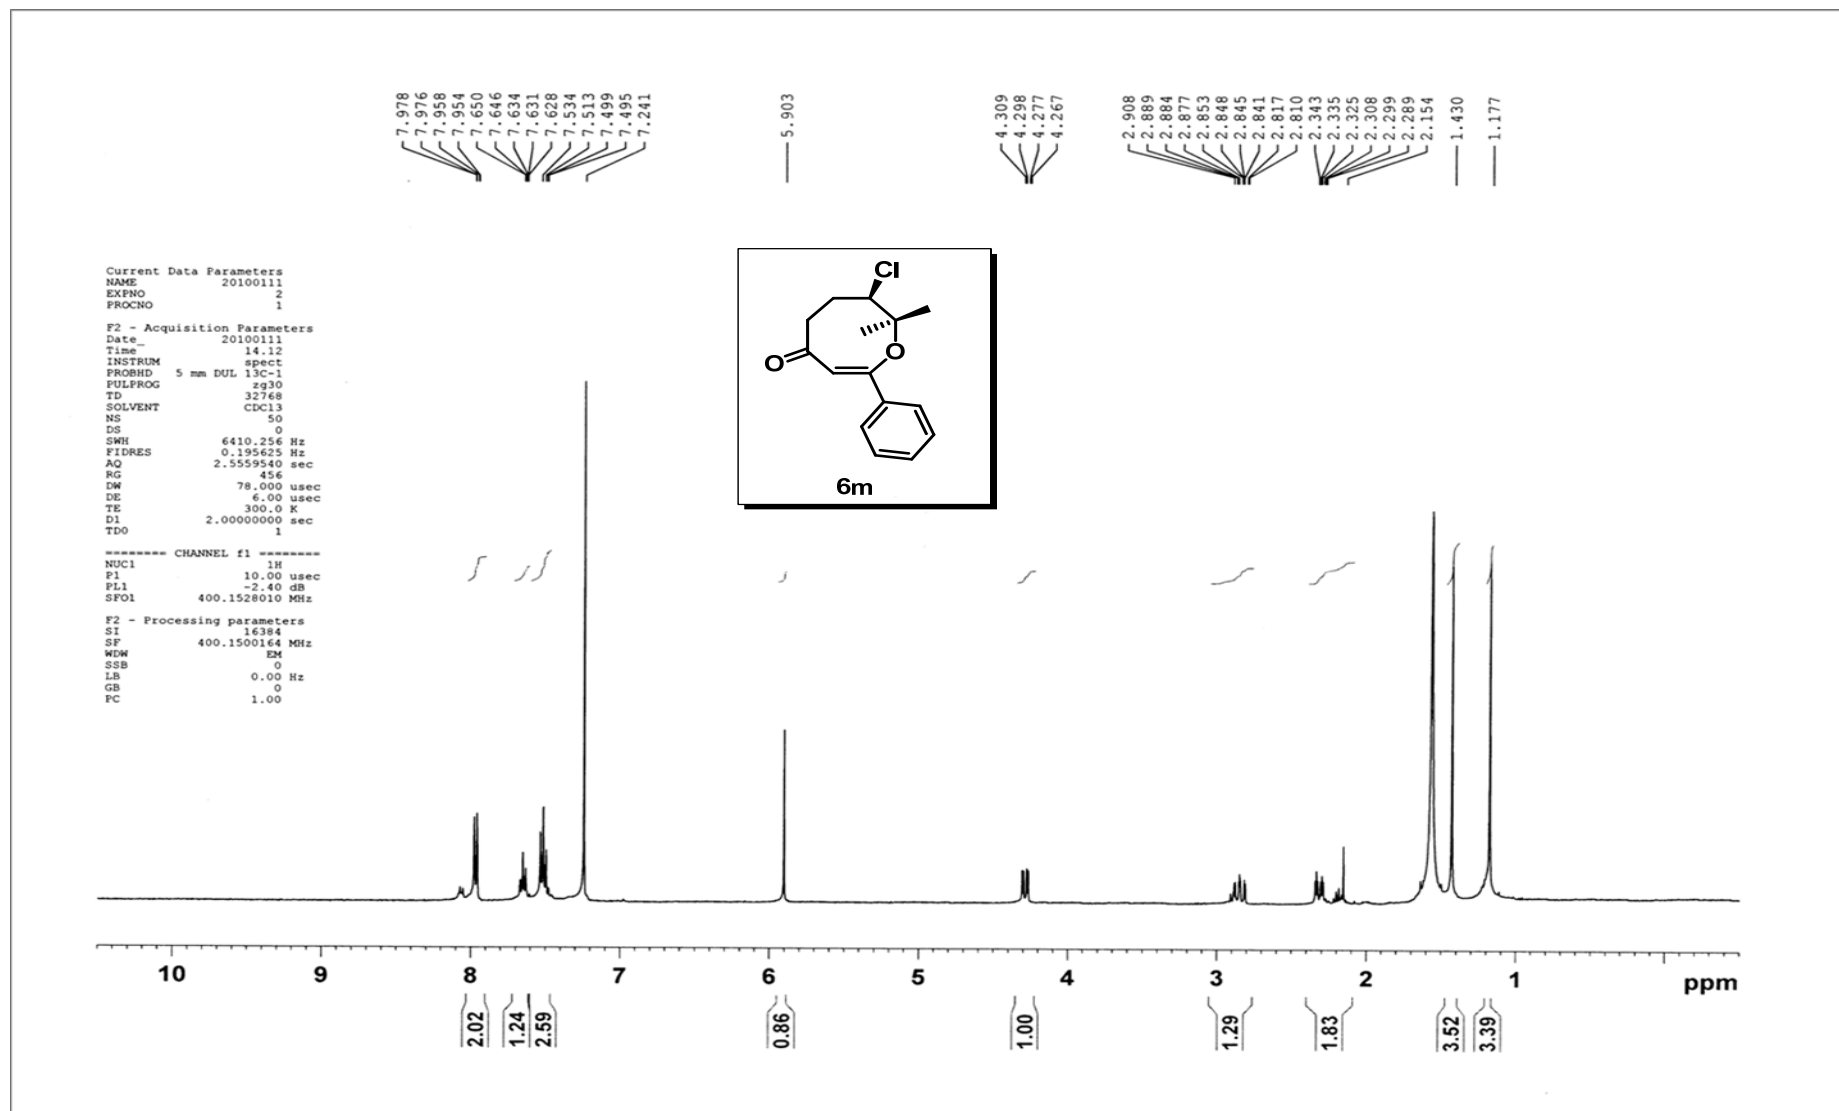

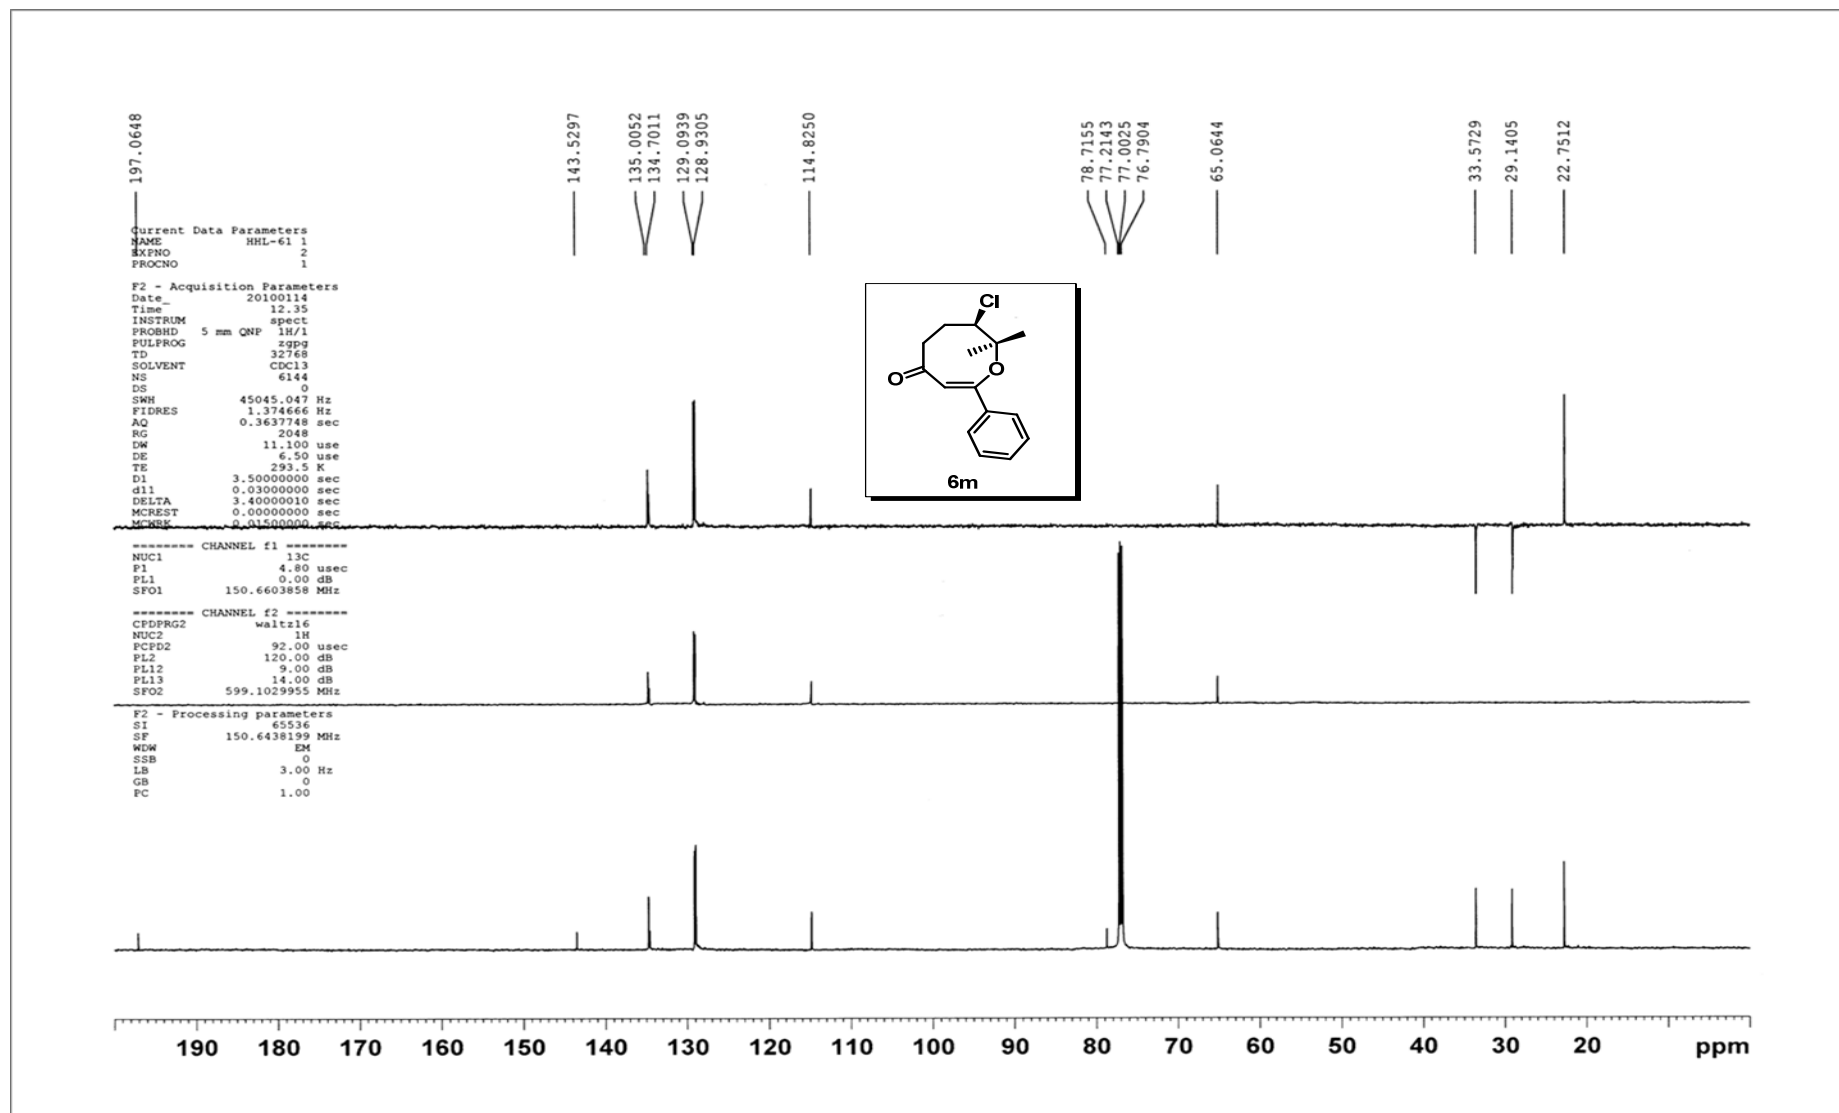

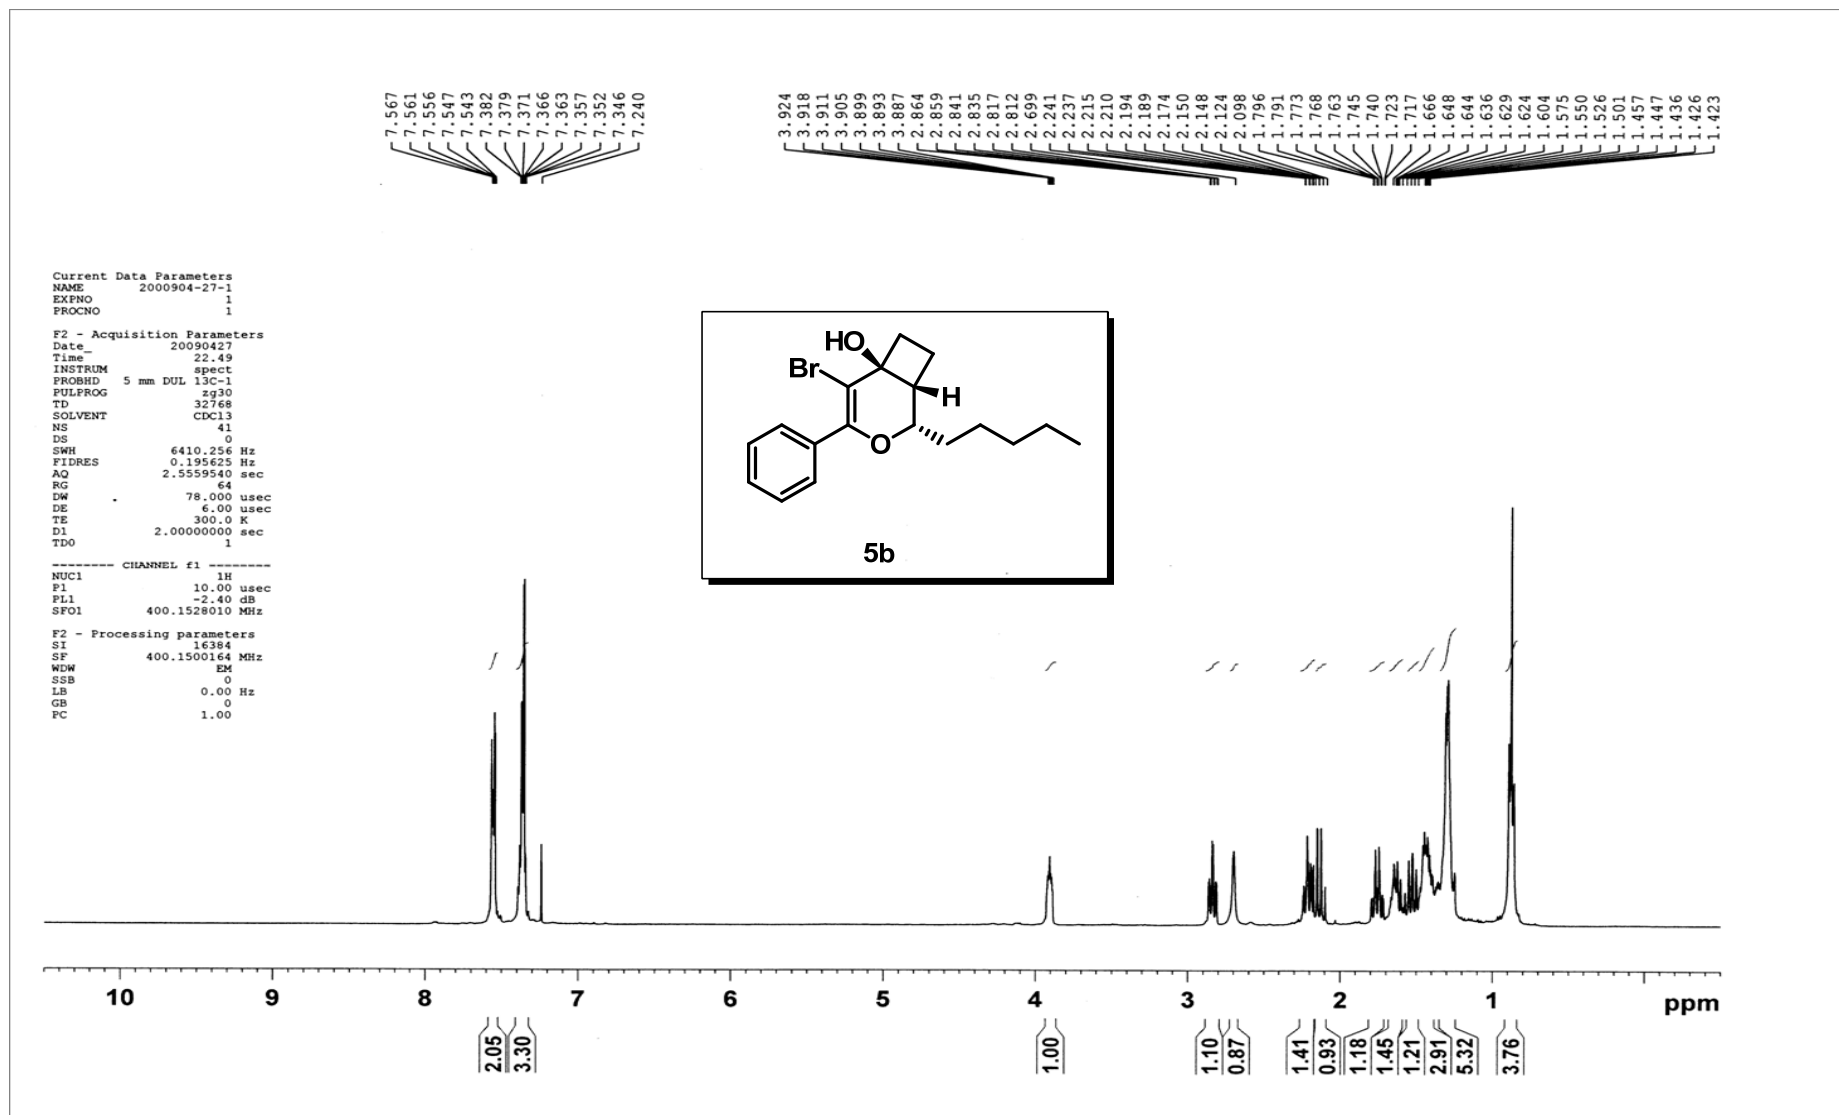

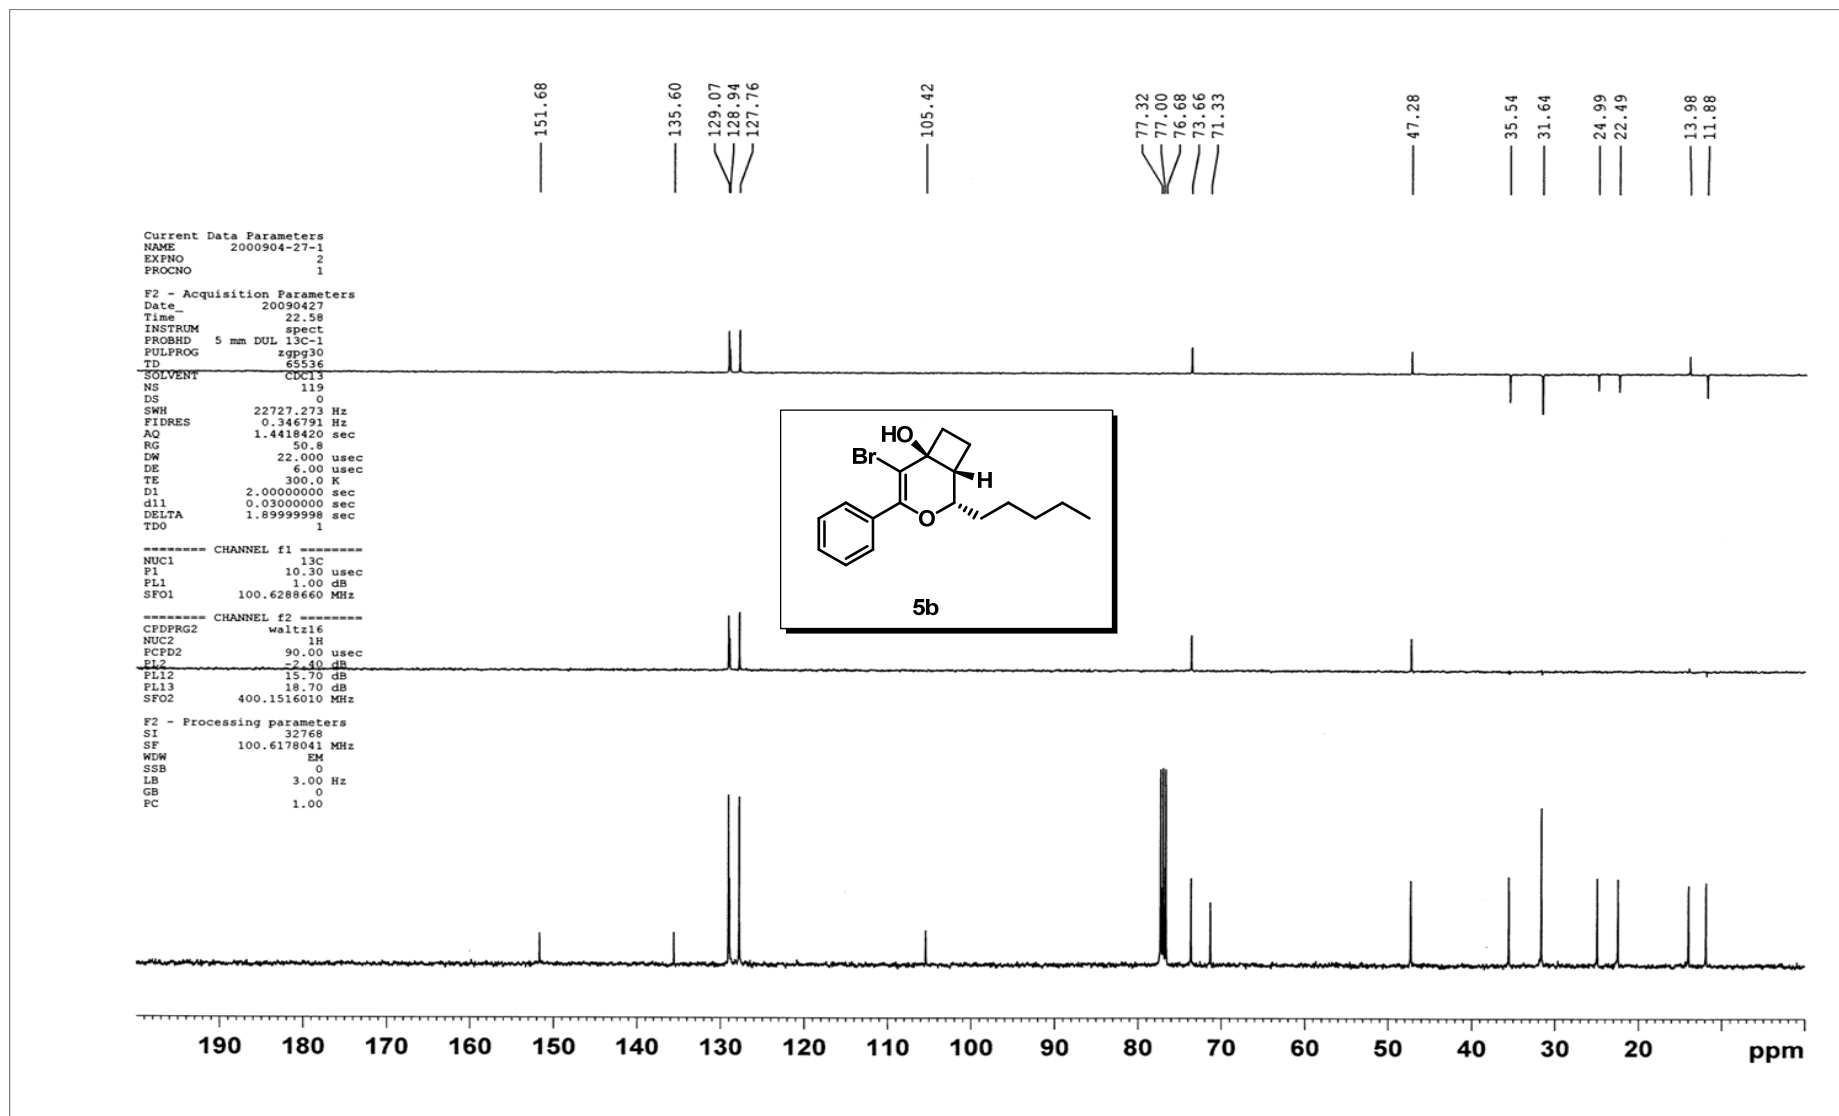

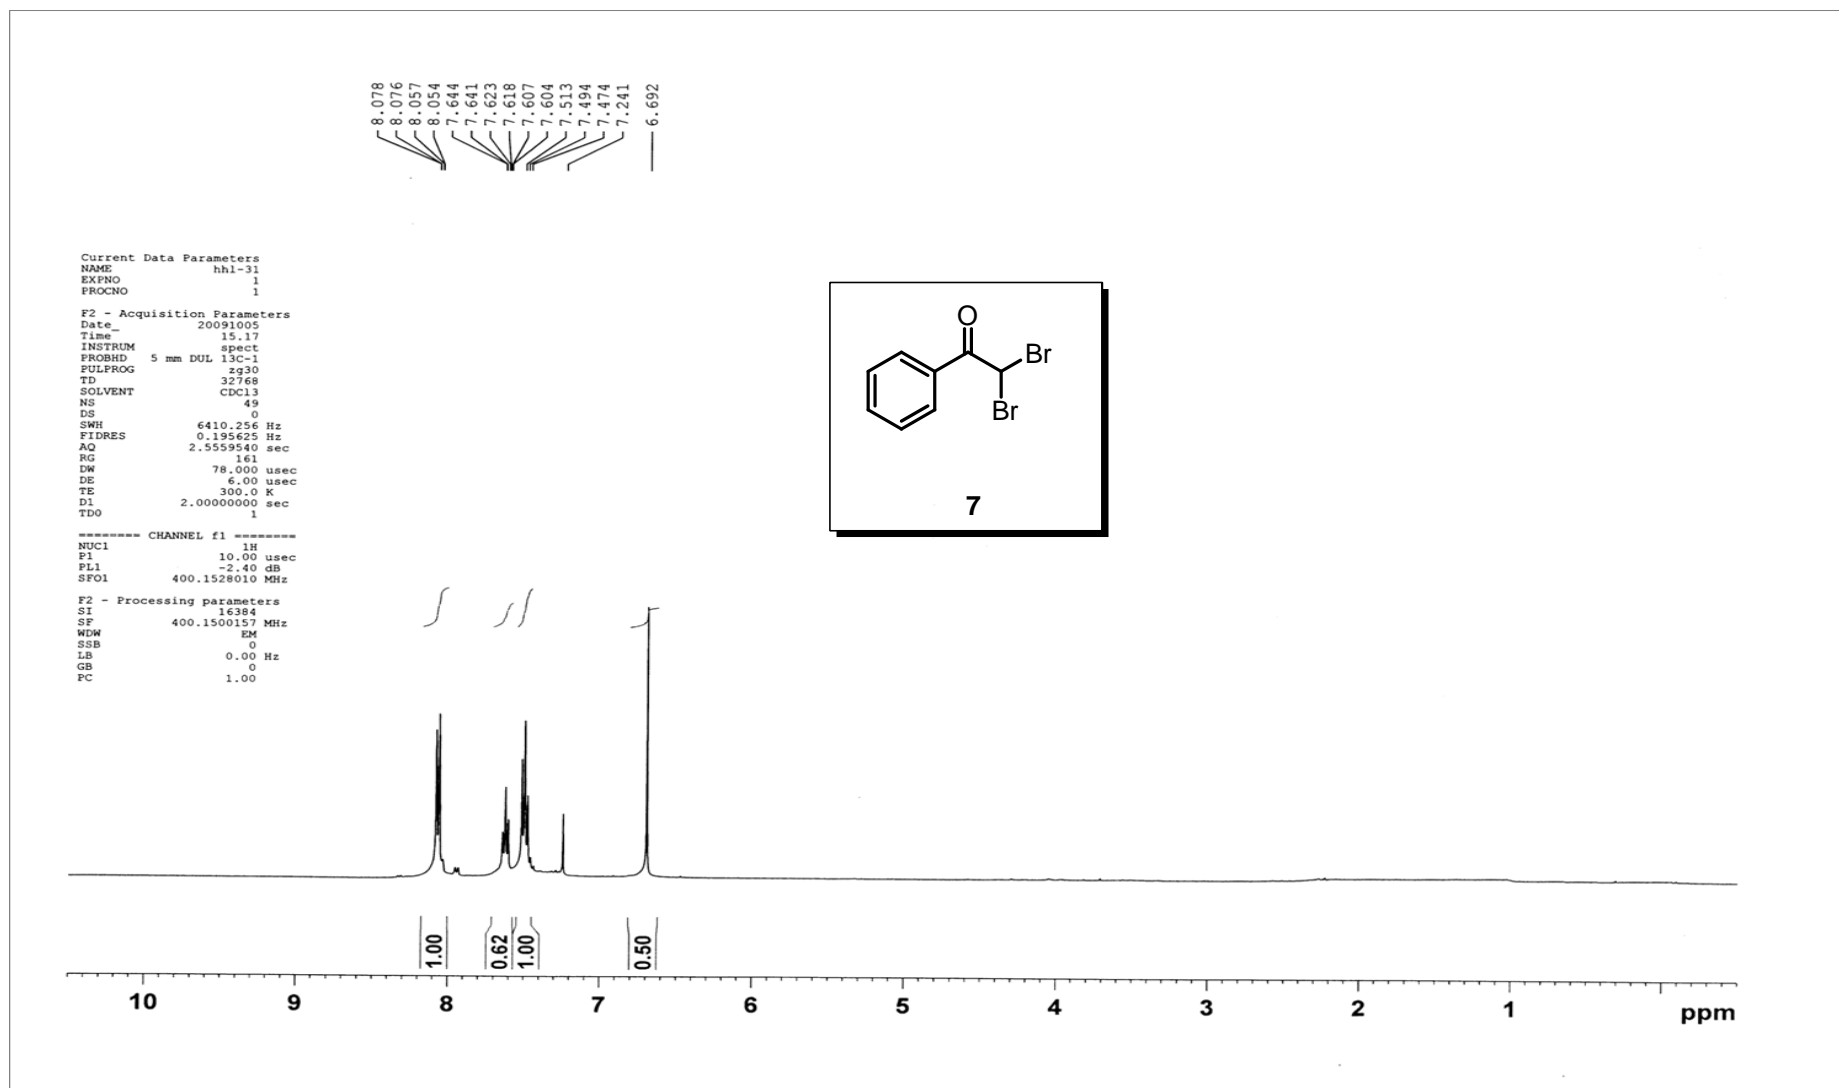



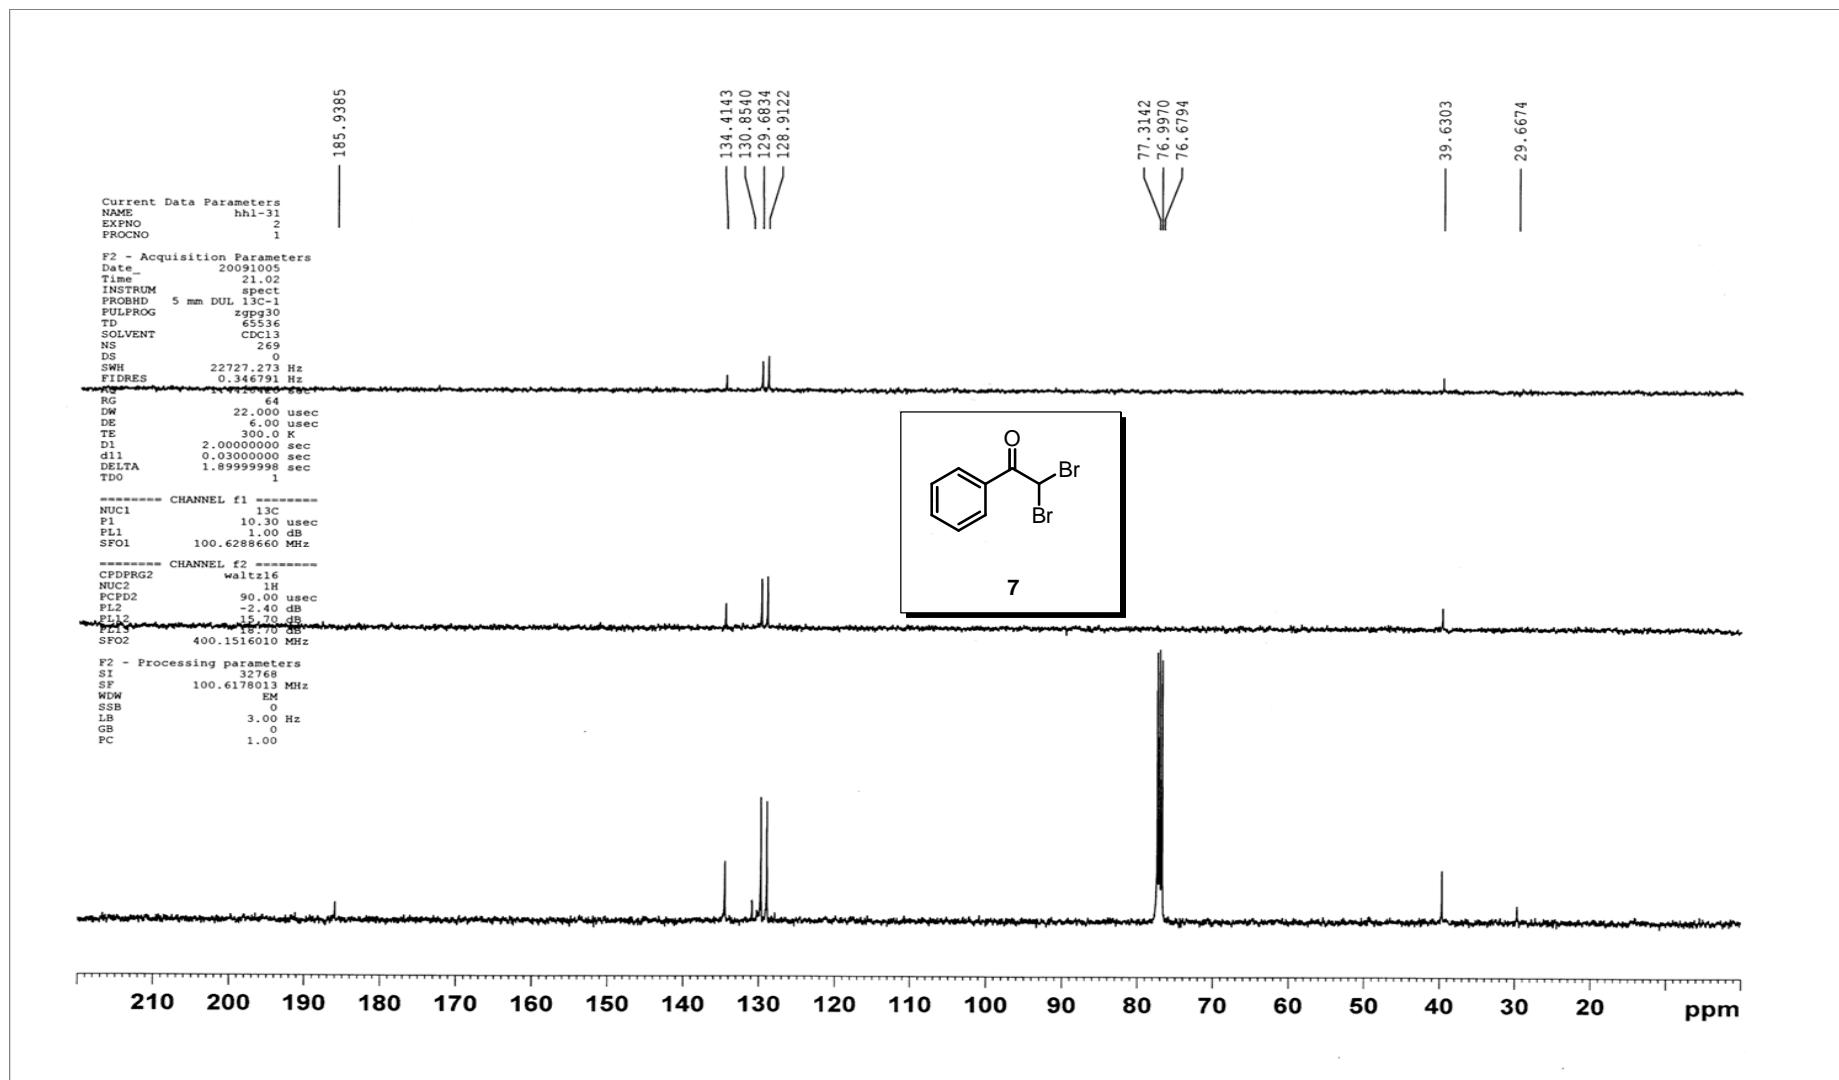

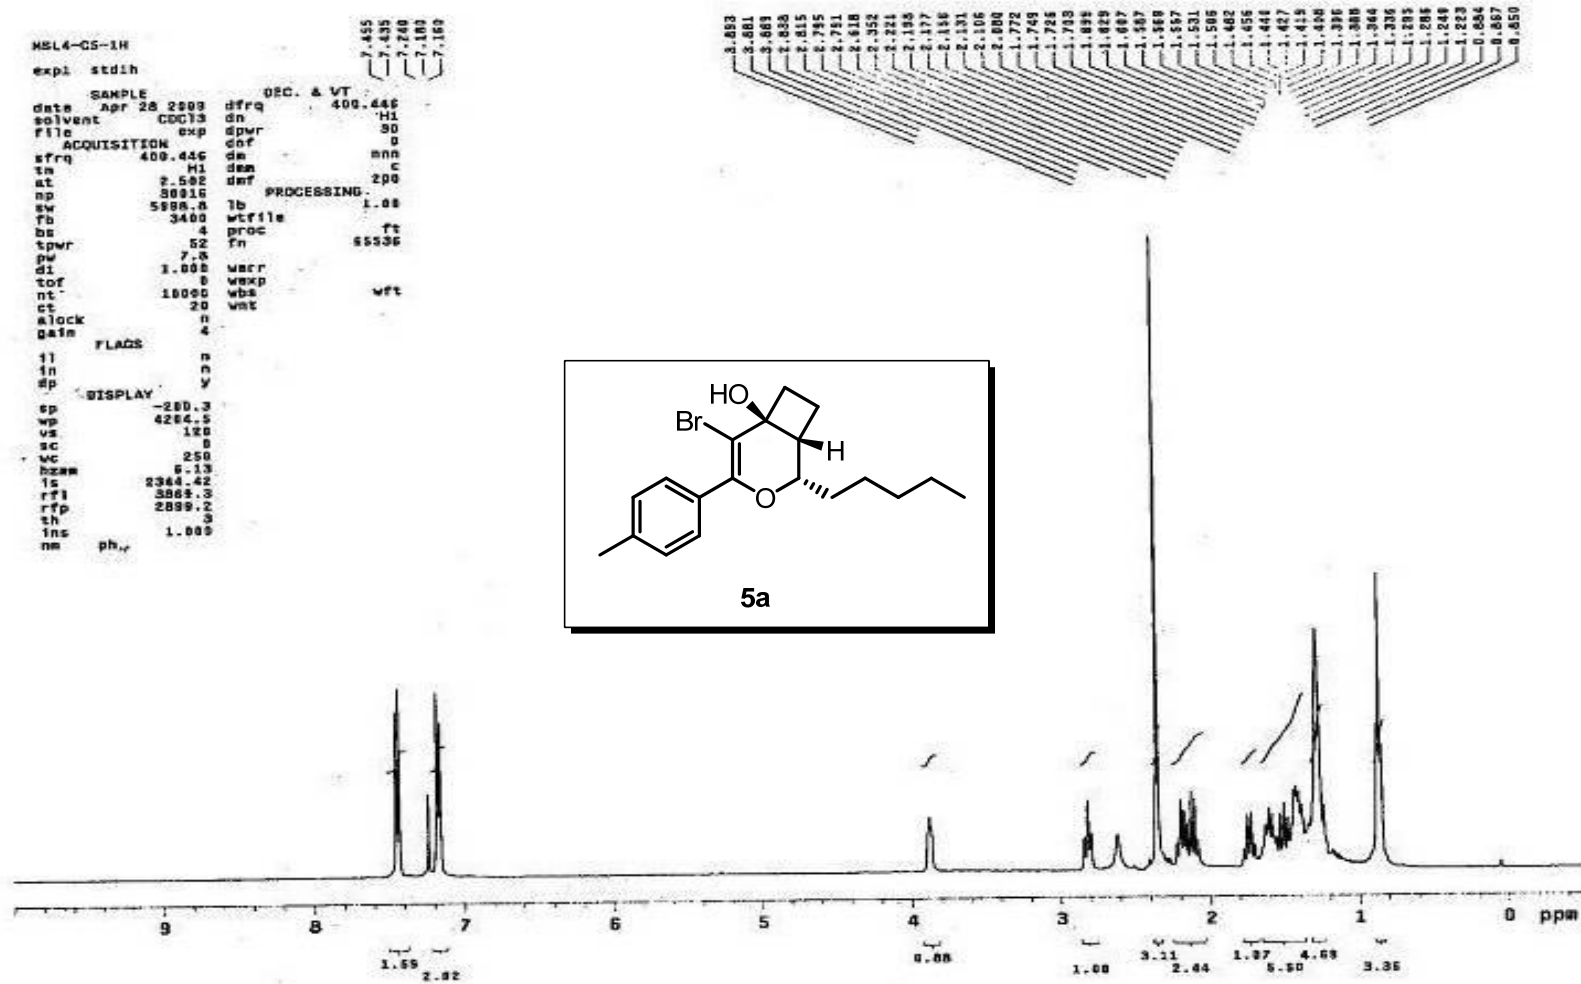

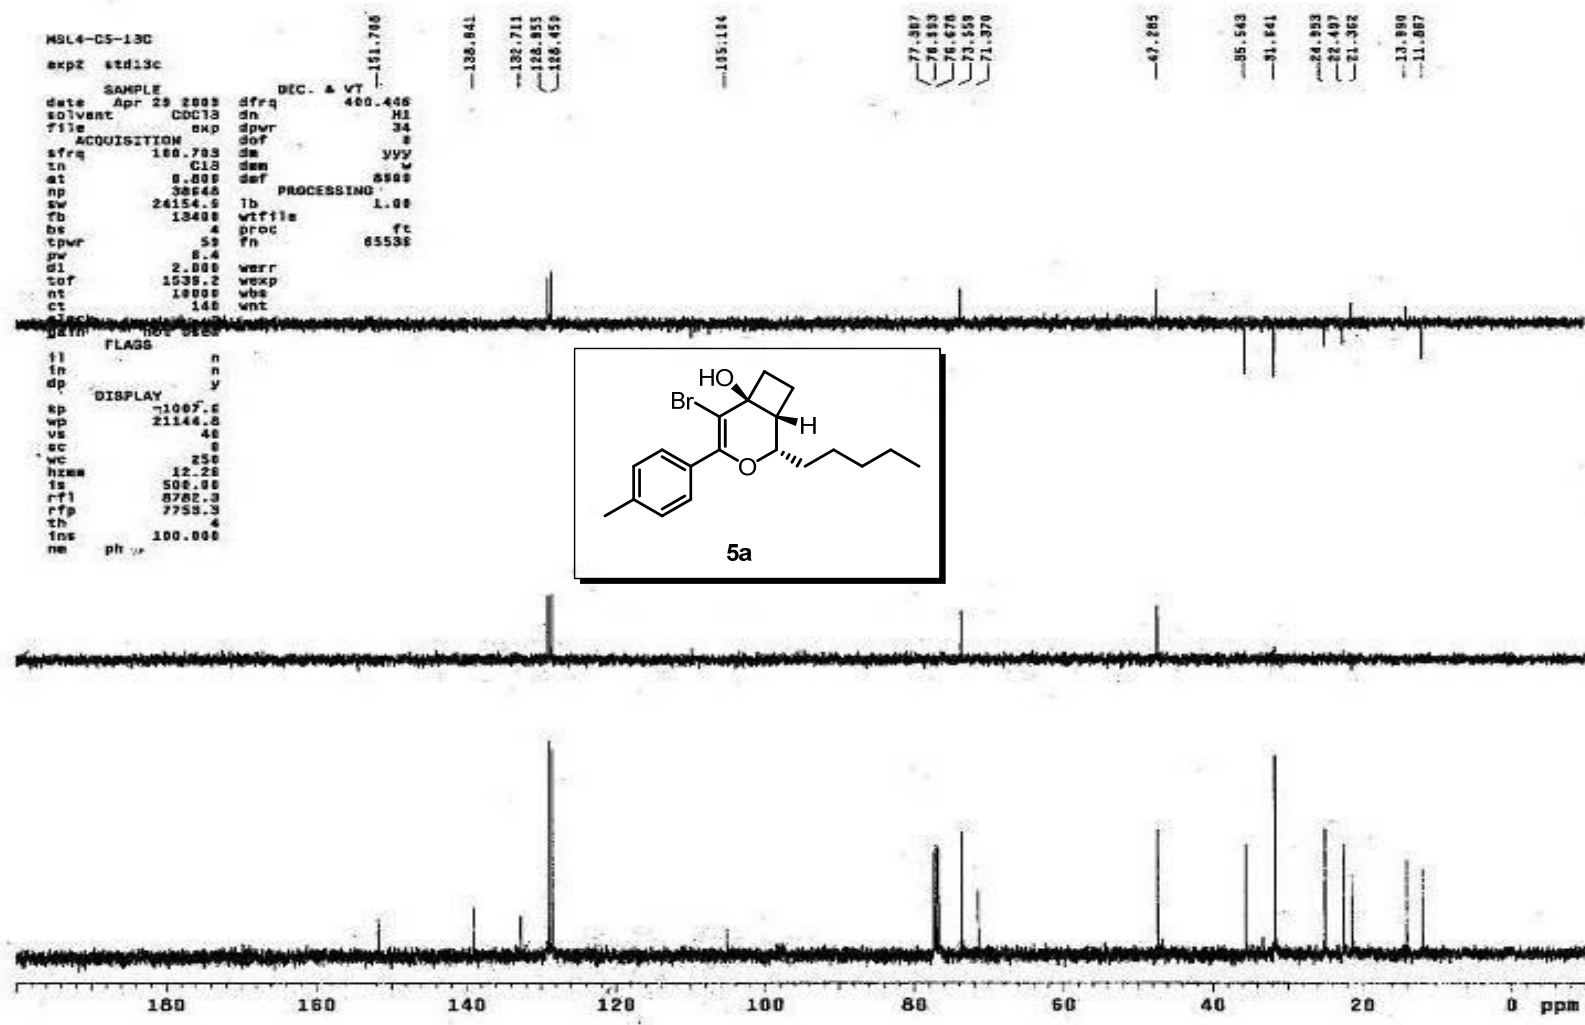

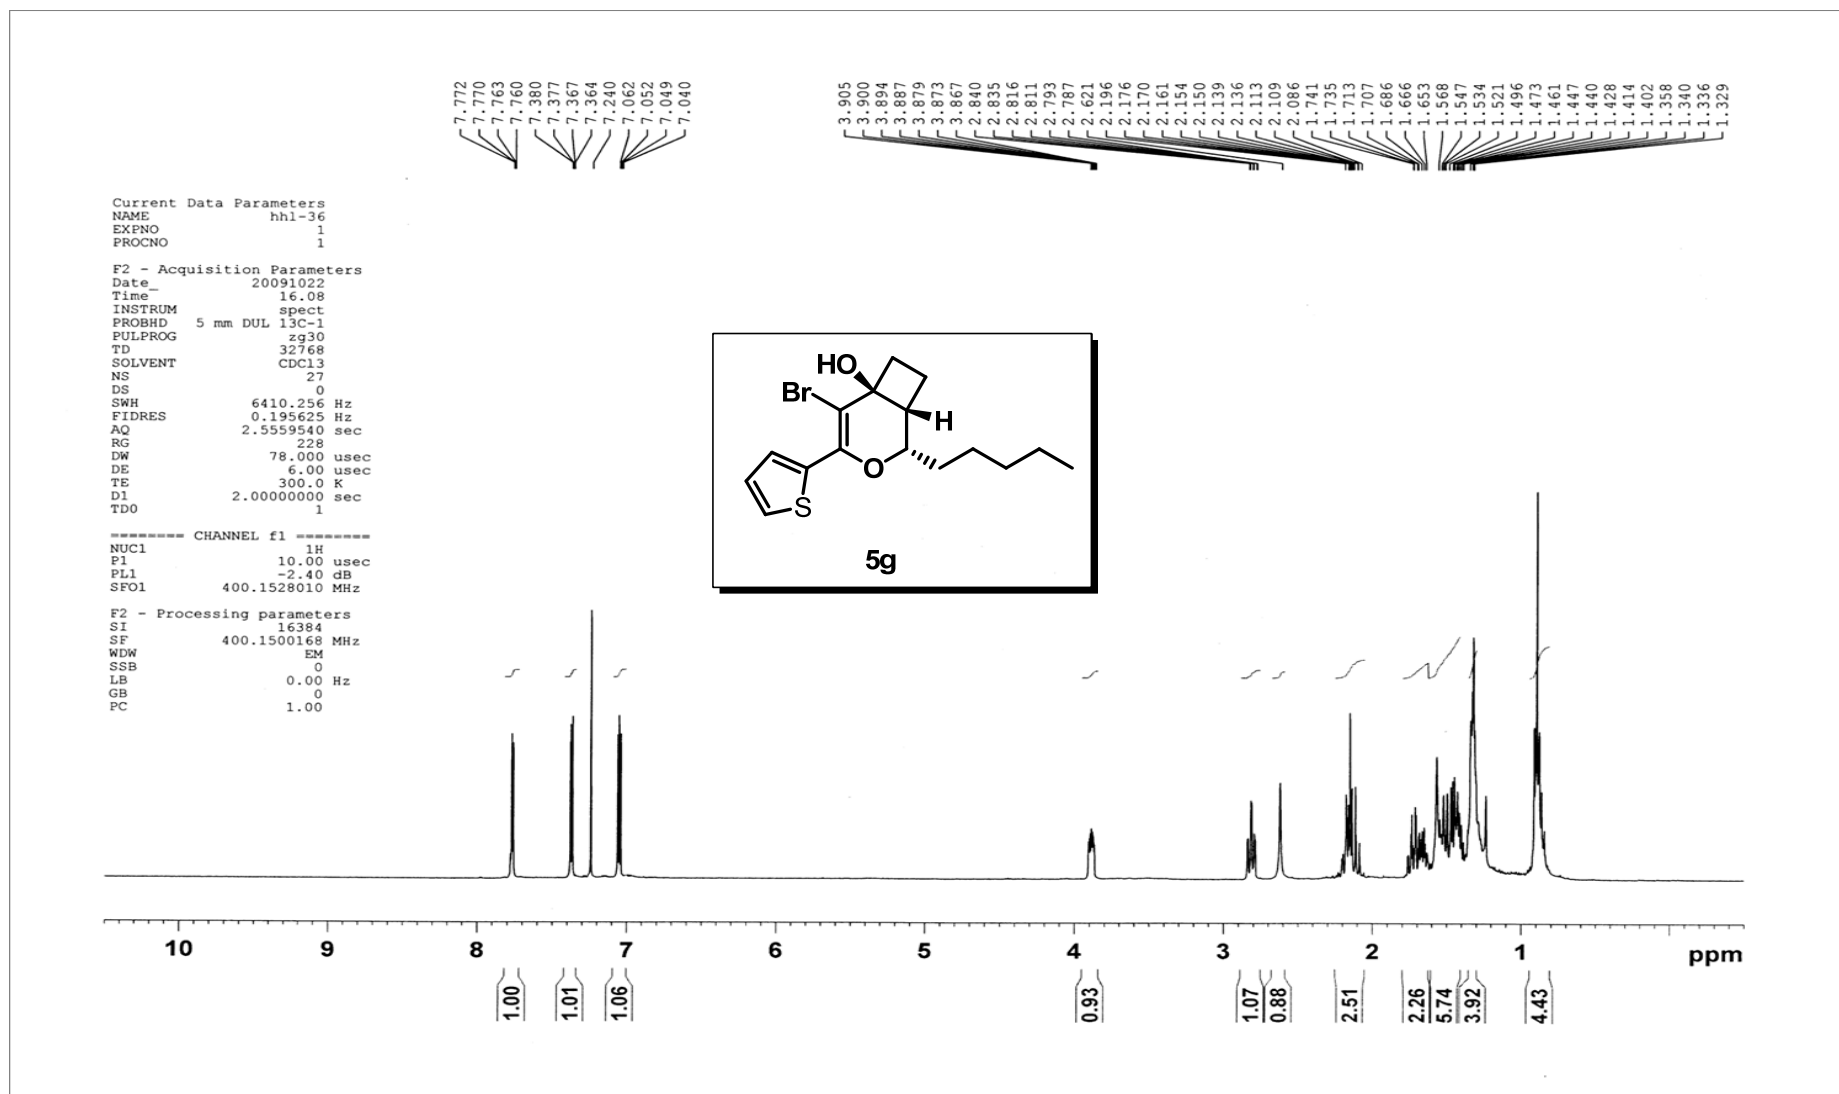

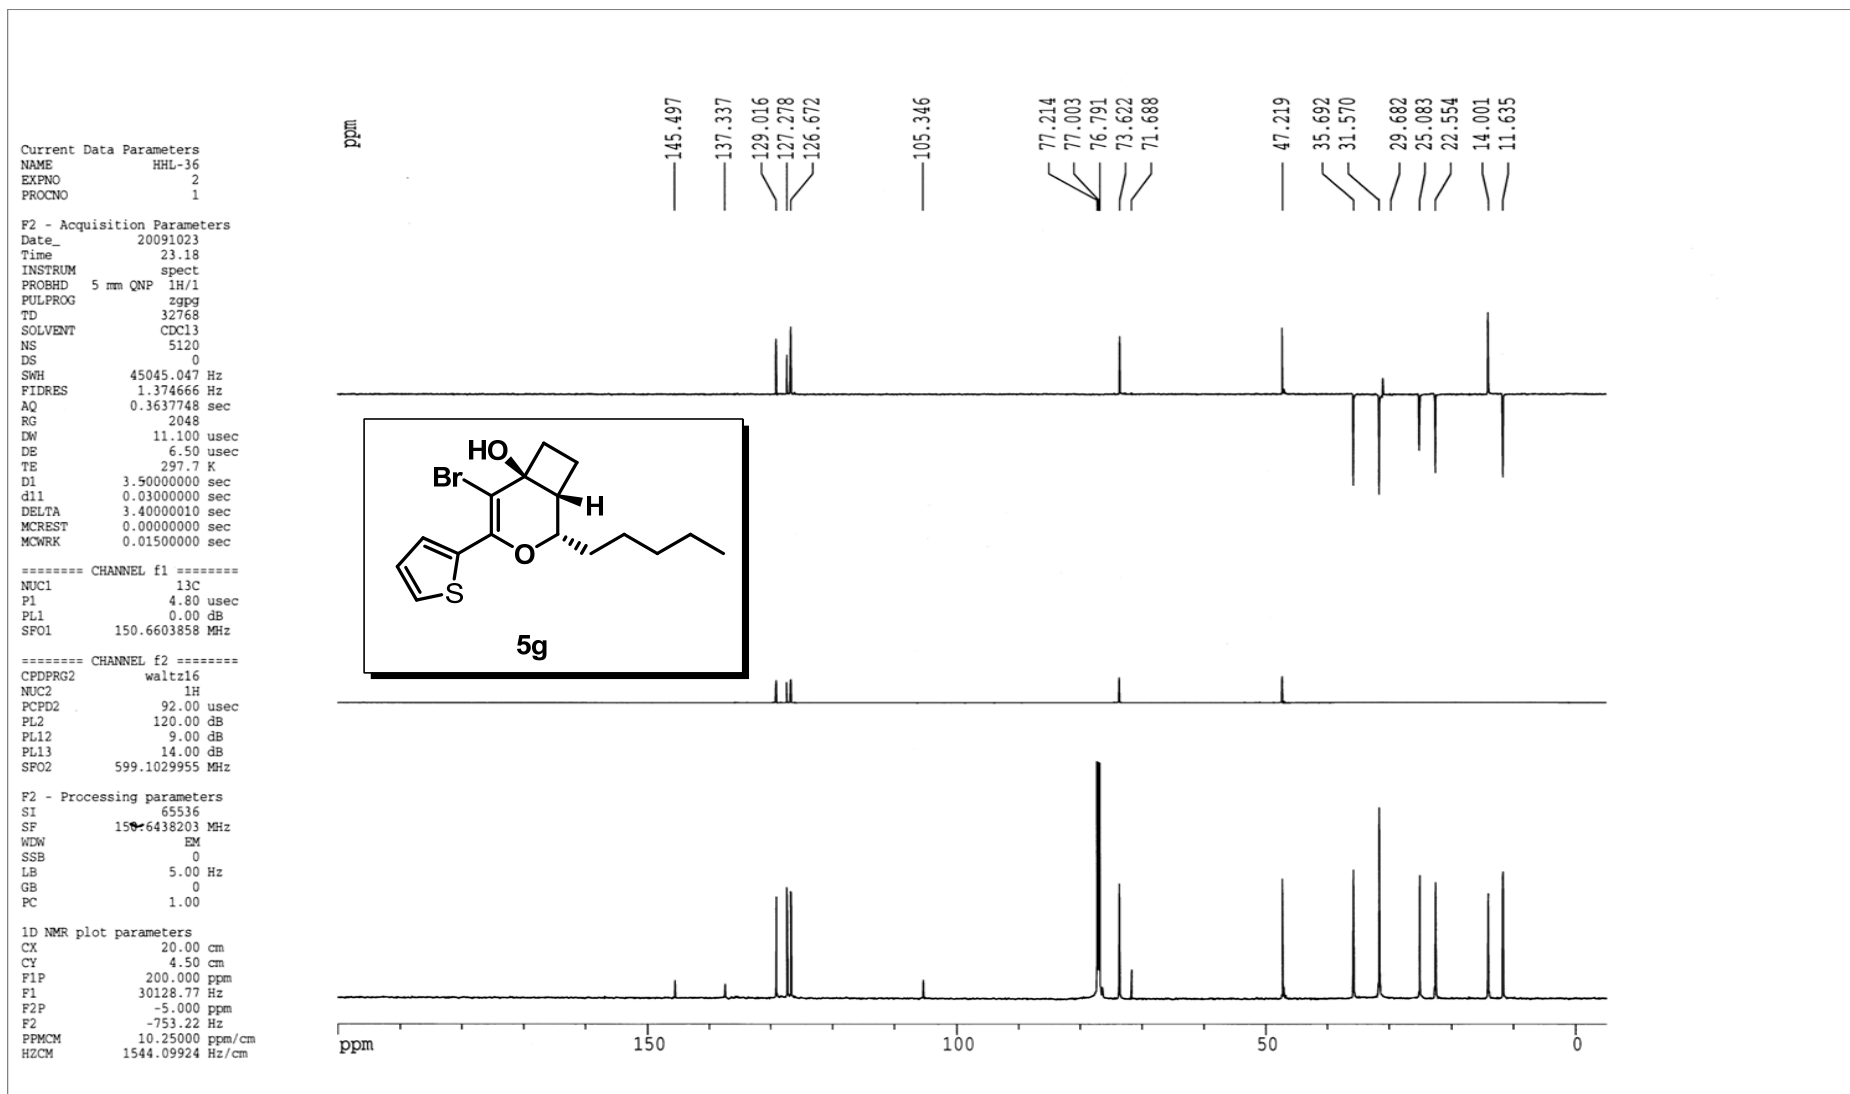

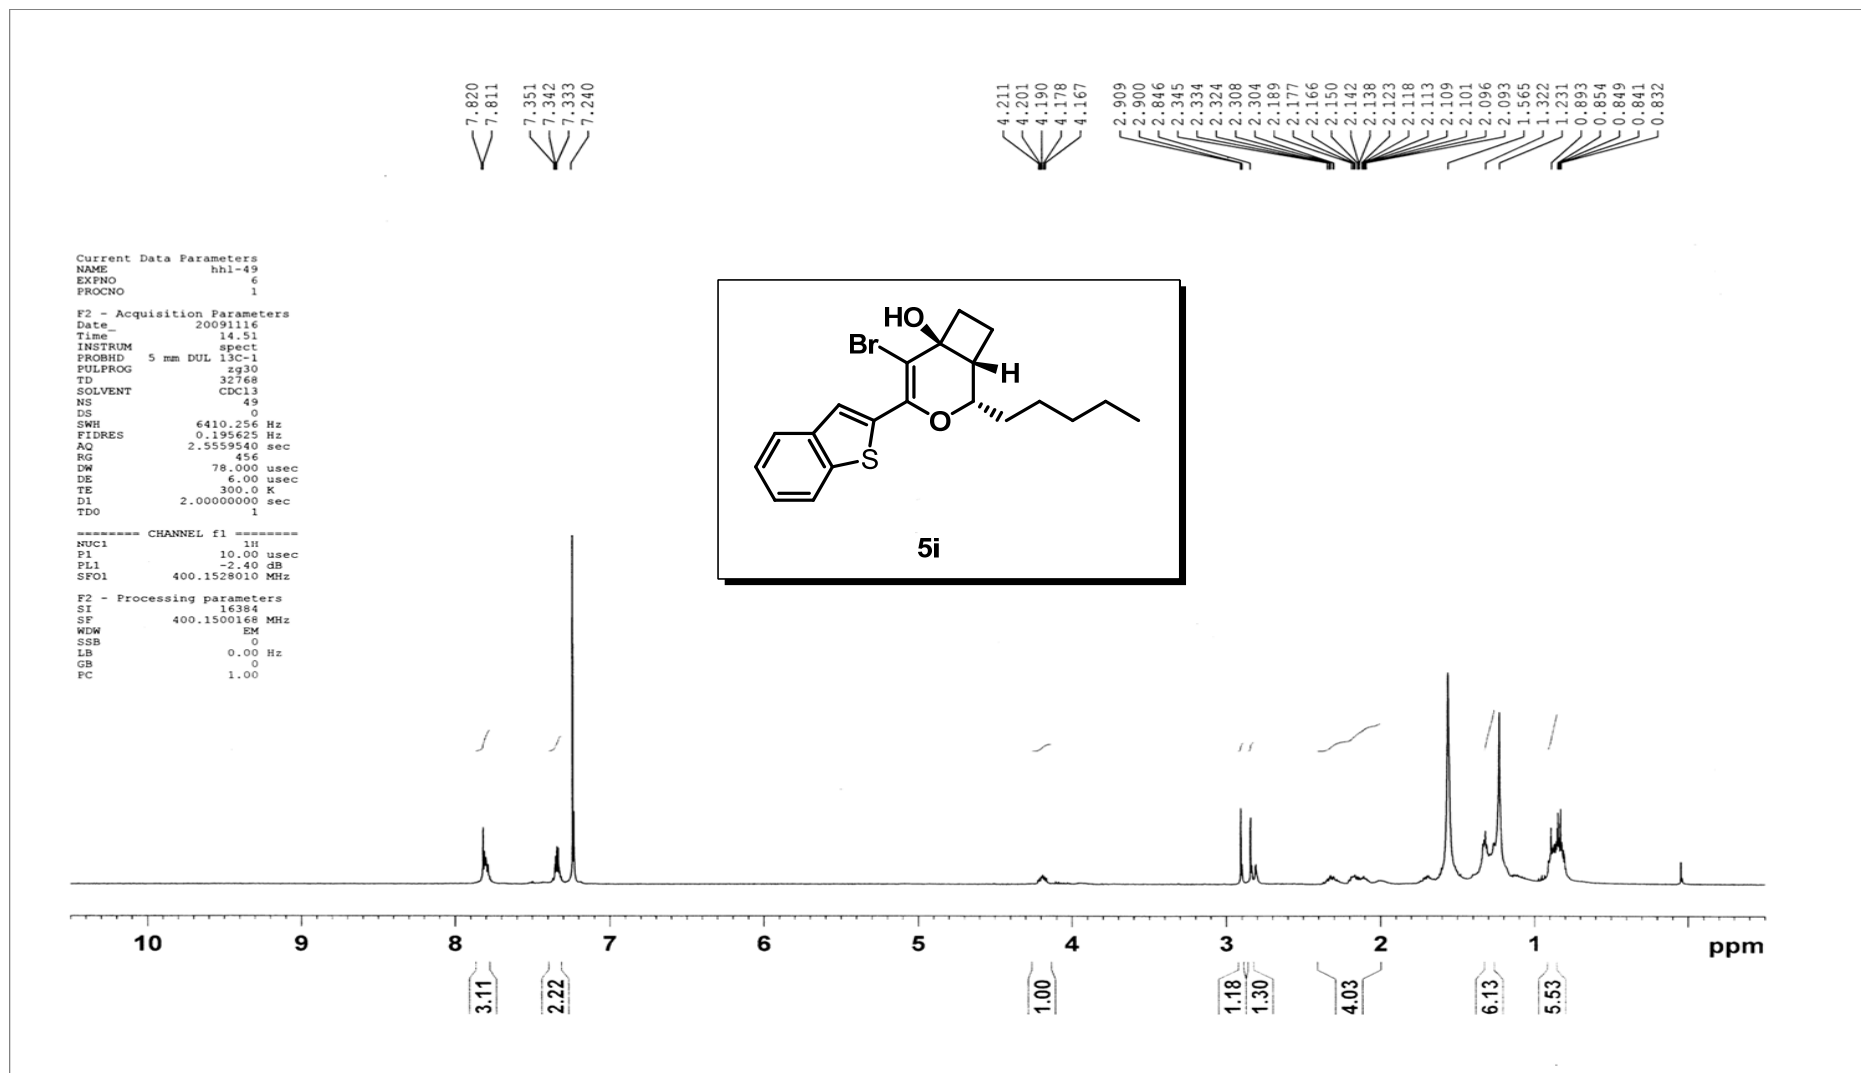

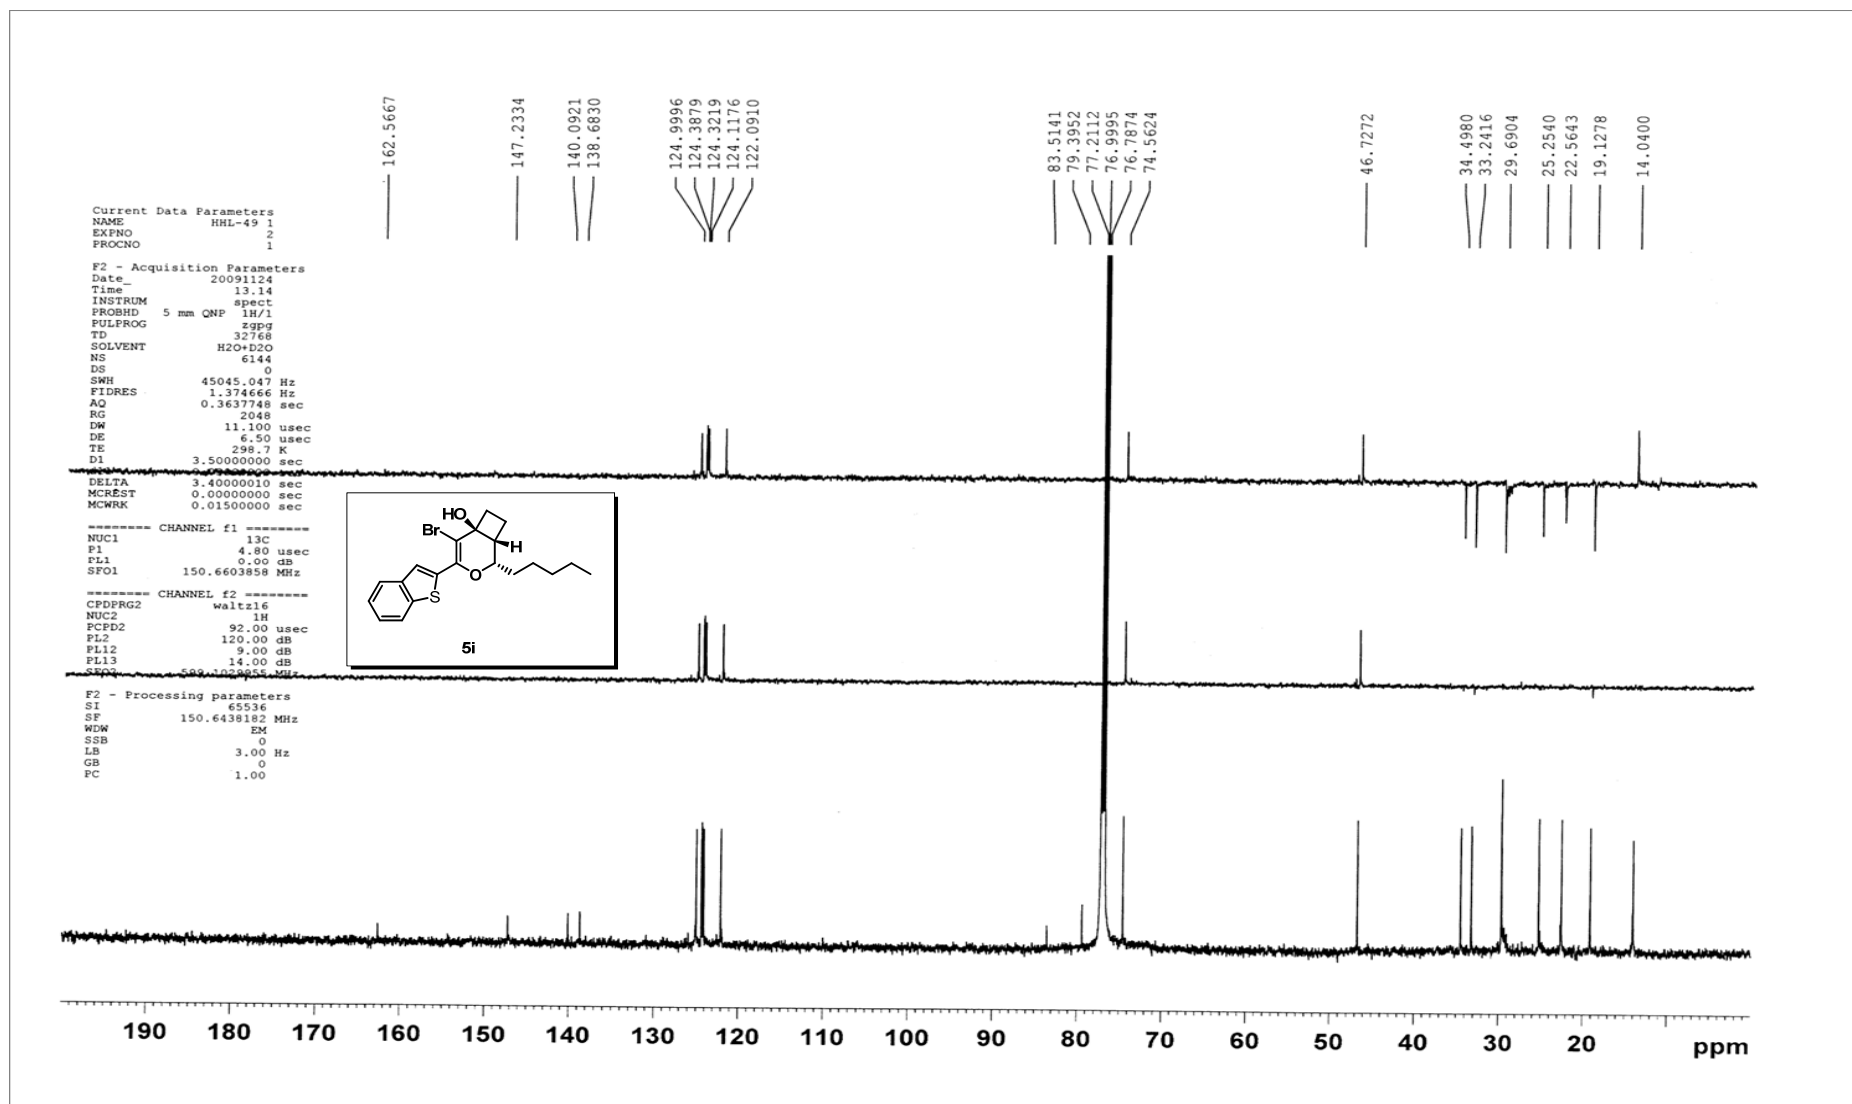

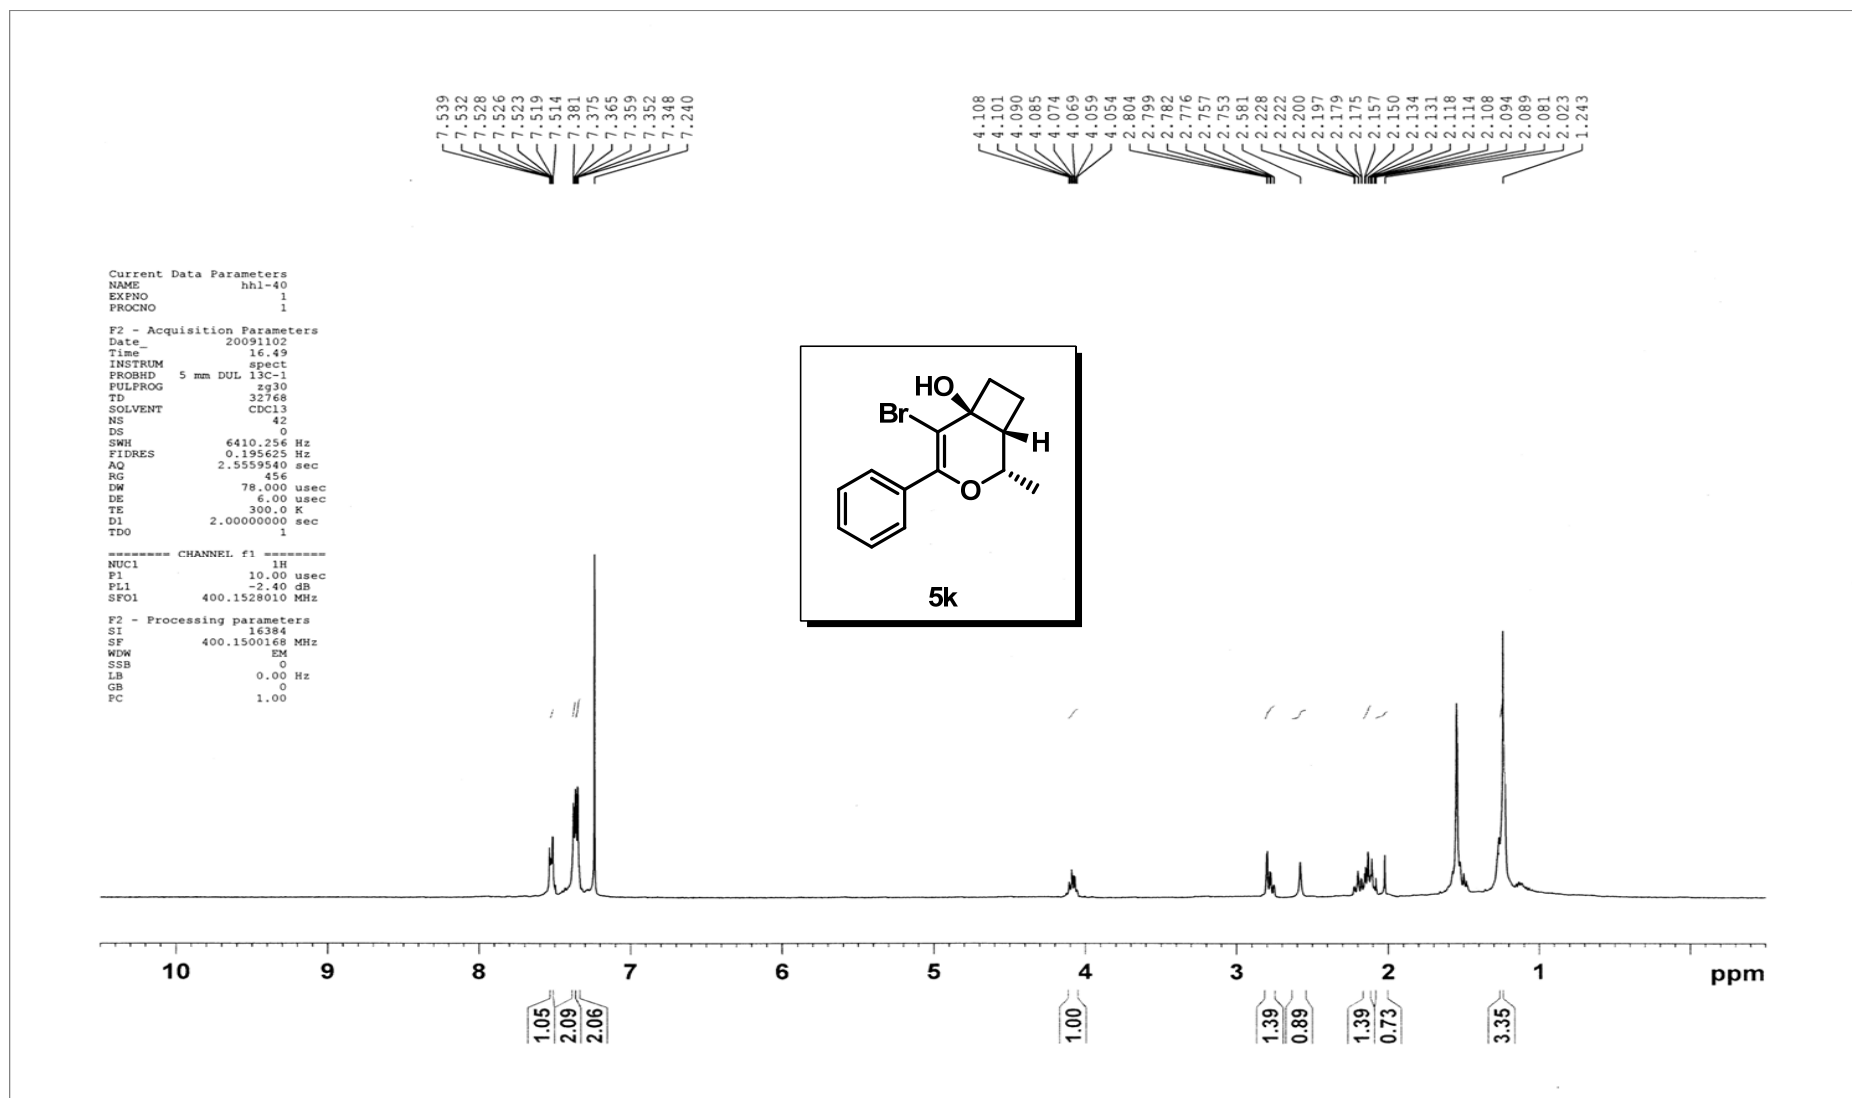



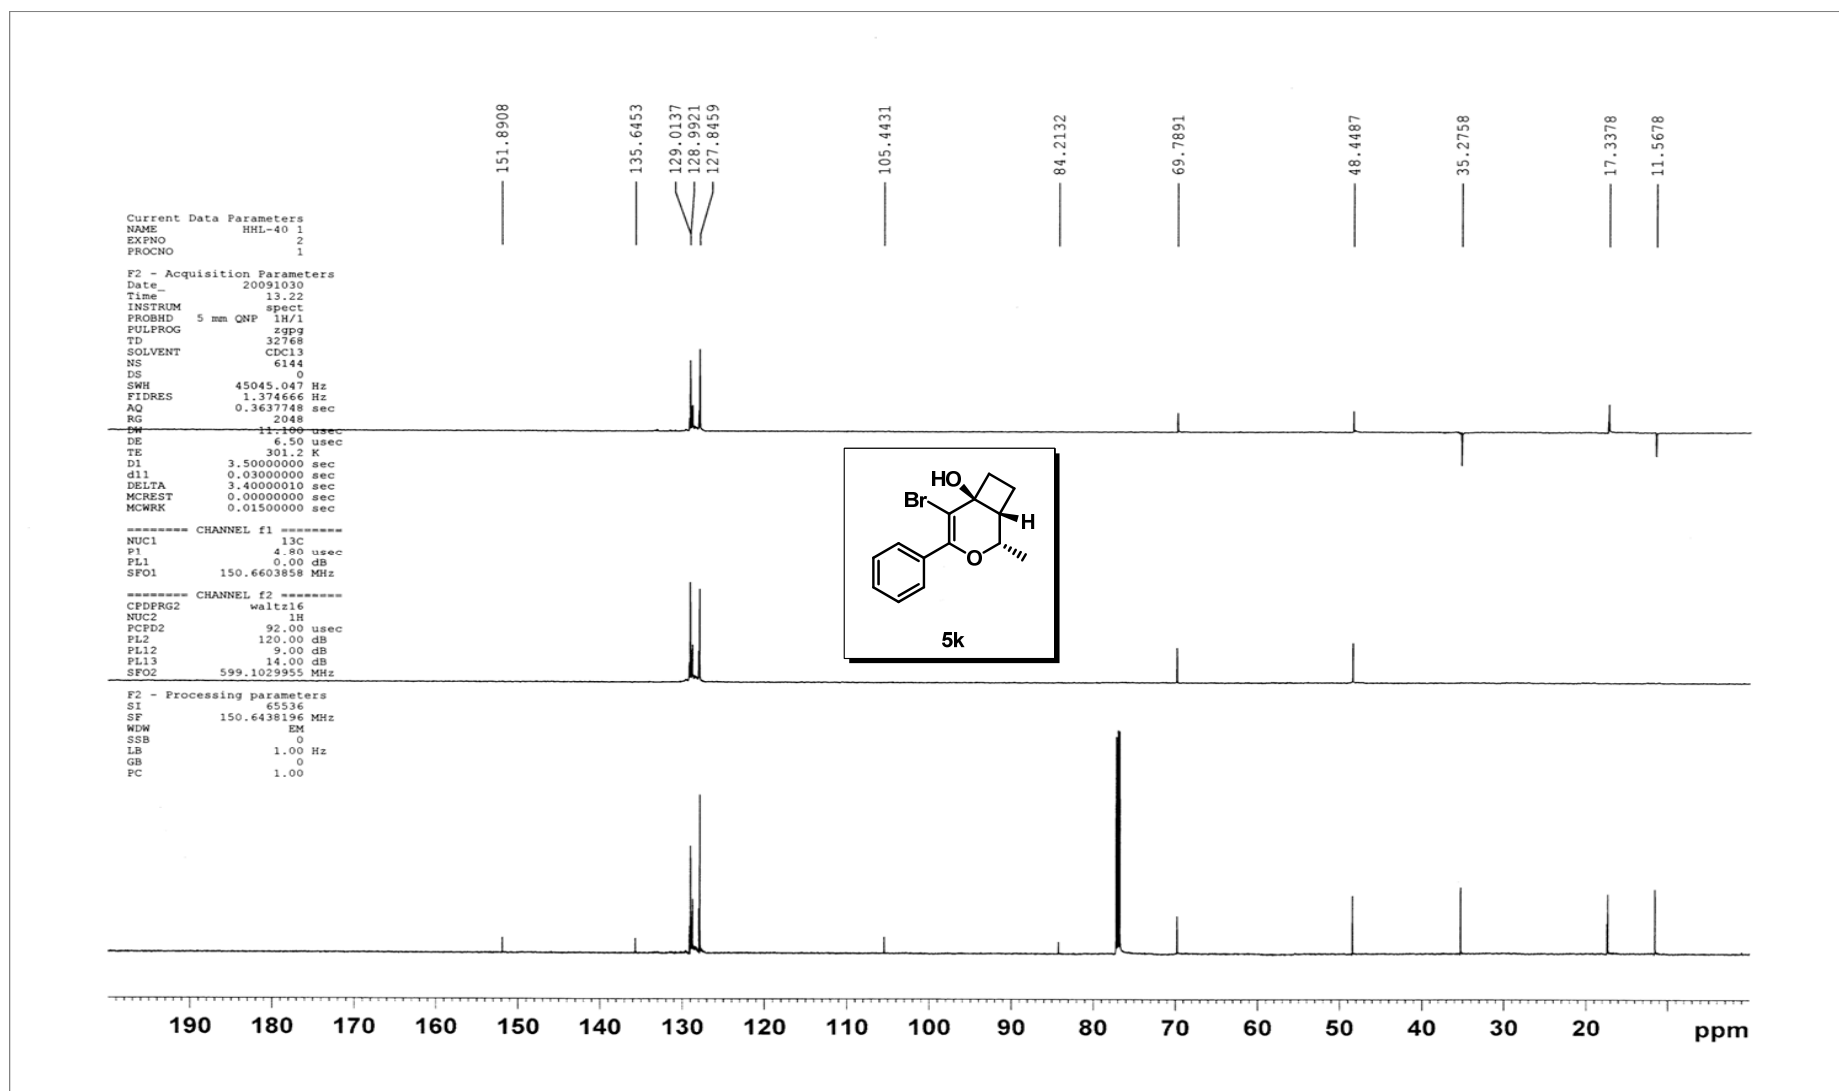

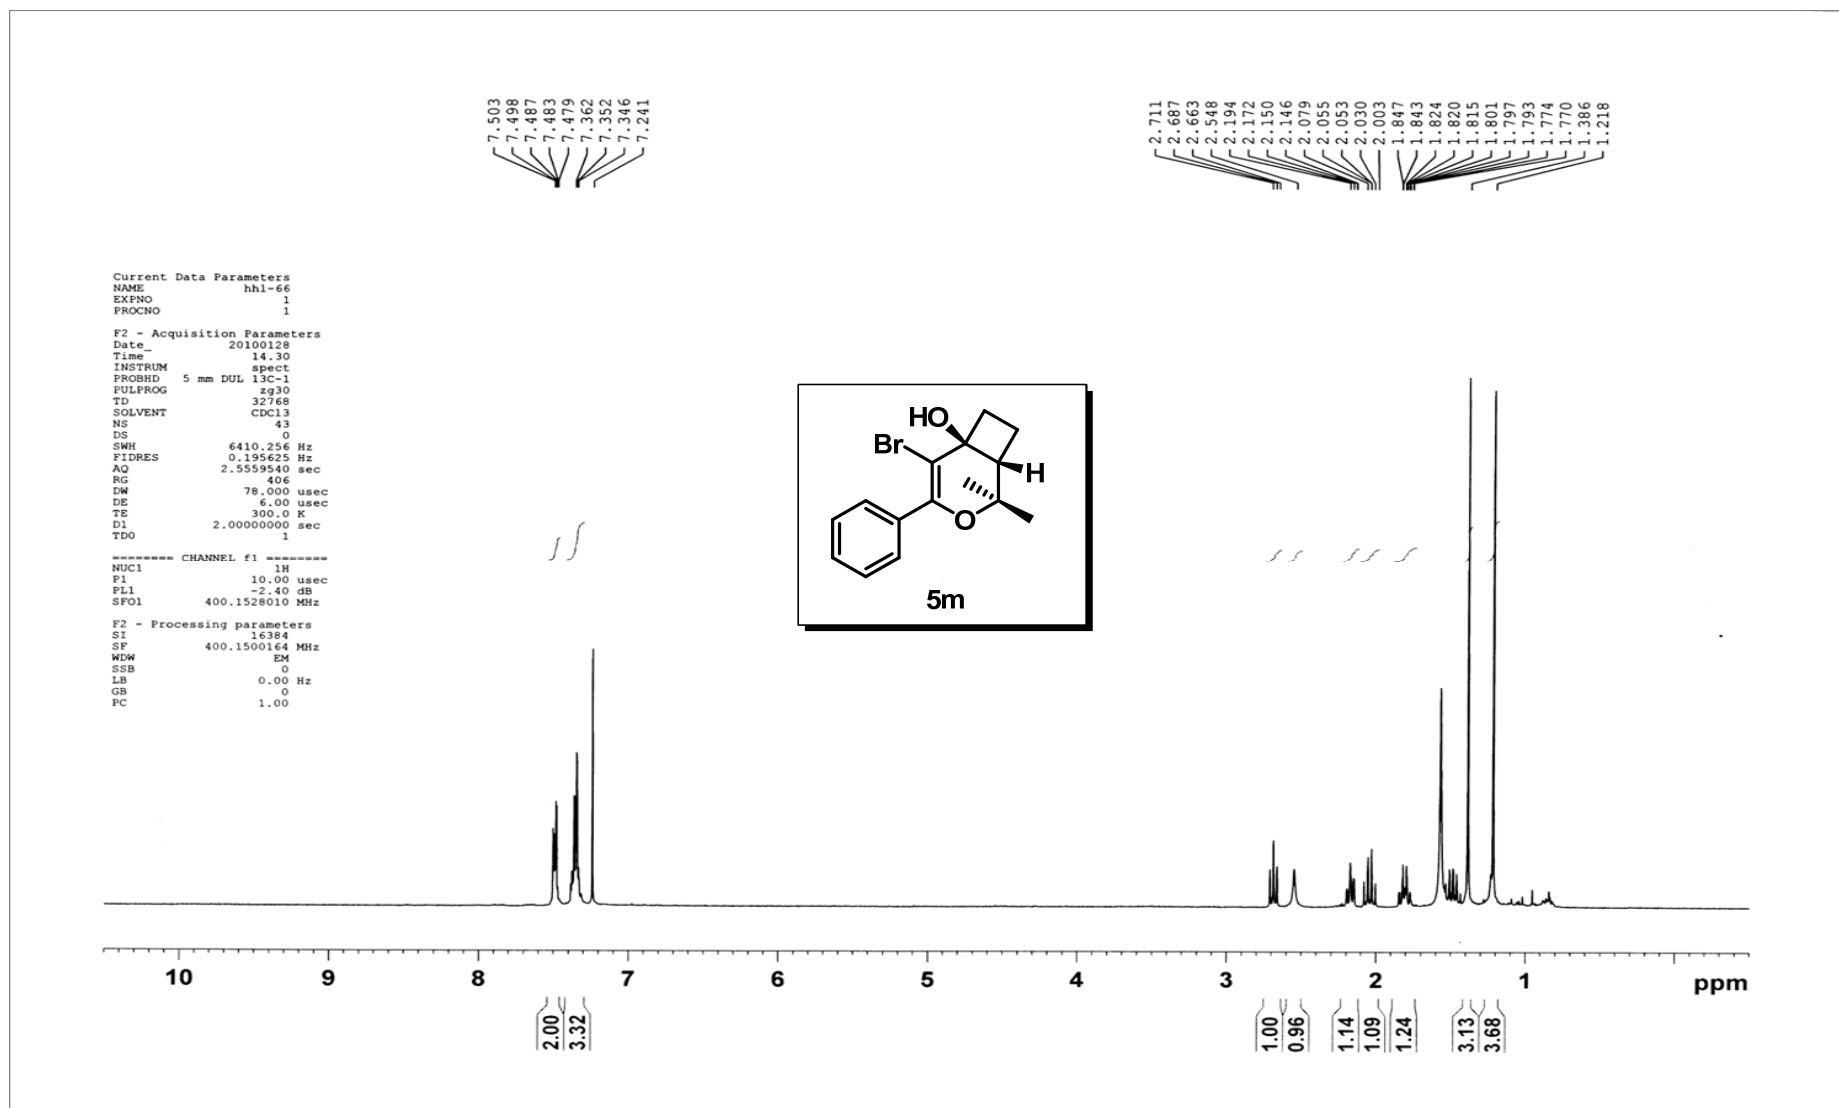

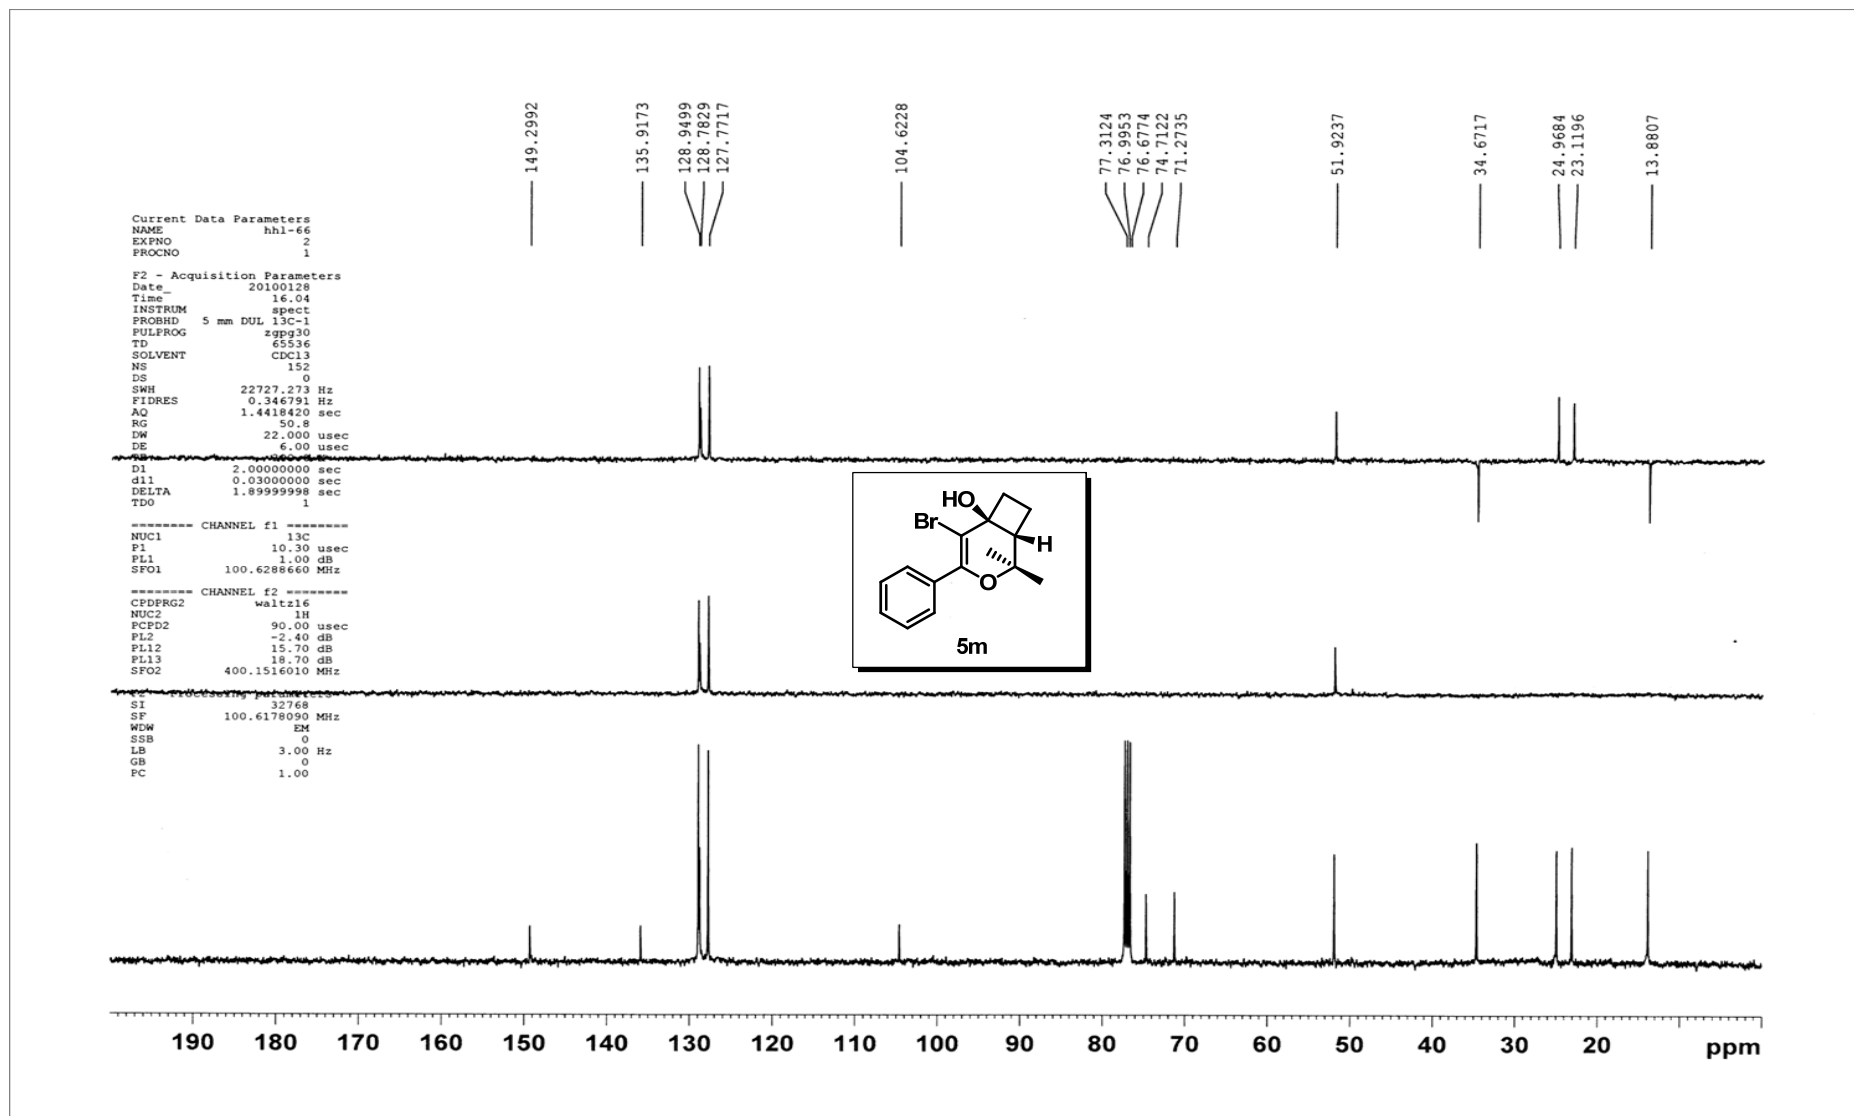

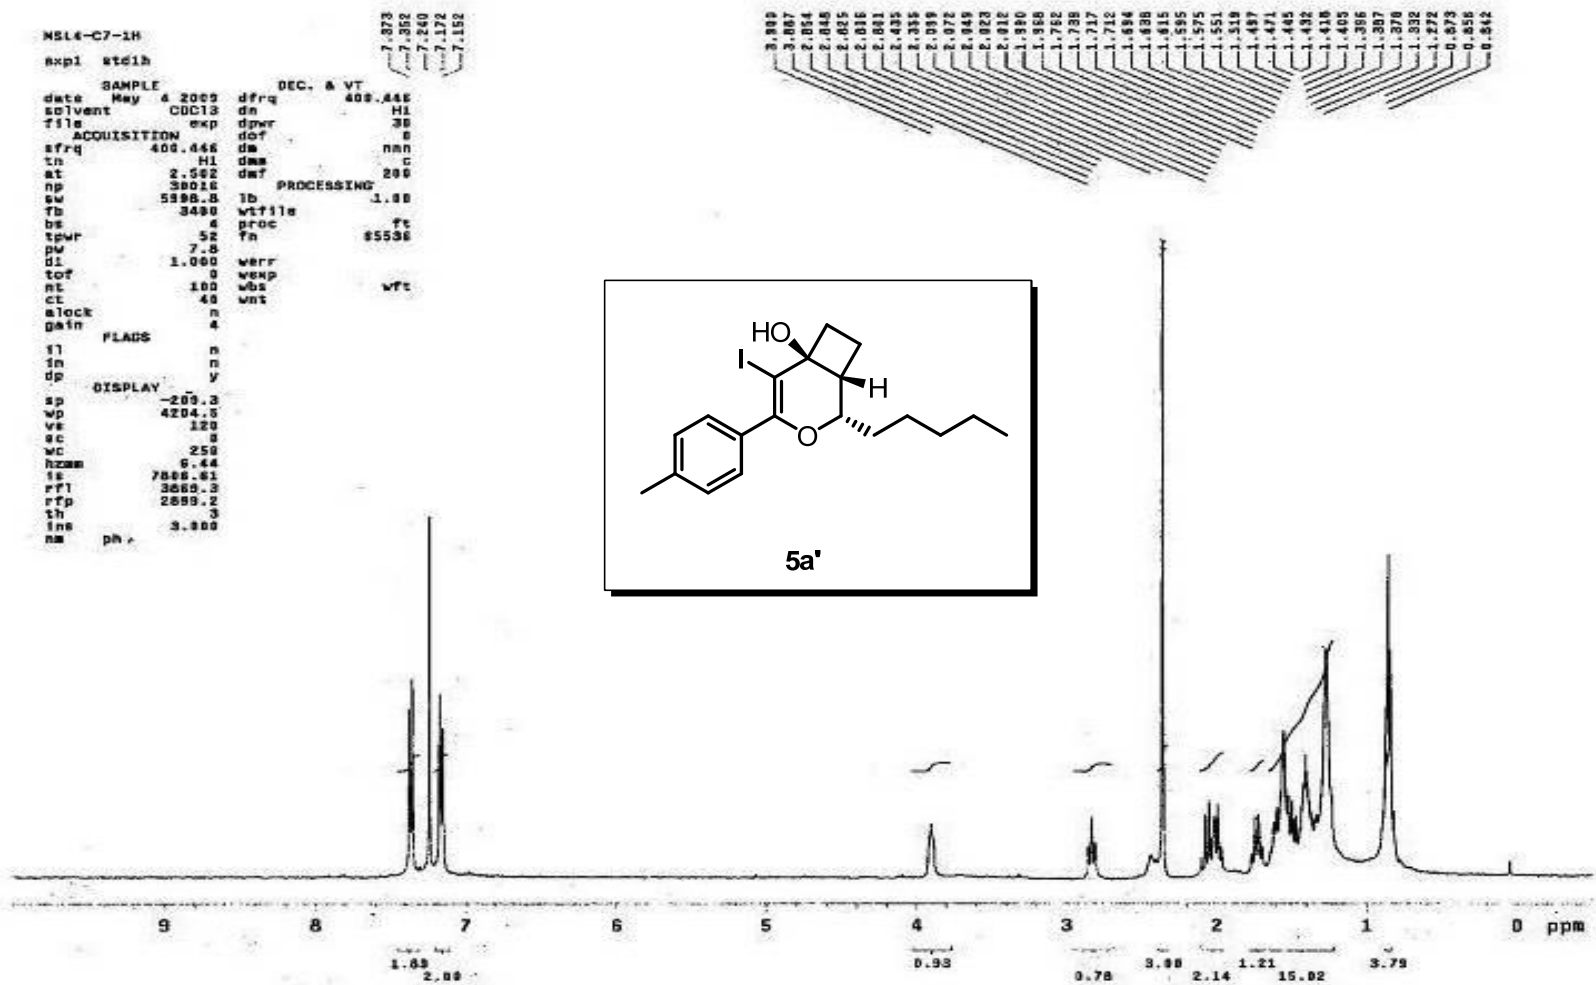

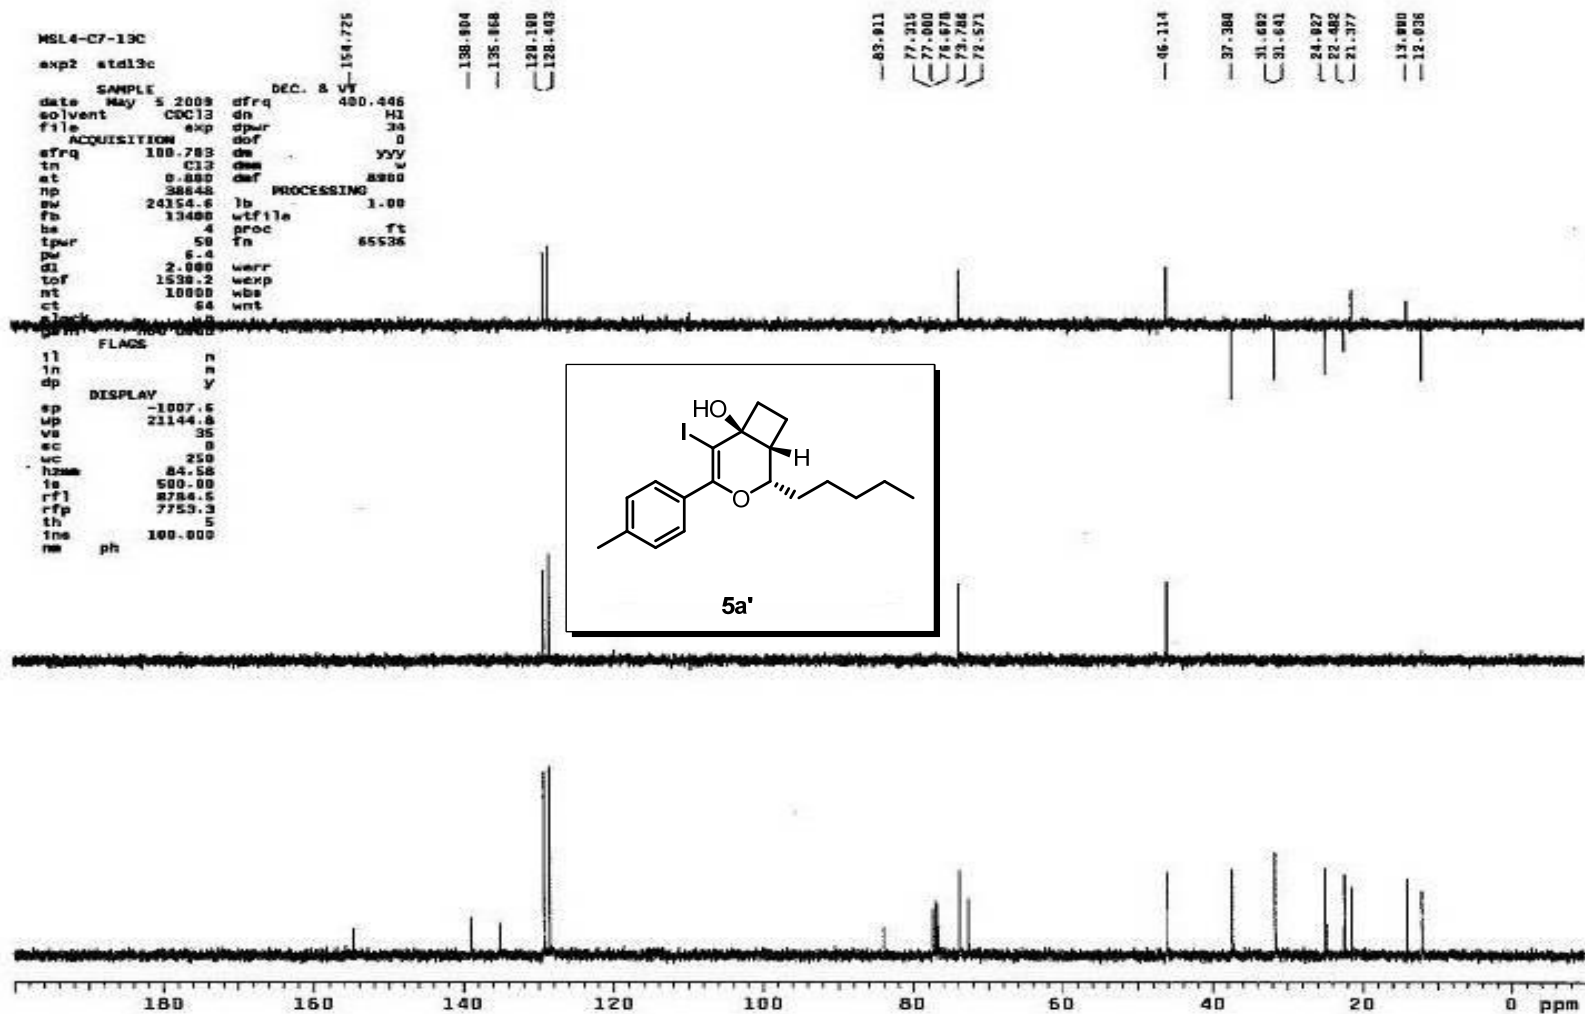

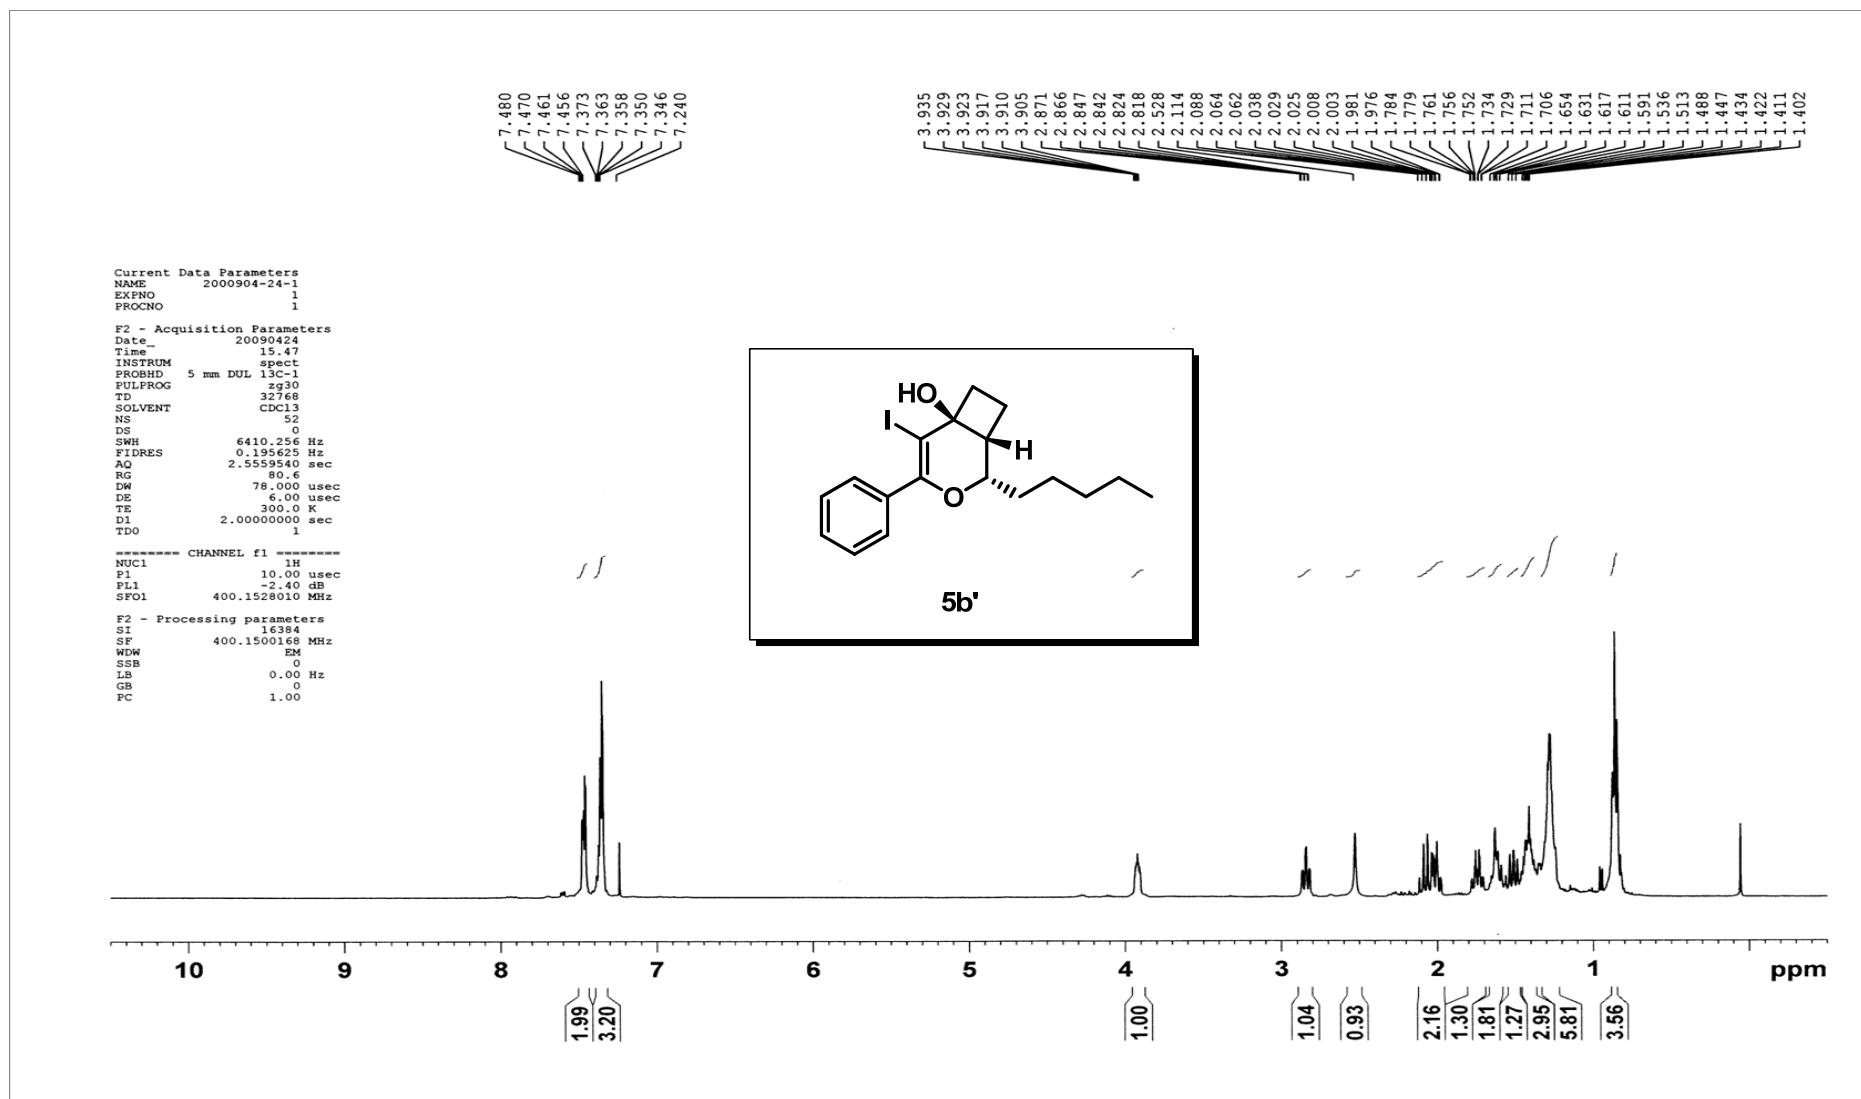

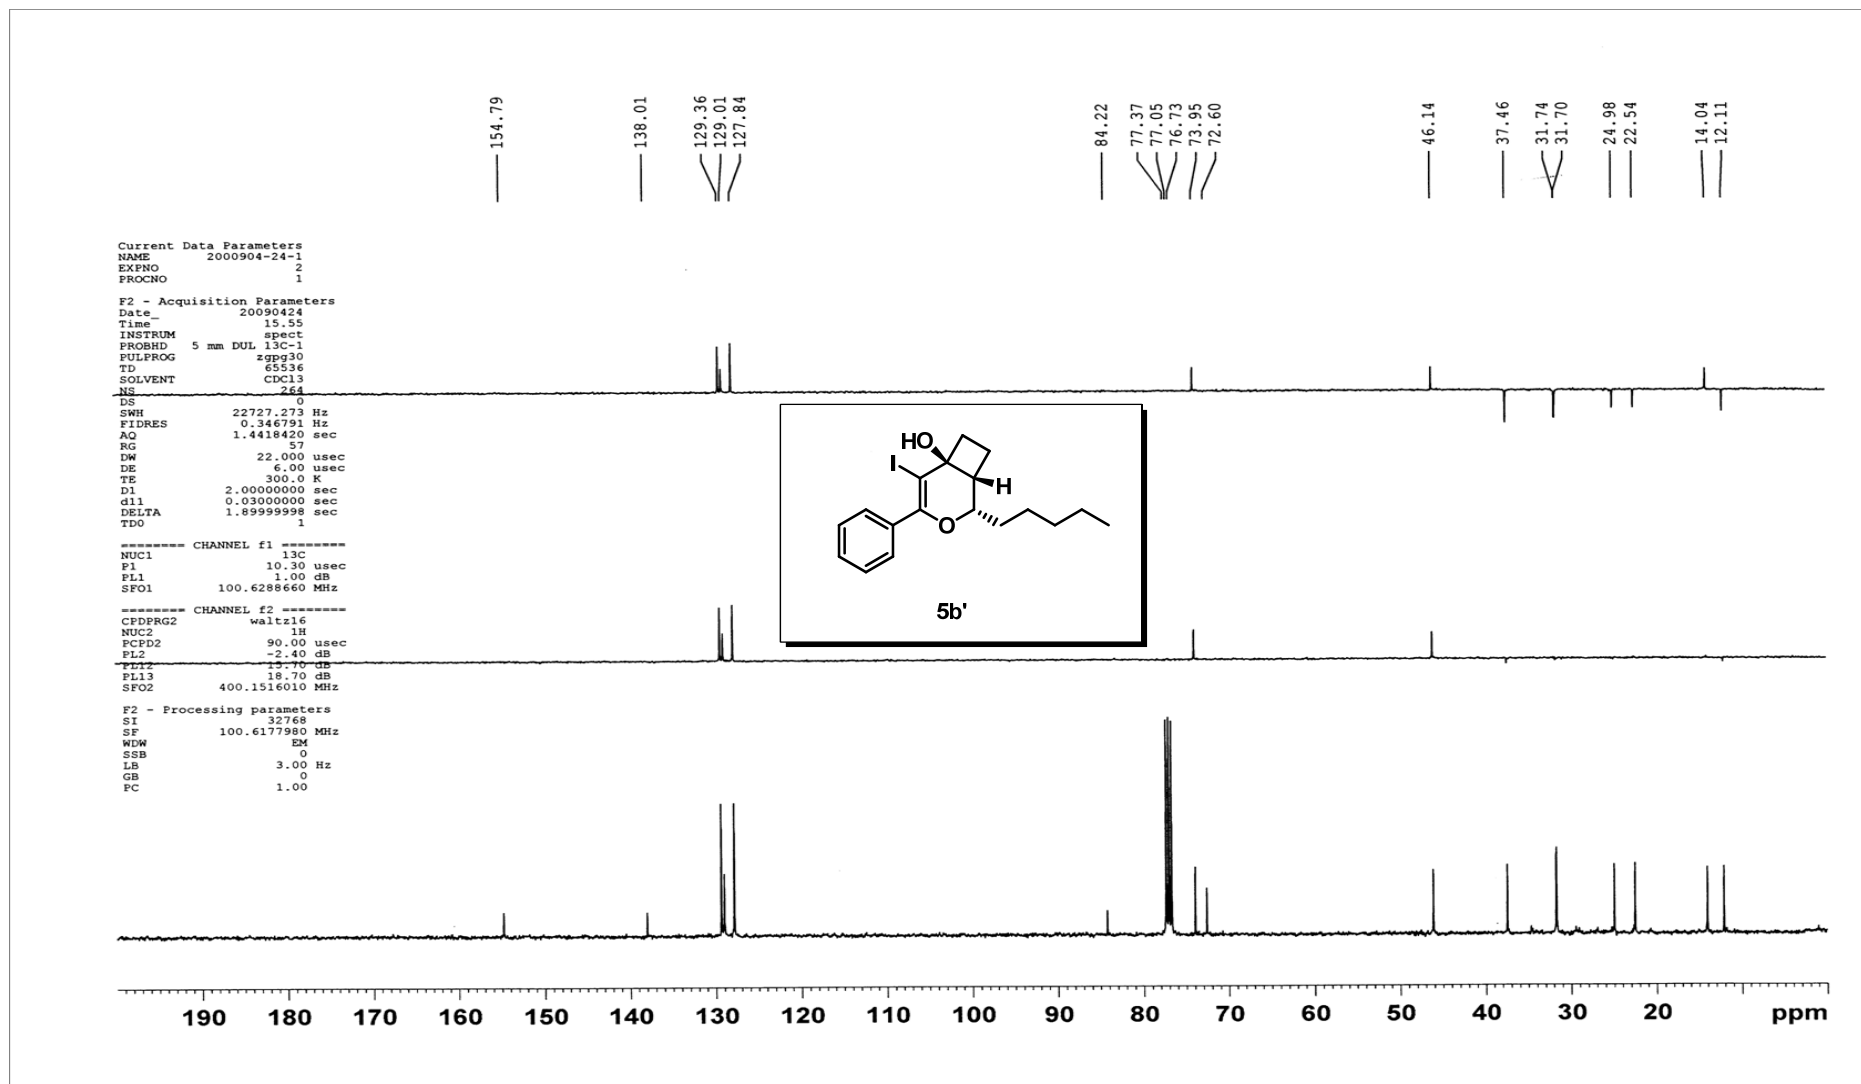

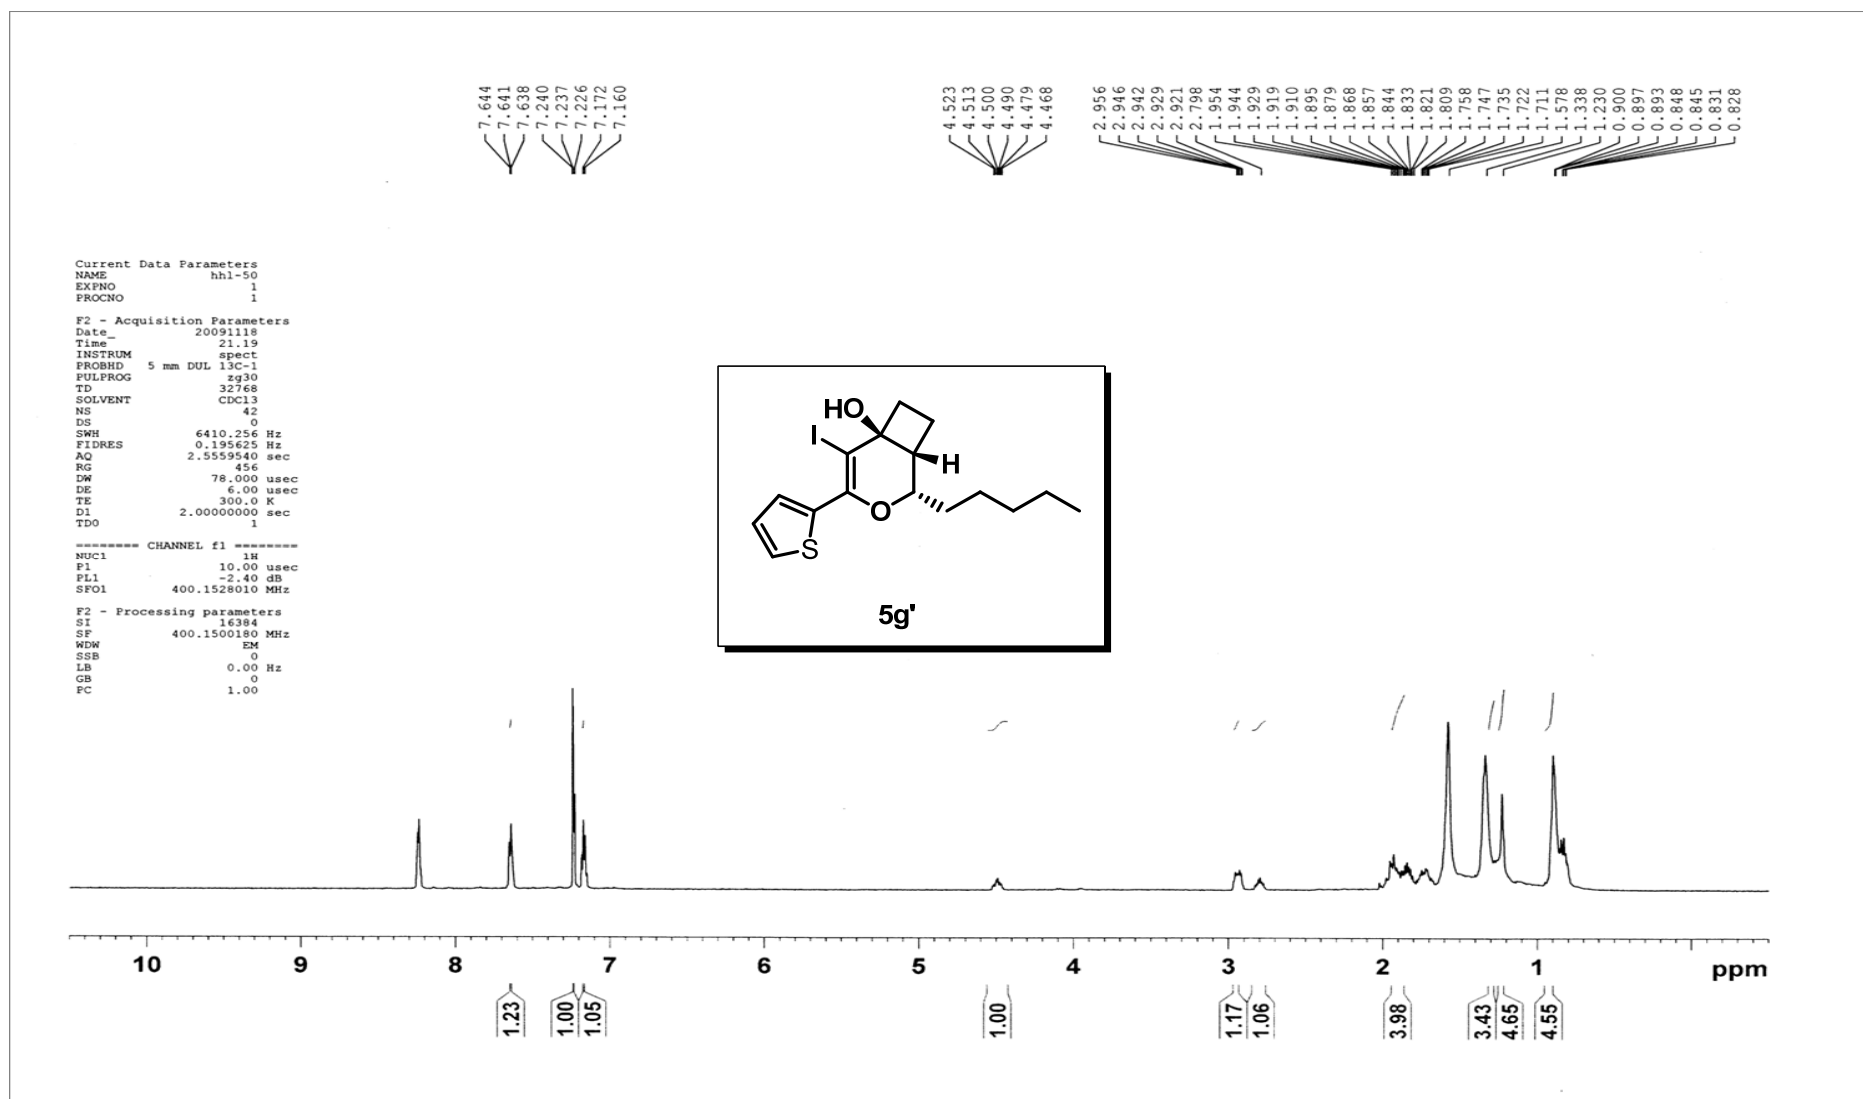



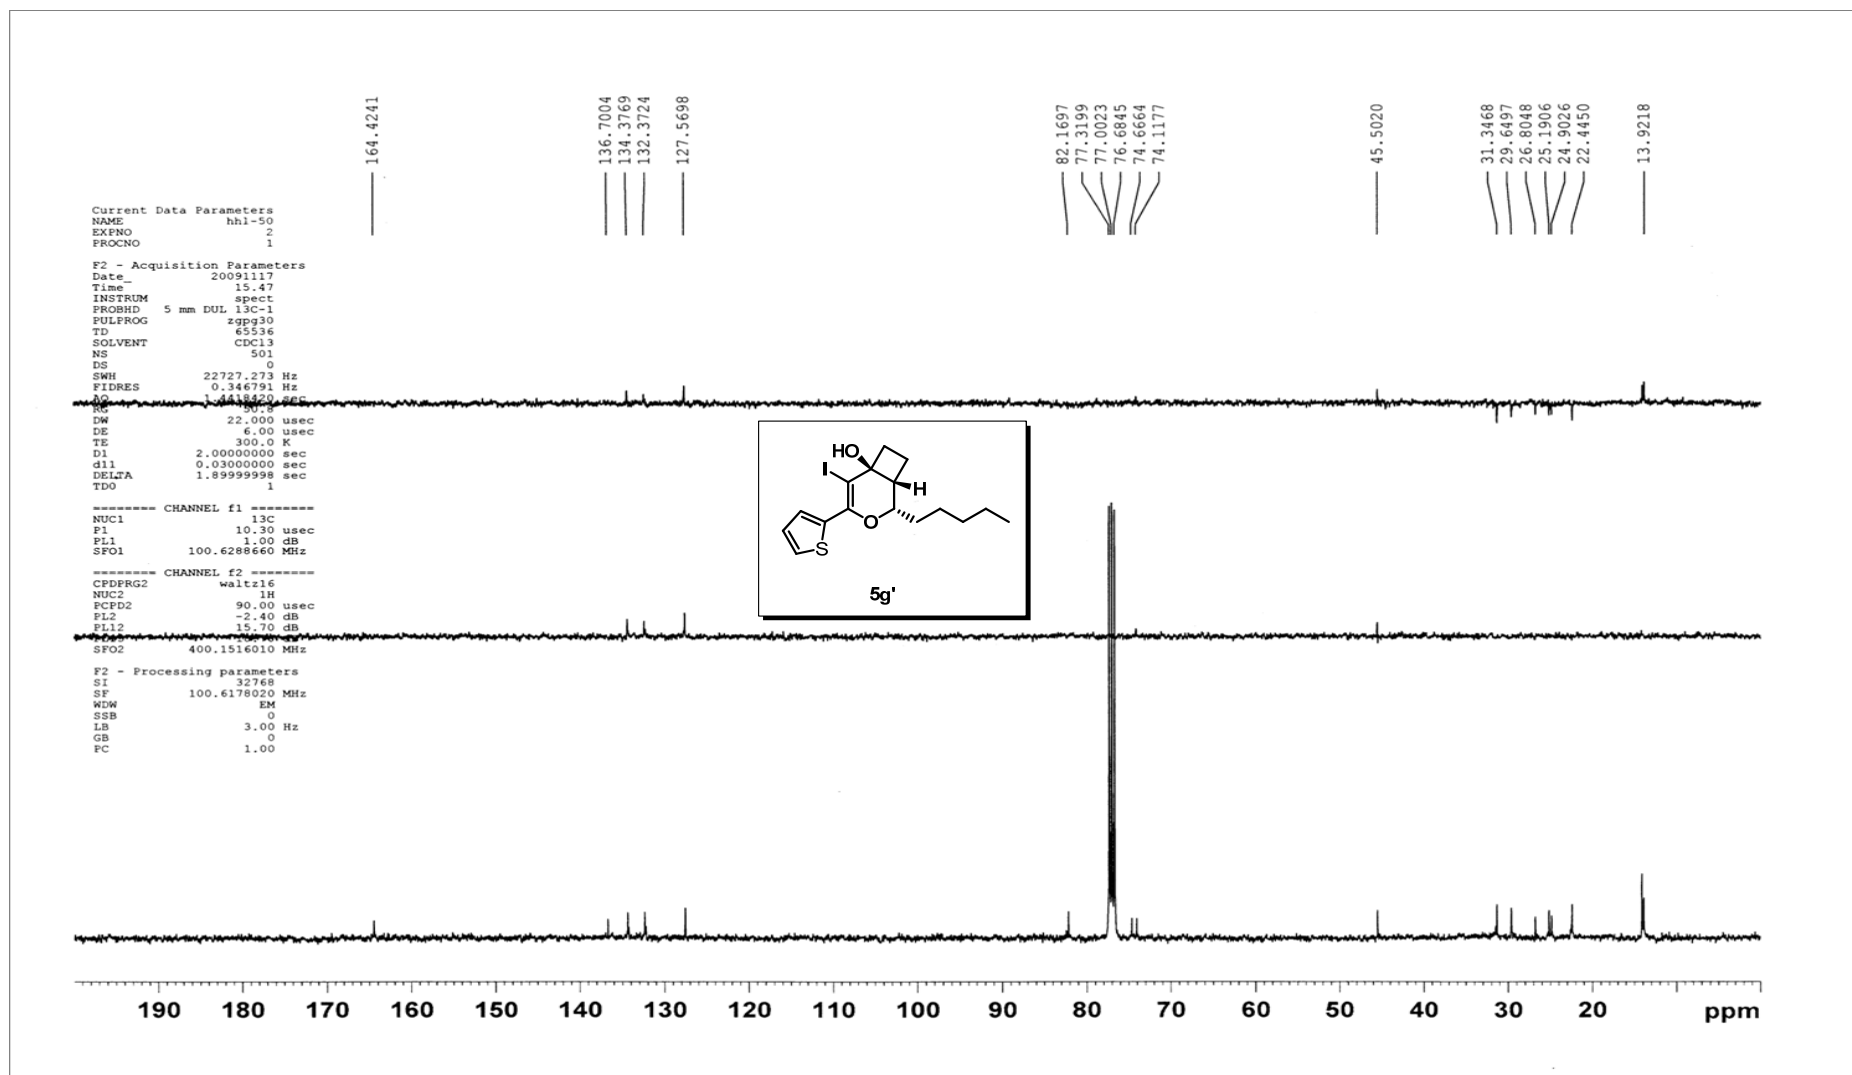

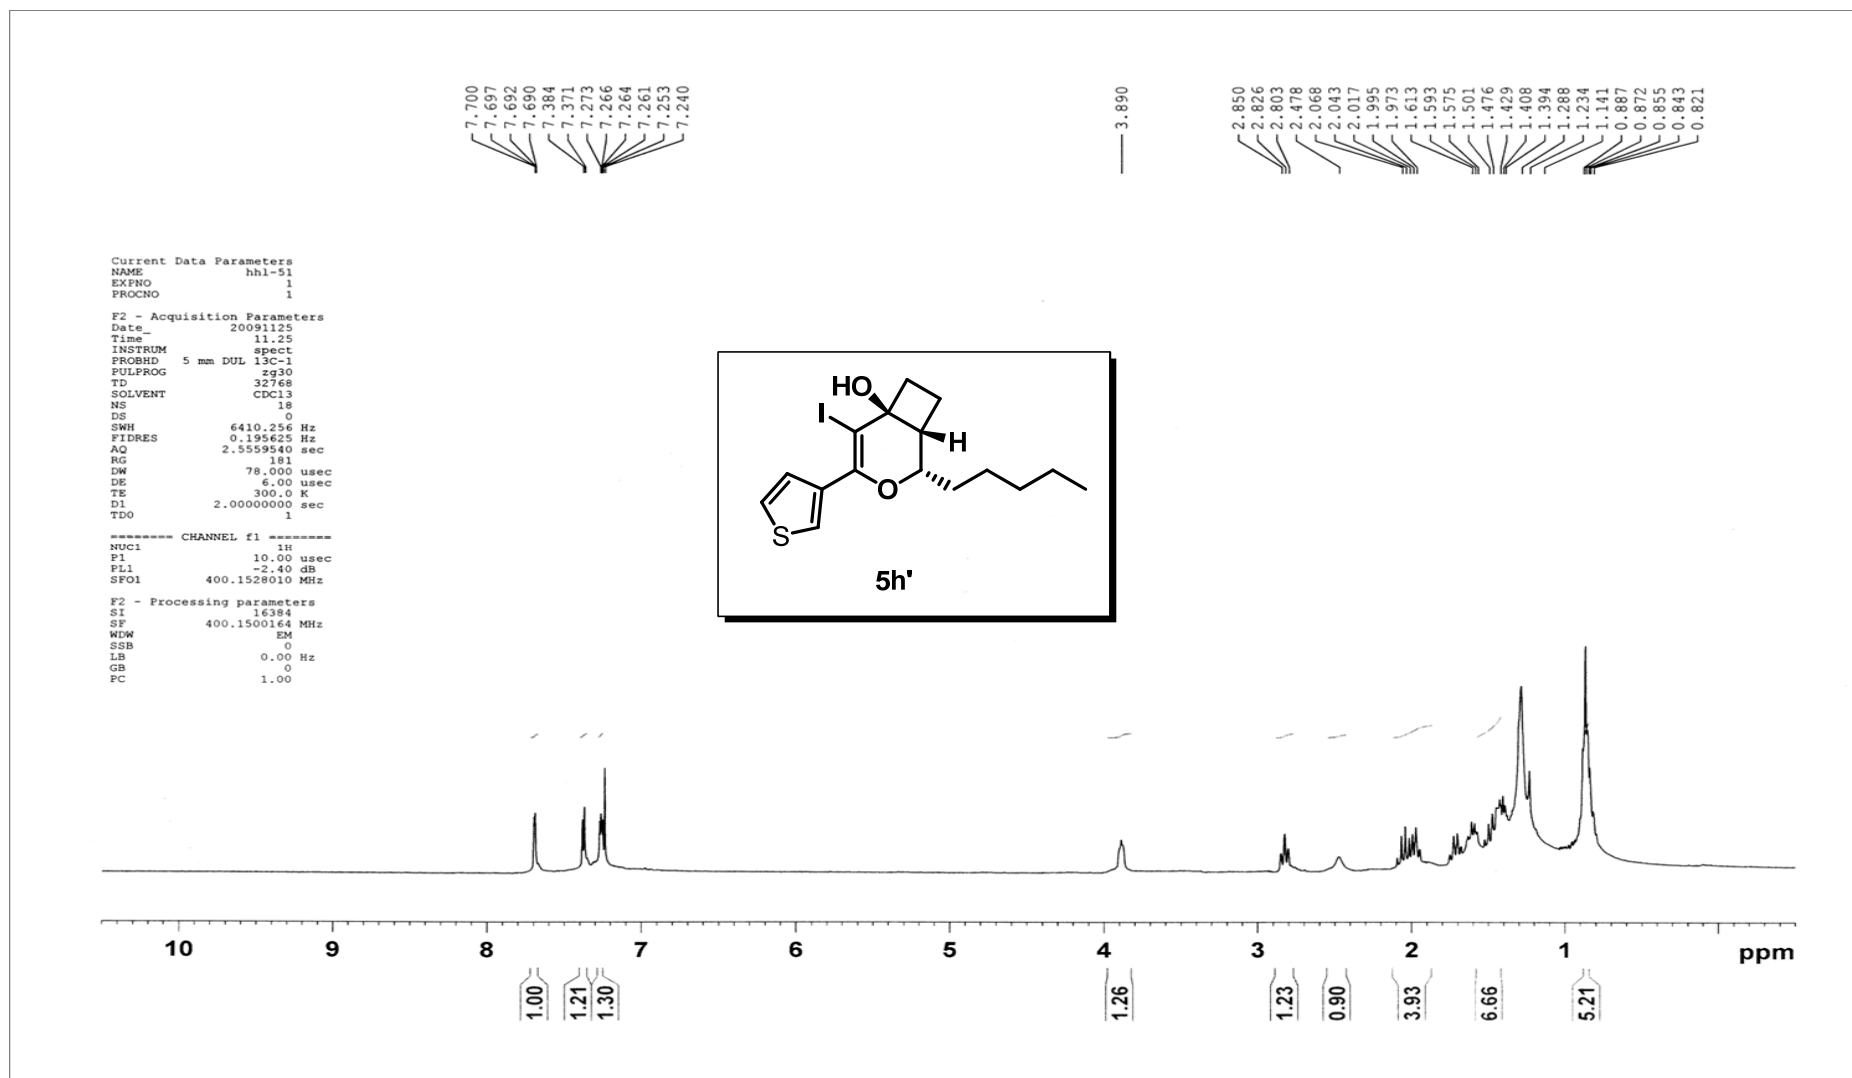

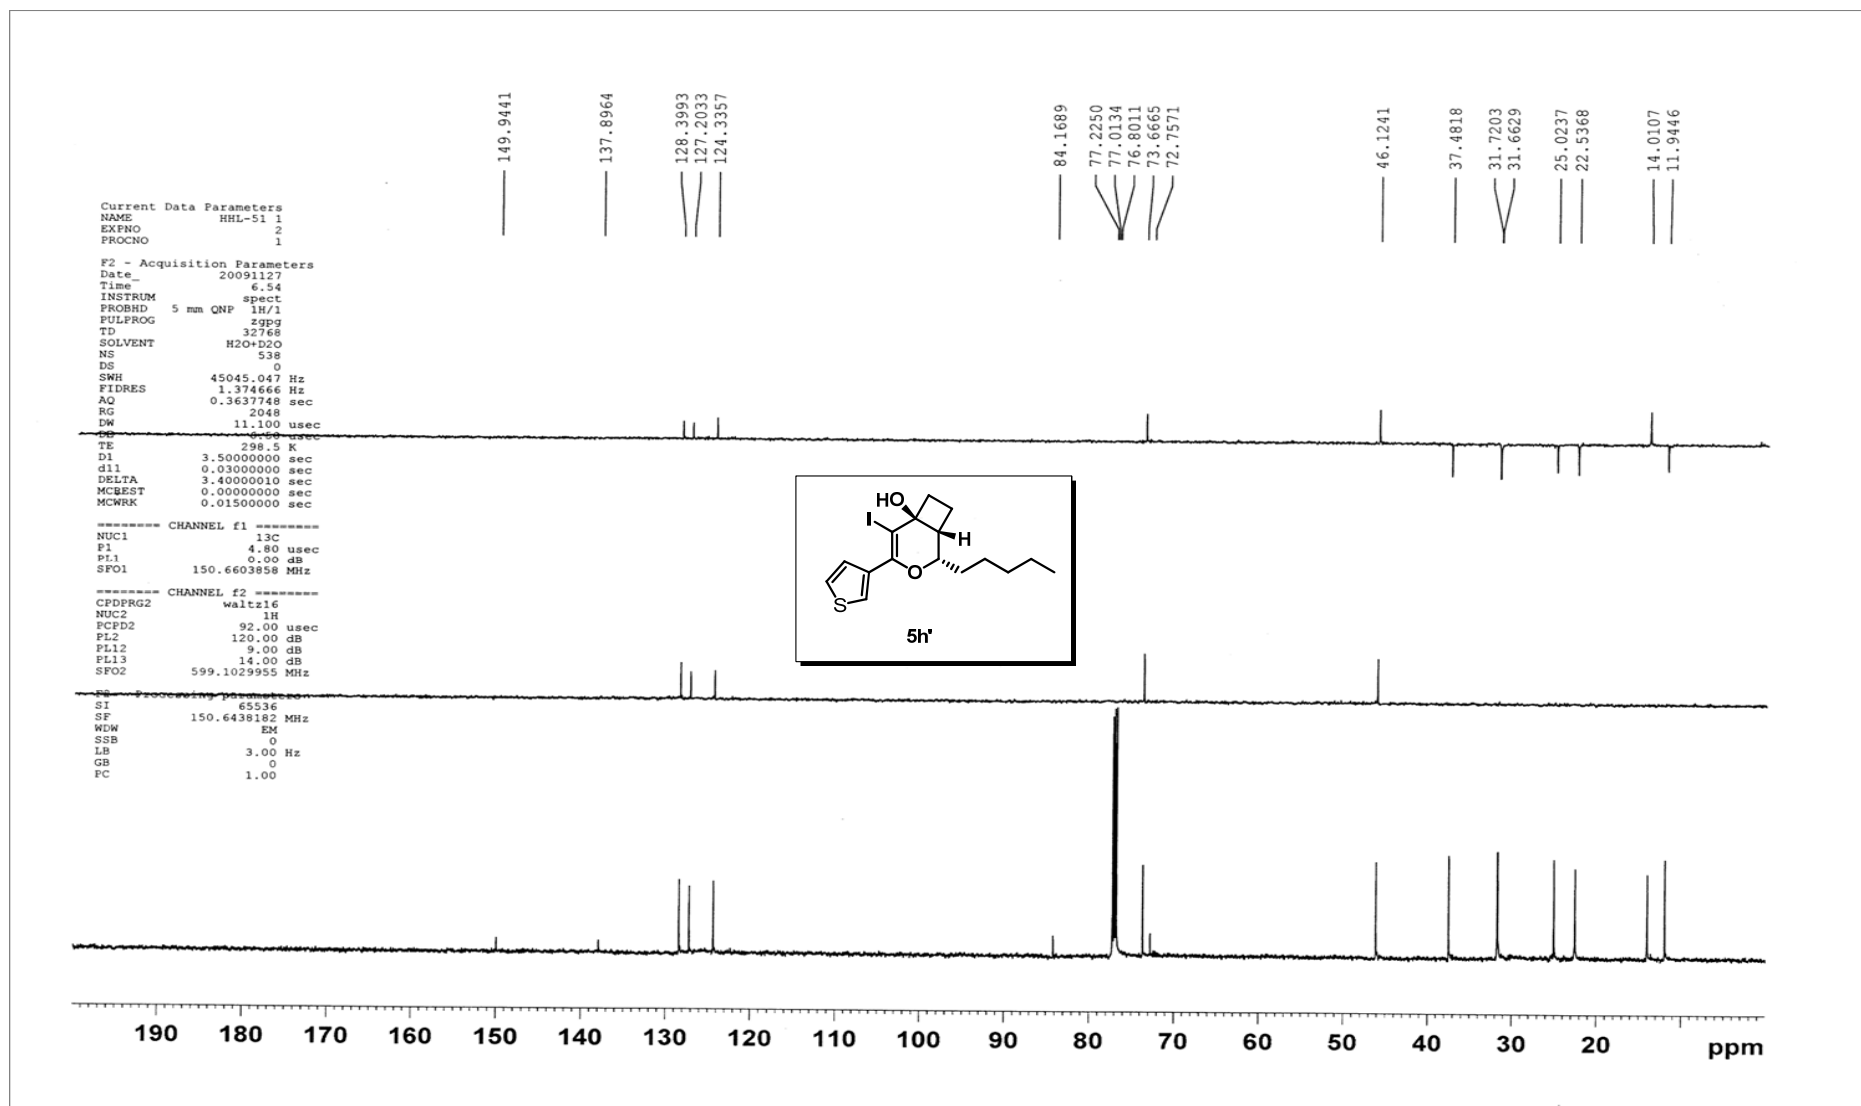

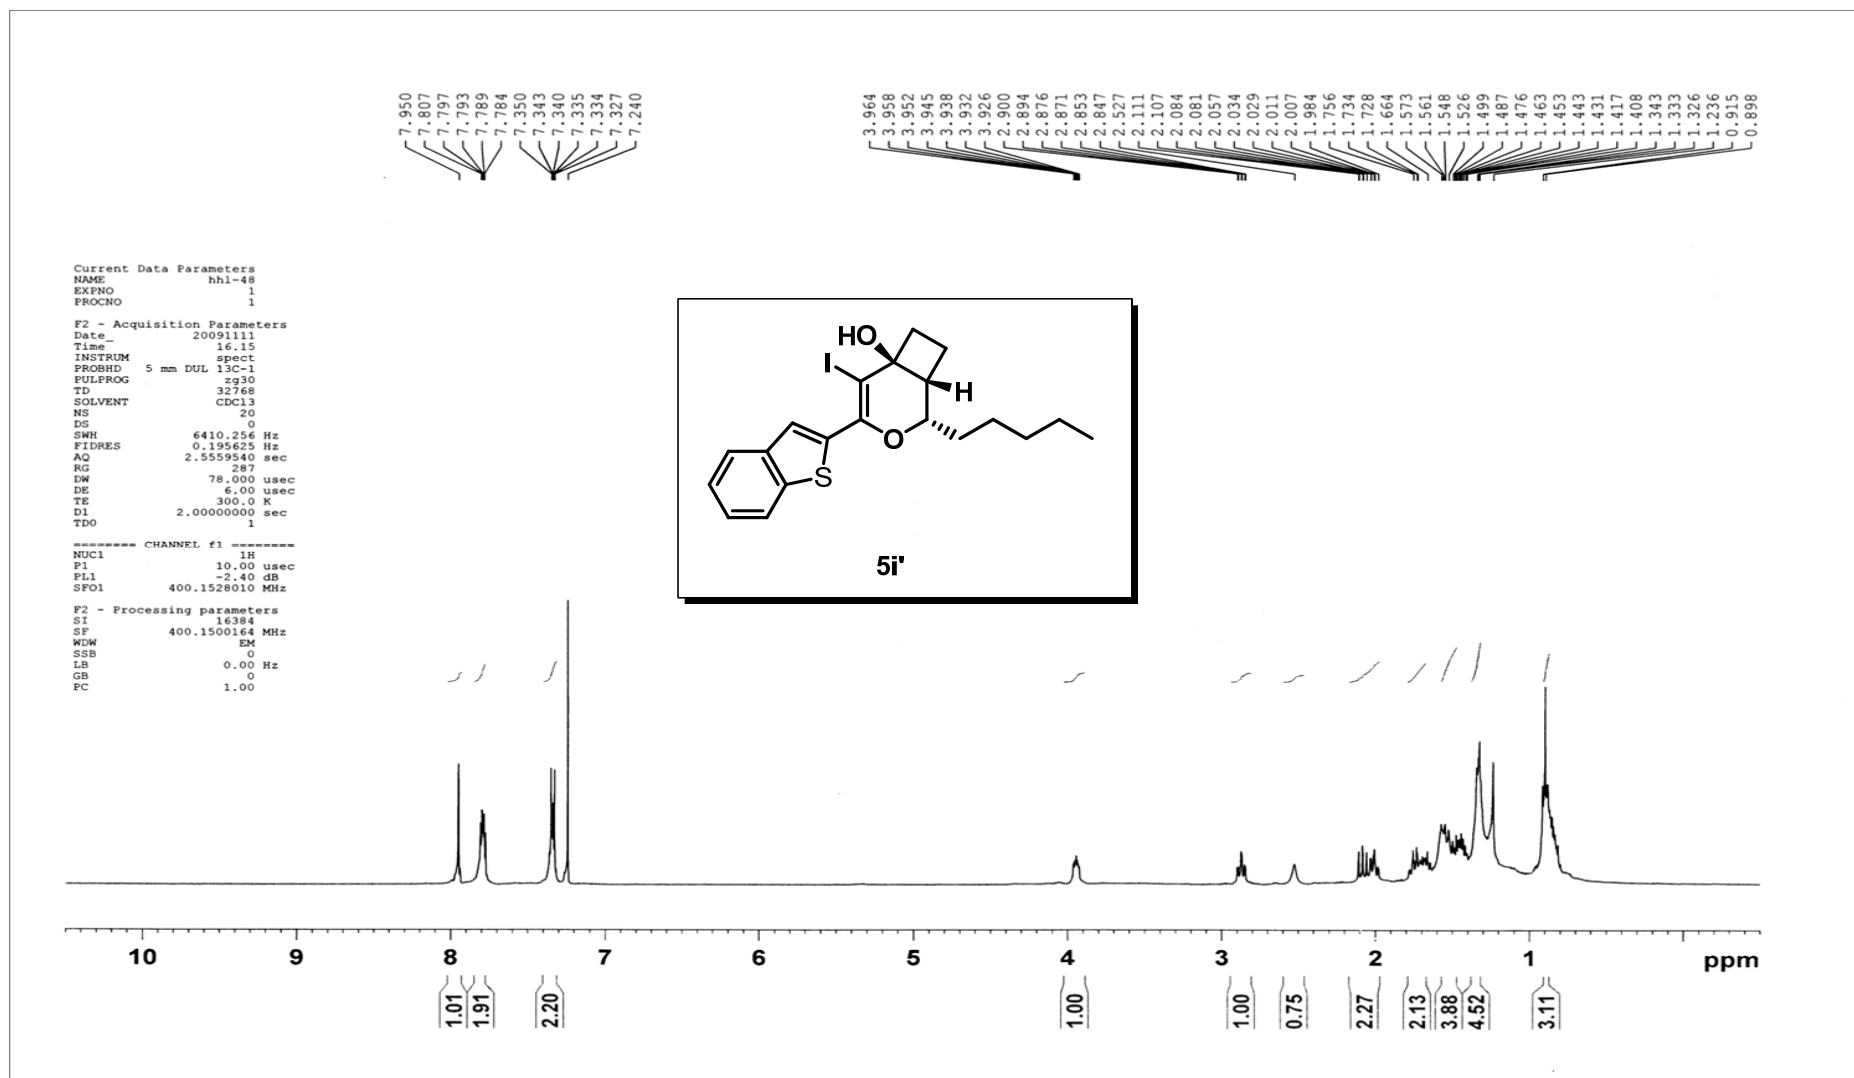

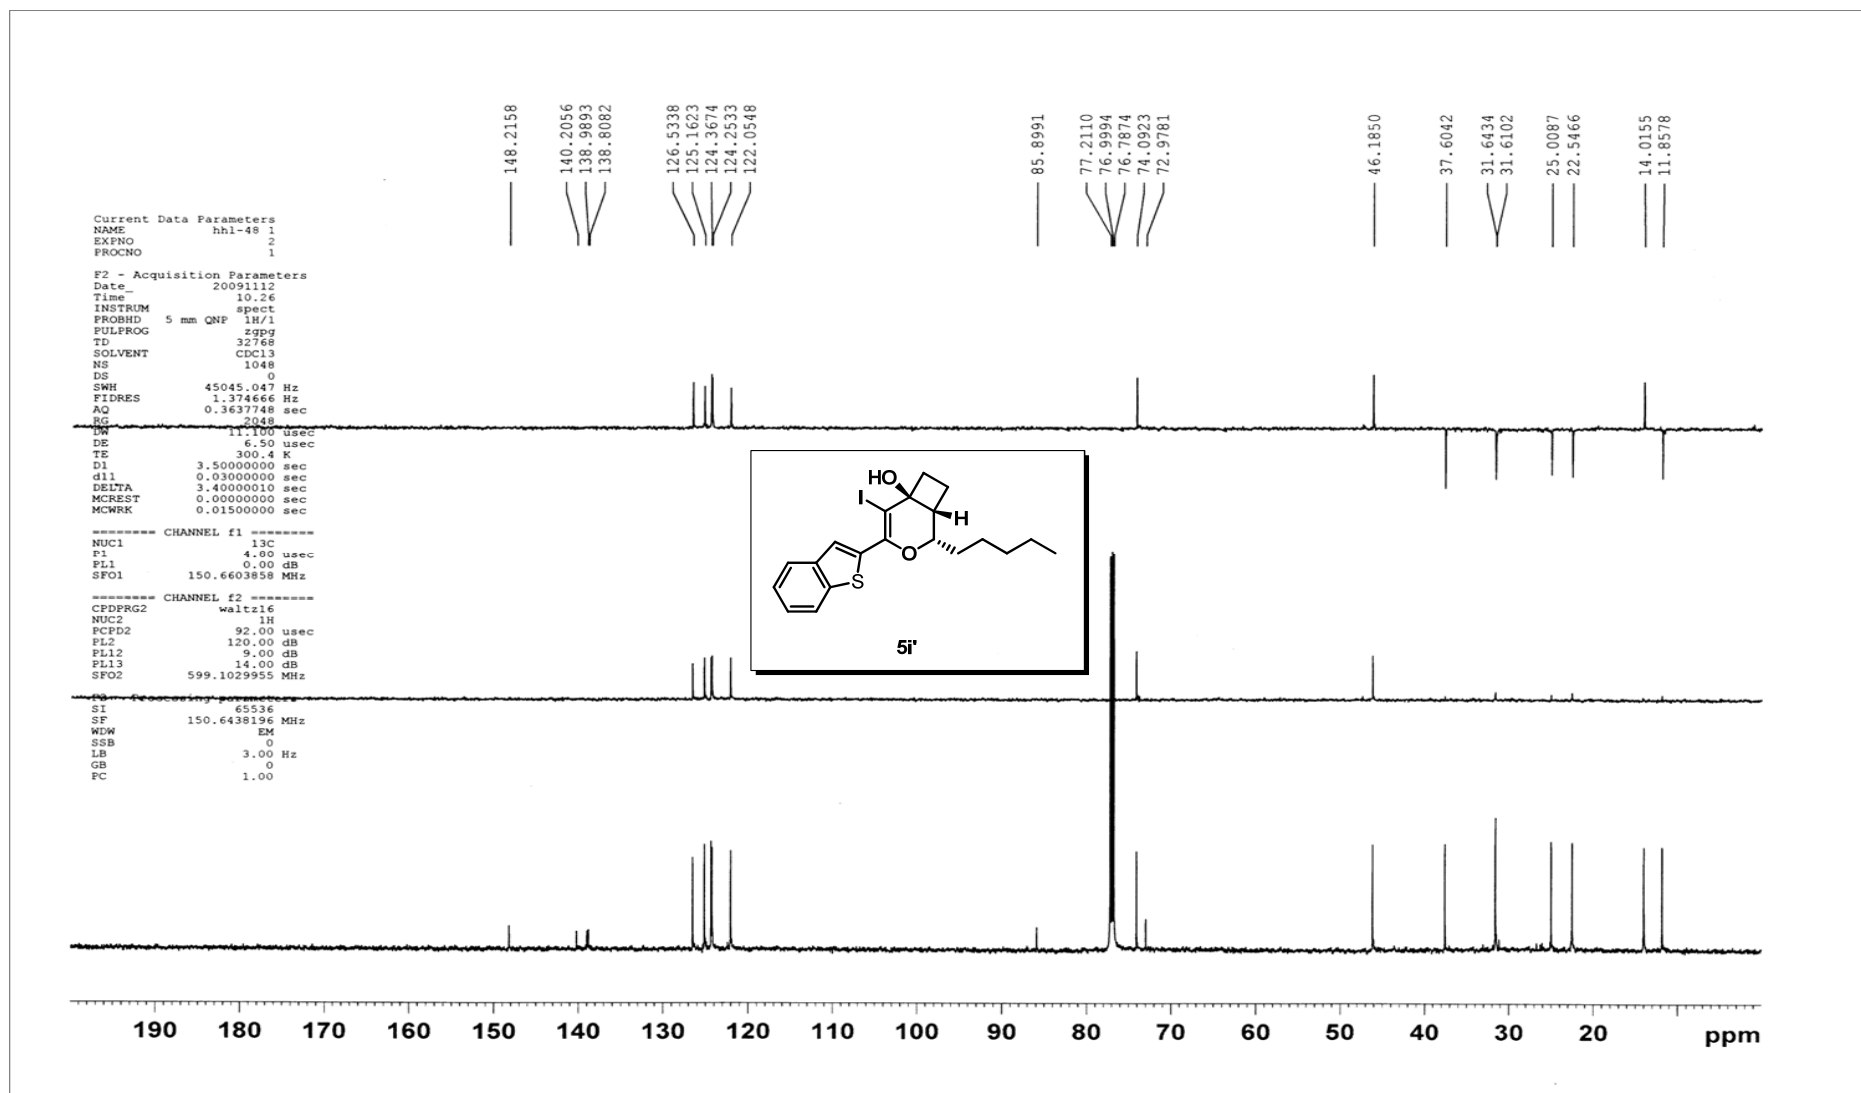

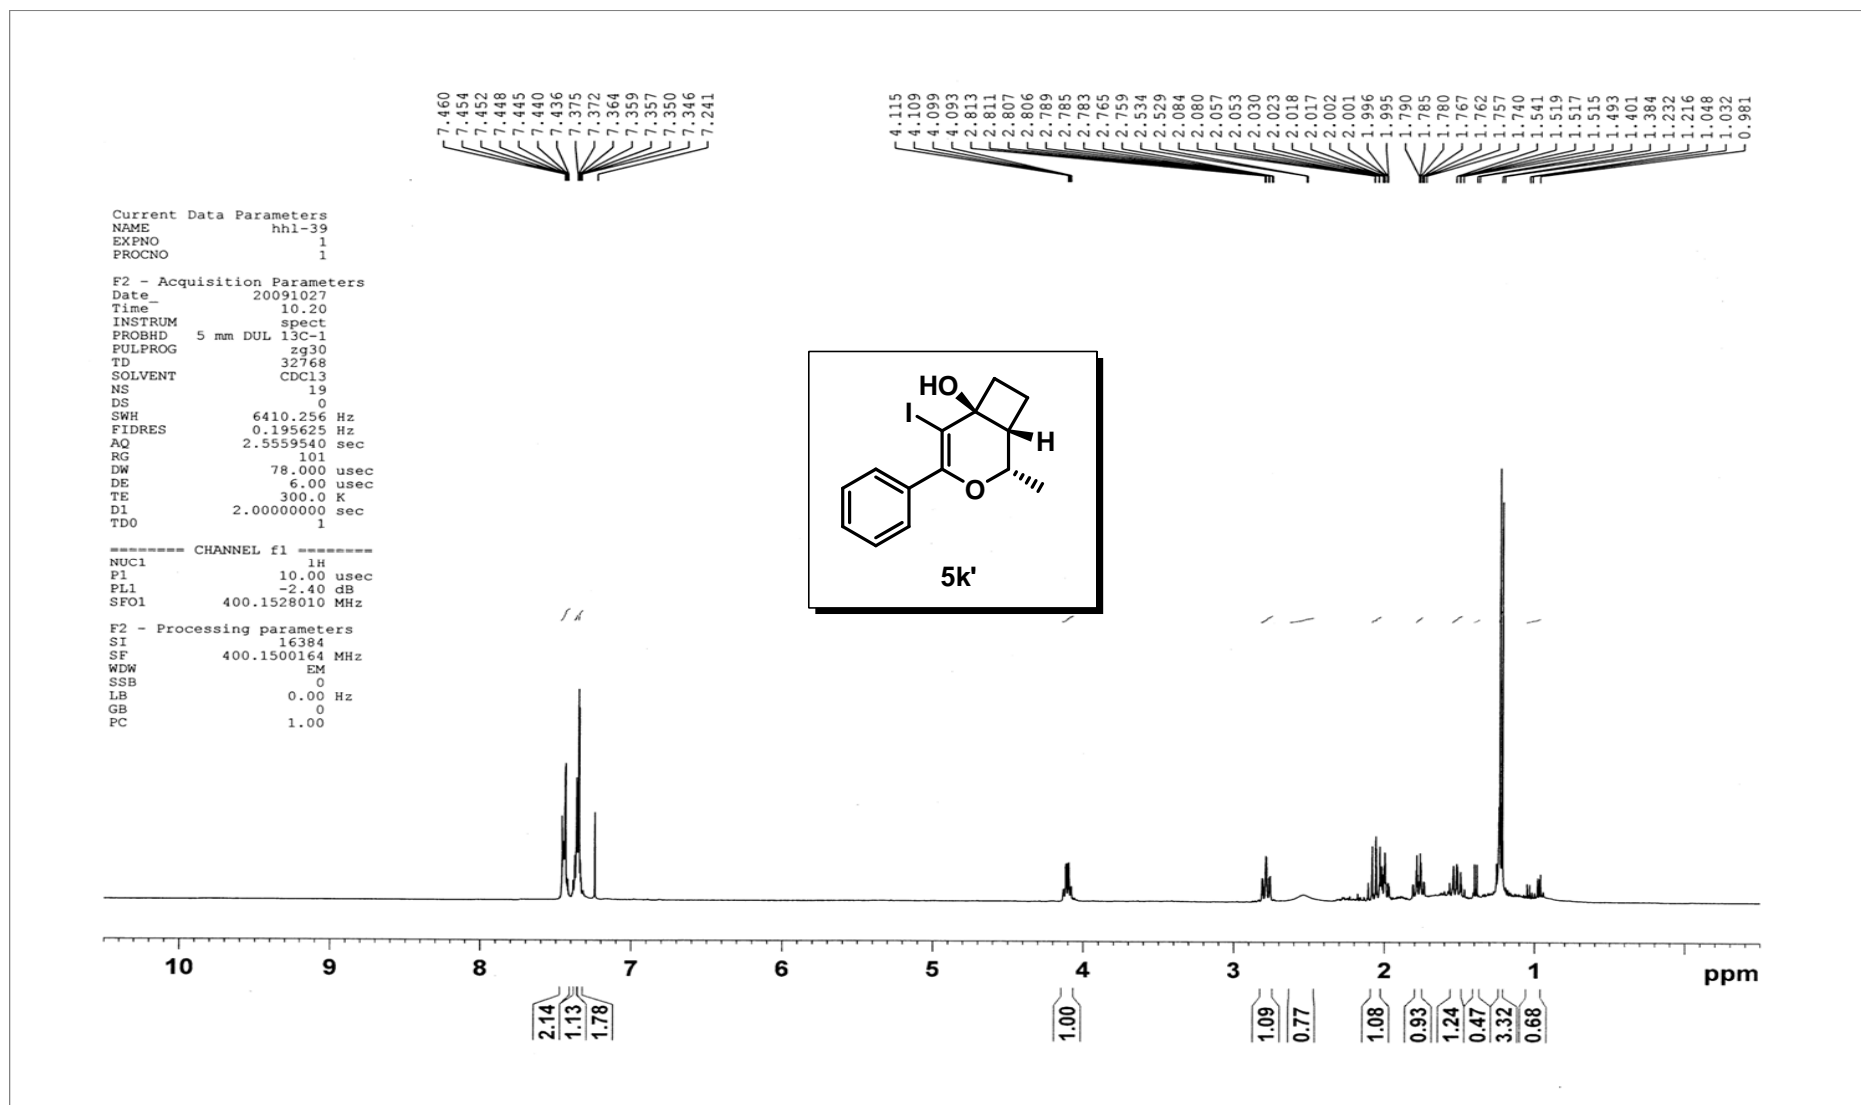

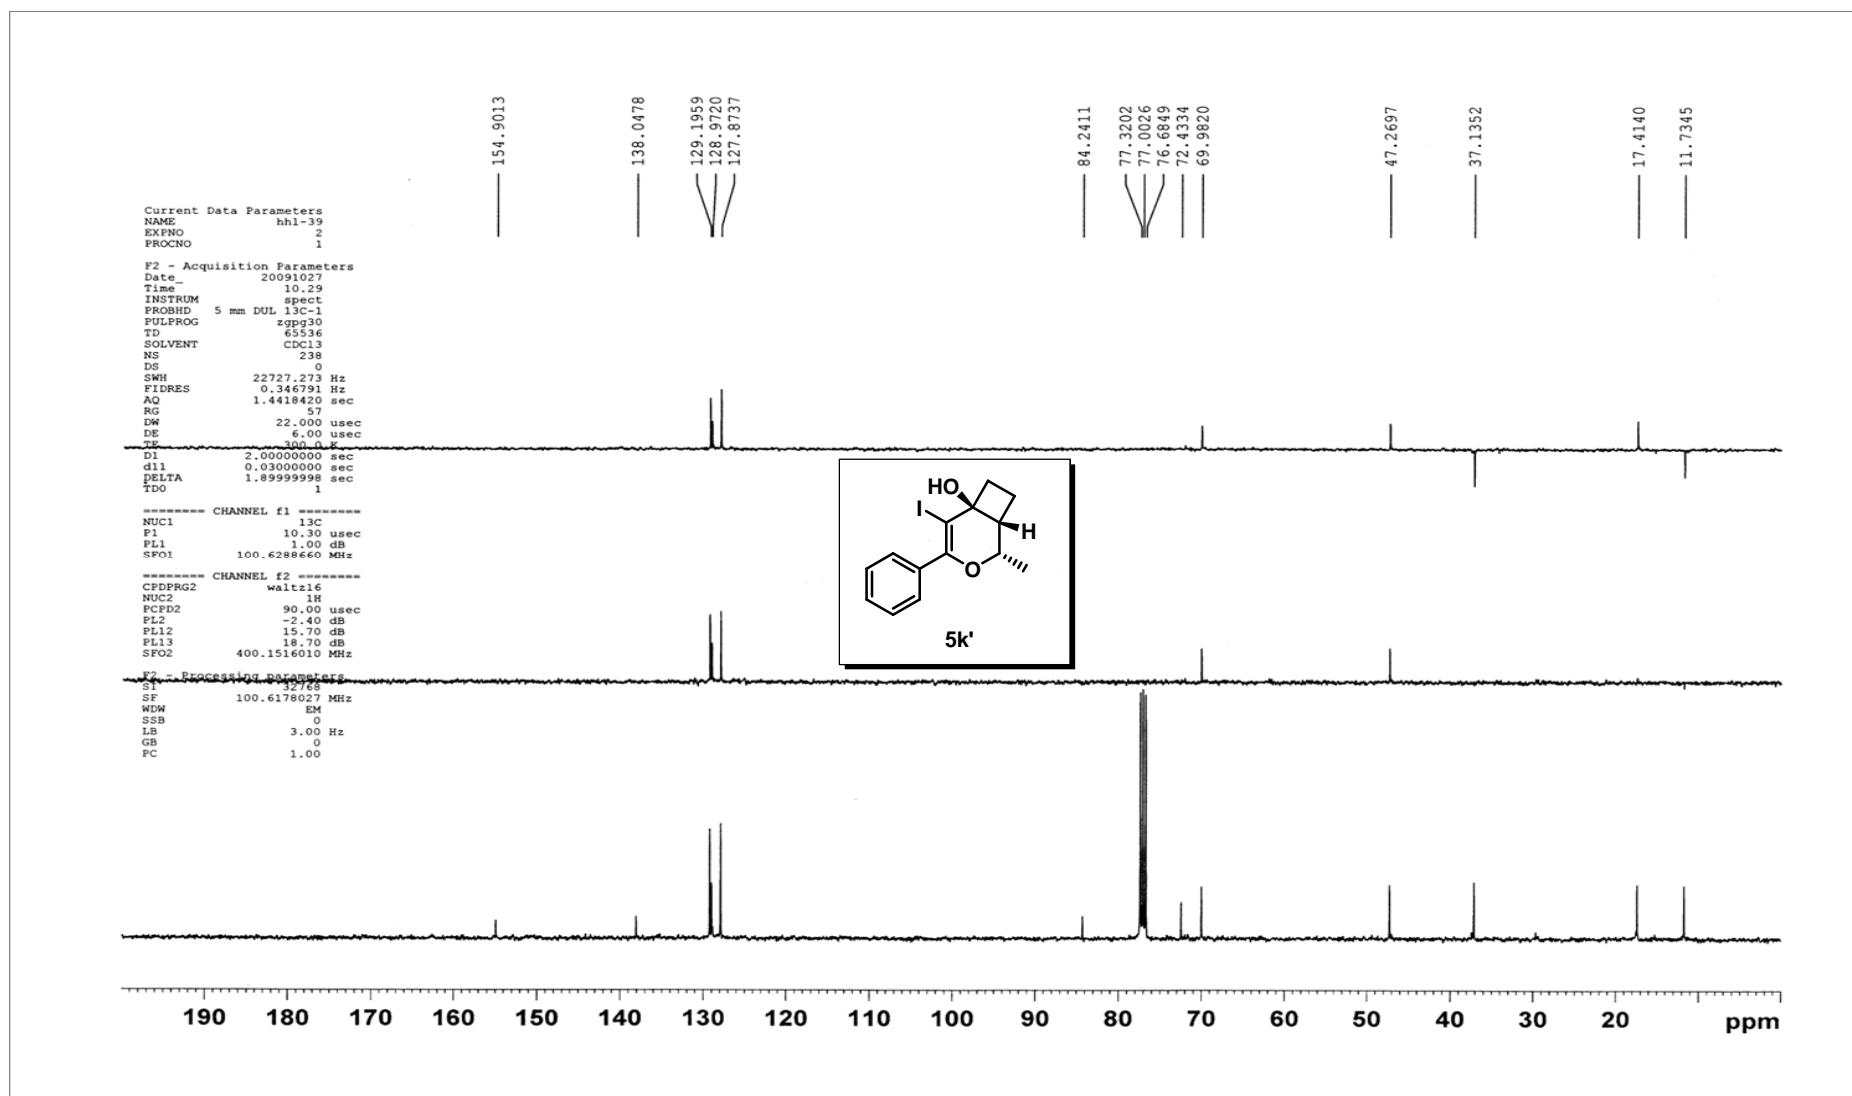

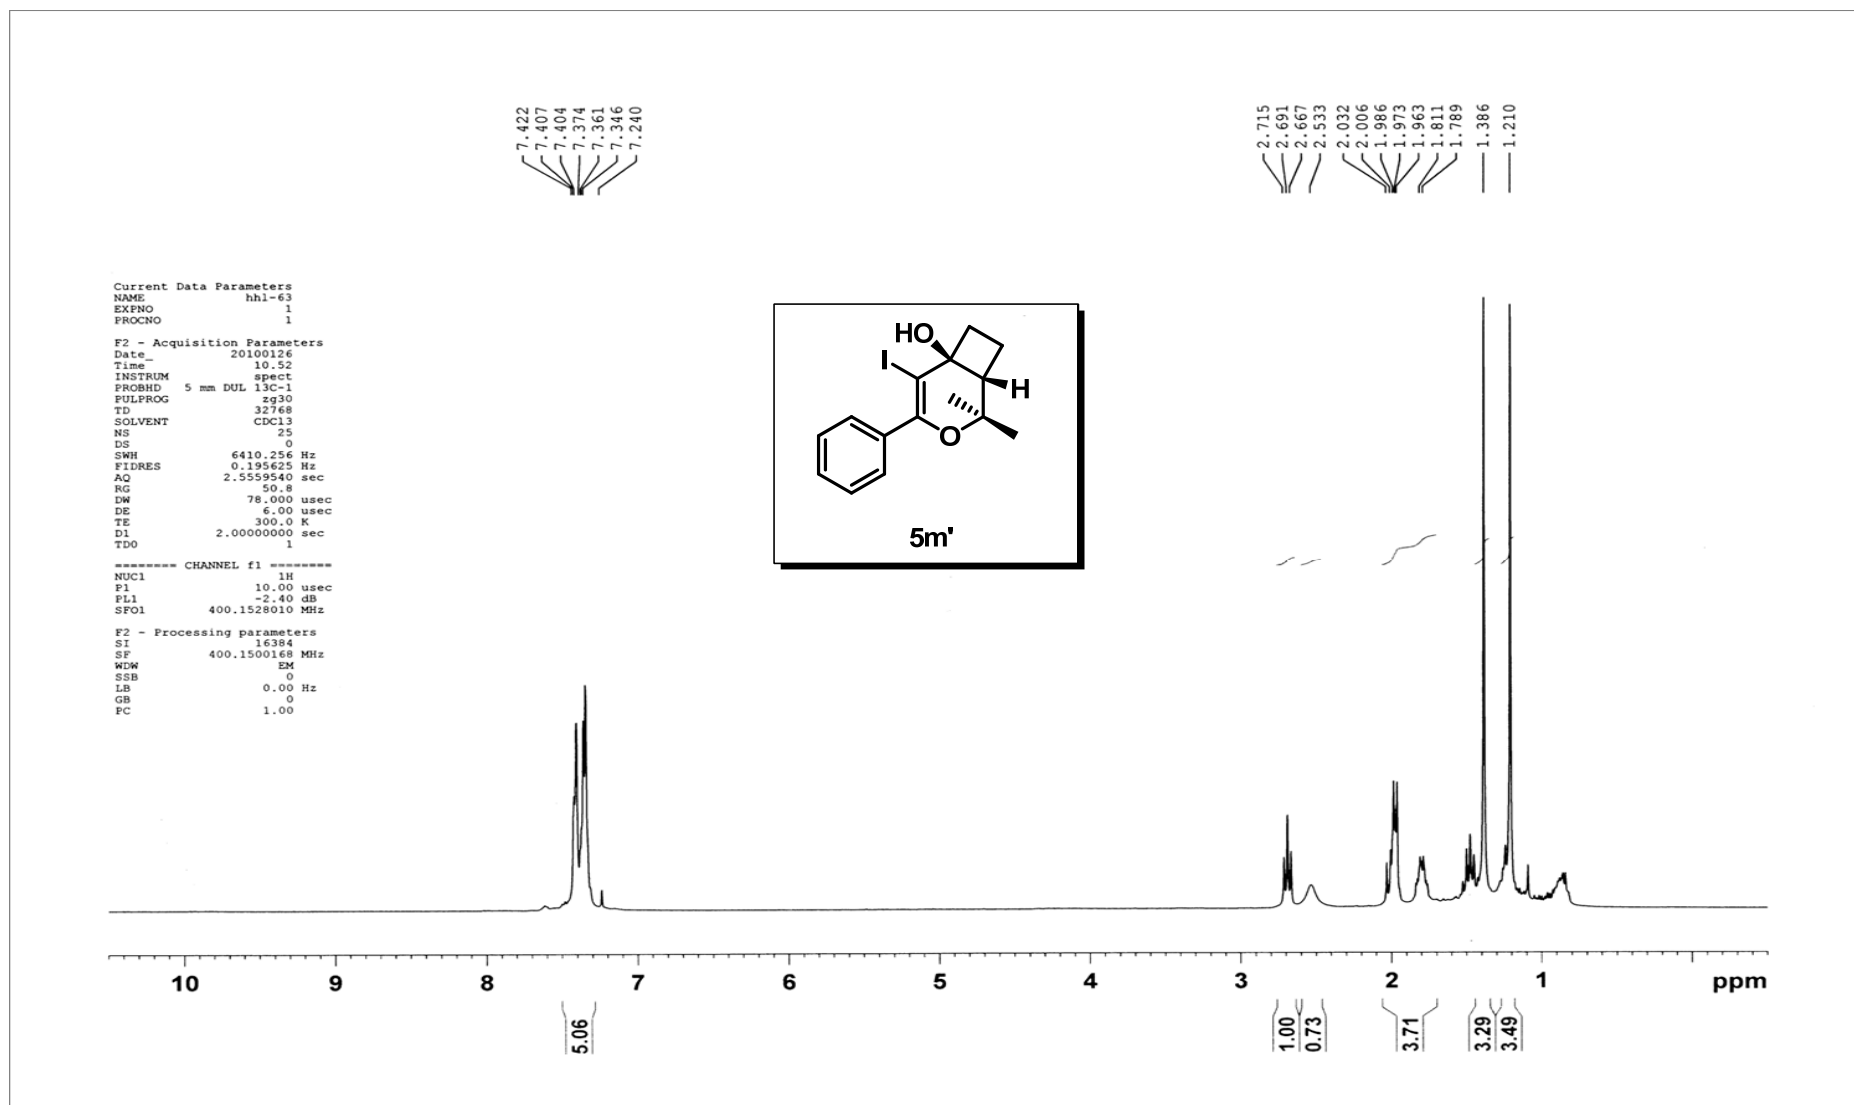



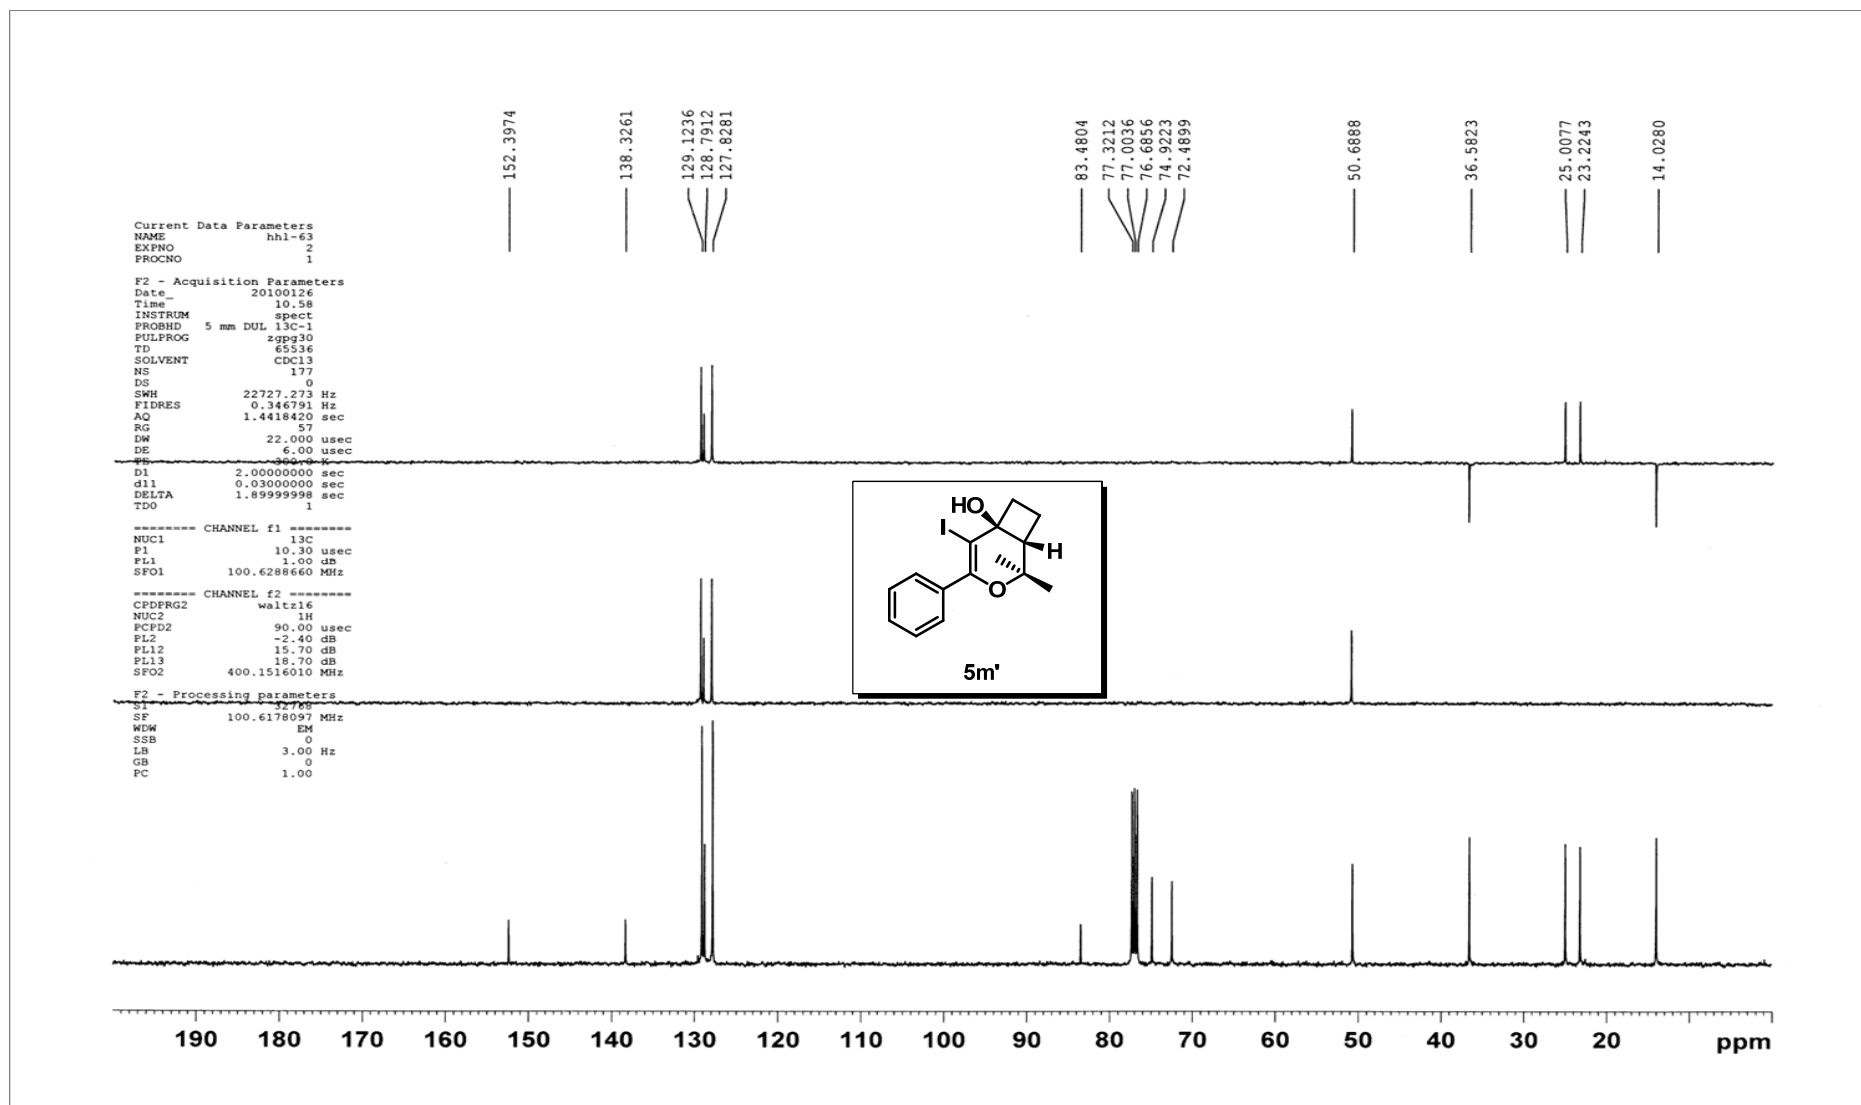

Supplement: spectra.pdf [file spectra.pdf]
